# Supplementary material
Source: PubMed Central journal article supplement (PMC4883595)
Supplement: NIHMS770340-supplement-1.pdf [file NIHMS770340-supplement-1.pdf]

---

***“Genome-wide association study identifies 74 loci  
associated with educational attainment”***

---

## **Table of contents**

|                                                                                                                           |     |
|---------------------------------------------------------------------------------------------------------------------------|-----|
| Supplementary Methods .....                                                                                               | 3   |
| 1 Methods GWA study.....                                                                                                  | 3   |
| 1.1 STUDY OVERVIEW .....                                                                                                  | 3   |
| 1.2 PHENOTYPE DEFINITION .....                                                                                            | 3   |
| 1.3 GENOTYPING AND IMPUTATION .....                                                                                       | 4   |
| 1.4 ASSOCIATION ANALYSES .....                                                                                            | 4   |
| 1.5 QUALITY CONTROL.....                                                                                                  | 6   |
| 1.6 META-ANALYSIS .....                                                                                                   | 12  |
| 1.7 WITHIN-SAMPLE REPLICATION.....                                                                                        | 13  |
| 1.8 OUT-OF-SAMPLE REPLICATION.....                                                                                        | 14  |
| 2 Testing for Population Stratification .....                                                                             | 19  |
| 2.1 BACKGROUND.....                                                                                                       | 19  |
| 2.2 WF-GWAS SIGN TEST .....                                                                                               | 20  |
| 2.3 LD SCORE INTERCEPT TEST .....                                                                                         | 22  |
| 2.4 DECOMPOSITION OF THE VARIANCE OF THE POLYGENIC SCORE—THEORY .....                                                     | 24  |
| 2.5 DECOMPOSITION OF THE VARIANCE OF THE POLYGENIC SCORE—RESULTS .....                                                    | 30  |
| 2.6 SIGNIFICANCE OF THE POLYGENIC SCORES IN A WF REGRESSION .....                                                         | 31  |
| 3 Genetic Overlap.....                                                                                                    | 34  |
| 3.1 INTRODUCTION .....                                                                                                    | 34  |
| 3.2 ESTIMATING GENETIC OVERLAP.....                                                                                       | 35  |
| 3.3 ENRICHMENT ANALYSIS AND LOOK-UP OF LEAD SNPs IN GWAS FOR OTHER PHENOTYPES.....                                        | 47  |
| 4 Biological Annotation .....                                                                                             | 60  |
| 4.1 LOOK-UP OF NONSYNONYMOUS STATUS, eQTL EFFECTS, ASSOCIATIONS WITH OTHER PHENOTYPES, AND PREDICTED GENE FUNCTIONS ..... | 63  |
| 4.2 ENRICHMENT ANALYSIS AND FINE-MAPPING OF GWAS SIGNALS WITH FGWAS .....                                                 | 69  |
| 4.3 FUNCTIONAL PARTITION OF HERITABILITY WITH GREML.....                                                                  | 75  |
| 4.4 FUNCTIONAL PARTITION OF HERITABILITY USING STRATIFIED LD SCORE REGRESSION .....                                       | 78  |
| 4.5 PRIORITIZATION OF GENES, PATHWAYS, AND TISSUES/CELL TYPES WITH DEPICT .....                                           | 83  |
| 4.6 ENRICHMENT OF LOCI BY GENES IMPLICATED IN SYNDROMIC DISORDERS .....                                                   | 98  |
| 4.7 TEMPORAL EXPRESSION PATTERN OF GENES PRIORITIZED BY DEPICT.....                                                       | 104 |
| 5 Polygenic Prediction .....                                                                                              | 107 |
| 5.1 METHODS .....                                                                                                         | 107 |
| 5.2 DISCUSSION .....                                                                                                      | 108 |

|     |                                            |     |
|-----|--------------------------------------------|-----|
| 6   | Mediation .....                            | 111 |
| 6.1 | THEORY AND METHODS .....                   | 111 |
| 6.2 | CAVEATS .....                              | 112 |
| 6.3 | STANDARD ERRORS FOR INDIRECT EFFECTS ..... | 112 |
| 6.4 | DATA .....                                 | 113 |
| 6.5 | RESULTS .....                              | 114 |
| 7   | Gene-environment Interactions .....        | 117 |
| 7.1 | INTRODUCTION .....                         | 117 |
| 7.2 | COHORT ANALYSIS .....                      | 117 |
| 7.3 | ASCERTAINMENT BIAS .....                   | 118 |
| 7.4 | DISCUSSION .....                           | 118 |
|     | Supplementary Notes .....                  | 123 |
| 8   | Author Contributions.....                  | 123 |
| 9   | Additional acknowledgments.....            | 134 |

# Supplementary Methods

---

## 1 Methods GWA study

### 1.1 Study Overview

We examined two phenotypes: a continuous variable measuring the number of years of schooling completed (*EduYears*,  $N = 293,723$ ) and an indicator variable for college completion (*College*,  $N = 280,007$ ). All analyses were performed at the cohort level according to a pre-specified and publicly archived analysis plan. Summary statistics provided by cohorts were uploaded to a central server and subsequently meta-analyzed. The lead PI of each cohort affirmed that the results contributed to the study were based on analyses approved by the local Research Ethics Committee and/or Institutional Review Board responsible for overseeing research. All participants provided written informed consent. Supplementary Table 1.1 provides basic information about the participating cohorts.

Our Analysis Plan was preregistered at <https://osf.io/paj9m/>. With one exception, the analyses reported here follow the original plan. The exception is that the original plan treated *EduYears* and *College* symmetrically whereas throughout the manuscript, we treat *EduYears* as the primary variable and de-emphasize *College*. After circulation of the Analysis Plan to our cohorts, a paper was posted on bioRxiv showing that the genetic correlation between the two measures is very high, with the point estimate suggesting a perfect genetic correlation<sup>1</sup>. Previously, we had considered as plausible the possibility that *College* would have better power for detecting associations at the upper end of the distribution of *EduYears*. However, since *College* is constructed by dichotomizing *EduYears*, the very high genetic correlation suggests that the *College* phenotype is for all intents and purposes merely a coarsening of the *EduYears* phenotype.

Hence, we reasoned in light of this new evidence that attempts to detect associations with *EduYears* are likely to be better powered, regardless of whether or not the effect is stronger at the upper end of the distribution of *EduYears*. To eliminate (or at least minimize) concerns about data mining, we made the decision to promote *EduYears* to the primary phenotype before quality-control work had begun in earnest. After the decision to make *EduYears* the primary phenotype was made, we performed the quality control sequentially. In the first stage, we completed the quality control of the *EduYears* variable, froze the meta-analysis, and announced to all analysts responsible for follow-up work that their work would be based on the pooled-sex *EduYears* results. We subsequently turned to the *College* quality control.

### 1.2 Phenotype Definition

Subjects in our cohorts are heterogeneous in terms of birth cohort and country of birth, and hence they were educated under a diverse set of educational systems. Moreover, the survey questions that were used to evaluate subjects' educational qualifications are not identical across cohorts. To maximize comparability across samples, we use as a standard the 1997 International Standard Classification of Education (ISCED) of the United Nations Educational, Scientific and Cultural Organization<sup>2</sup>. Specifically, we map each major educational qualification that it is possible to attain in a specific country into one of seven

harmonized ISCED categories. To construct our primary outcome variable, *EduYears*, we impute a years-of-education equivalent for each ISCED category using the mapping shown in Supplementary Table 1.2. Following Rietveld et al.<sup>3</sup>, we also analyzed the binary outcome, *College*, which takes the value 1 for subjects with an ISCED level equal to 5 or more (and 0 otherwise).

The study-specific phenotype measurements and distributions are summarized in Supplementary Table 1.3. With the exceptions of STR and HBCS, whose variables are derived from official register data on educational attainment, the studies relied on surveys to measure educational attainment.

### 1.3 Genotyping and Imputation

Genotyping was performed using a range of common, commercially available genotyping arrays. Study analysts were encouraged to impute markers from all 23 chromosomes using the 1000 Genomes project (1kGp) March 2012 version 3 release (hereafter, 1000G) as reference panel, the most recently released haplotype version available when the Analysis Plan was circulated. Given the well-known challenges in imputing markers on the X chromosome, cohorts who could only supply results for autosomal markers were also invited to participate. Supplementary Table 1.4 provides study-specific details on genotyping platform, pre-imputation quality-control filters applied to the genotype data, subject-level exclusion criteria, imputation software used, the reference sample used for imputation (haplotype release date and whether imputation was done using European-ancestry sample or the full 1000G-sample) and whether the cohort supplied us with results from the X chromosome. As the table shows, the overwhelming majority of cohorts followed the recommendation to impute their data against the March 2012 version 3 release of the 1000G panel. The exceptions are (i) SardiNIA, which used its own reference panel constructed from sequencing data available for about 2000 individuals in their sample<sup>4</sup>; (ii) Rush, whose imputation was based on the December 2010 haplotype release; and (iii) a handful of cohorts who began imputation relatively late and used more recent releases that were not available at the time that the Analysis Plan was written and circulated.

### 1.4 Association Analyses

#### 1.4.1 *EduYears* Analyses

Cohorts were asked to estimate this regression equation for each measured SNP (we drop the SNP subscript  $j$  here to avoid notational clutter):

$$(1) \quad \text{EduYears} = \beta_0 + \beta_1 \text{SNP} + \mathbf{PC} \boldsymbol{\gamma} + \mathbf{B} \boldsymbol{\alpha} + \mathbf{X} \boldsymbol{\theta} + \epsilon,$$

where *SNP* is the allele dose of the SNP; *PC* is a vector of the first ten principal components of the variance-covariance matrix of the genotypic data, estimated after the removal of genetic outliers; *B* is a vector of standardized controls, including a third-order polynomial in age, an indicator for being female, and their interactions; and *X* is a vector of study-specific controls. Specifically, in *X*, study analysts were encouraged to include dummy variables for major events such as wars or policy changes that may have affected access to education in their specific sample. Mixed-sex cohorts were additionally asked to upload separate regression results for men and women.

### 1.4.2 College Analyses

The *College* specification is analogous to the *EduYears* specification. Cohorts uploaded either coefficient estimates from a linear probability model or from a logistic regression model.

*Linear Regression.* The linear model can be written as

$$(2) \quad \text{College} = \beta_{0,\text{lin}} + \beta_{1,\text{lin}} \text{SNP} + \mathbf{PC} \boldsymbol{\gamma}_{\text{lin}} + \mathbf{B} \boldsymbol{\alpha}_{\text{lin}} + \mathbf{X} \boldsymbol{\theta}_{\text{lin}} + \epsilon_{\text{lin}},$$

where *College* is an indicator variable equal to one for individuals who completed college, the other variables are defined as above, and the subscript “lin” indicates that the variables correspond to the linear probability model. The parameter  $\beta_{1,\text{lin}}$  is the average change in the fraction of subjects whose value of *College* is equal to one associated with being endowed with one more copy of the reference allele, after linear adjustment for the covariates.

*Logistic Regression.* Most participating cohorts uploaded coefficient estimates from the logistic regression model,

$$(3) \quad P(\text{College} = 1 | \text{SNP}, \mathbf{PC}, \boldsymbol{\alpha}, \mathbf{X}) = \frac{1}{1 + e^{-(\beta_{0,\text{log}} + \beta_{1,\text{log}} \text{SNP} + \mathbf{PC} \boldsymbol{\gamma}_{\text{log}} + \mathbf{B} \boldsymbol{\alpha}_{\text{log}} + \mathbf{X} \boldsymbol{\theta}_{\text{log}})}},$$

where the subscript “log” is used to label coefficients from the logistic model. In this model, the parameter  $\beta_{1,\text{log}}$  can be interpreted as follows: controlling for the covariates, the odds of having completed college is increased by a factor of  $e^{\beta_{1,\text{log}}}$  for each increase of one copy of the reference allele.

### 1.4.3 Sample Selection Criteria

Only individuals satisfying the following criteria were eligible for inclusion in the estimation sample:

- a. Educational attainment was measured when the subject was 30 years of age or older.
- b. The subject passed the cohort’s standard quality controls, which typically include removal of subjects who are genetic outliers (to mitigate stratification concerns) and subjects with poor genotyping rates.
- c. The subject is of European ancestry, and the subject’s mother tongue is the same as the main language in the country of the cohort.
- d. All relevant covariates are available for the subject.

### 1.4.4 Study-Specific Details

Supplementary Table 1.5 provides study-specific details on the analysis. Column 2 shows the association software used by each study analyst. The *EduYears* analyses are based on summary statistics from all 64 samples listed in Supplementary Table 1.1. Of the 64 samples, whose combined sample size is  $N=293,723$ , 5 were from single-sex cohorts, and 59 contained pooled results from mixed-sex cohorts (who additionally uploaded separate results for men and women).

The *College* analyses were based on results from 52 of the 64 *EduYears* samples. The combined sample size of these 52 cohorts is  $N=280,007$ . One small cohort, LBC1921, is excluded because it did not upload *College* results. The cohort analyst determined that the low fraction of college-educated individuals (1-5%) and the small sample would not yield reliable estimates of the standard errors. Indeed, because analytical standard errors may not

be reliably estimated in small samples when the dependent variable is rare, we restrict our final analysis to cohorts with a combined sample size ( $N_{tot}$ ) of at least 500 and at least 100 cases ( $N_{cases}$ ). We also drop one family-based cohort (ERF) and one isolate (ORCADES) because the estimated standard errors of the logistic regression coefficients did not account for the sample relatedness (in both cases, the standard errors from their *EduYears* did account for relatedness). Column 3 of Supplementary Table 1.5 reports if a given sample was included in the College analyses and also explains why, in two samples, the *EduYears* sample size is not identical to the *College* sample size.

Column 4 reports whether the cohorts omitted any of the basic control variables recommended in the Analysis Plan in their specification. For example, some cohorts dropped higher-order polynomials in birth year because collinearity was causing problems in model estimation. Column 5 lists extra controls included by the cohorts in the vector  $\mathbf{X}$ , such as controls for cohort-specific events that may have impacted the education system in the cohort.

Several cohorts contain samples with related subjects. The Analysis Plan encouraged cohorts that include related subjects to estimate mixed linear models (MLMs)<sup>5,6</sup>. To facilitate their implementation, the Analysis Plan contained a supplement with sample code for MLM estimation written for the software GCTA<sup>7</sup>. Conceptually, the estimation of MLM models involves two steps: (i) the genome-wide data are used to estimate the degree of genetic similarity between each pair of individuals in the sample, and (ii) unlike in standard regression where the covariance of the error term (in an educational attainment regression) between any two individuals is assumed to be zero, the covariance is fitted as an increasing linear function of the individuals' genetic similarity. In other words, to the extent that two individuals are more recently descended from a common ancestor (as very accurately measured by overall genetic similarity)—and thus are more likely to be similar on unobserved environmental factors—these individuals are treated as correlated observations.

Many cohorts that include related subjects have developed strategies for ensuring that the standard errors correctly account for relatedness. Column 6 of Supplementary Table 1.5 reports whether the estimated standard errors were adjusted for family relatedness and provides information about the adjustment used. The details vary by software. For example, QIMR estimated a model implemented in the software Merlin Offline<sup>8</sup>, in which the variance-covariance matrix of the phenotypes of members of the same family is assumed to have a particular structure according to which resemblance between relatives is induced by the additive effects of their shared genes. Some cohorts made no adjustment for non-independence but instead sought to restrict the estimation samples to conventionally unrelated individuals. For example, 23andMe restrict their estimation sample to conventionally unrelated individuals by ensuring that no pair of participants in the final estimation sample share more than 700 centimorgans of their genome identical-by-descent<sup>9</sup>.

## 1.5 Quality Control

We closely followed the quality-control protocol used in the GIANT consortium's most recent study of height<sup>10</sup>. The protocol, implemented by the software *EasyQC*, is described in detail by Winkler et al.<sup>11</sup>. *EasyQC* calculates a range of test statistics that are valuable for identifying possible sources of error in uploaded summary statistics. It also outputs a harmonized set of graphs, described below, that can be visually inspected to identify problems with data or analysis. Below, we describe the quality-control filters that were applied to the uploaded files. We then describe a subset of several additional diagnostic tests that the files were required to pass before being included in the meta-analysis.

### 1.5.1 Quality Control Filters

Cohorts were asked to provide results according to a specific file format. For each genetic marker (which, in the uploaded results, included not just SNPs, but also indels and structural variants), cohorts were asked to supply the marker's chromosome and base-pair position, its rs number, its effect allele, its other allele, the effect allele frequency, the estimated regression coefficient (beta), the estimated standard error, and a  $P$ -value uncorrected for genomic control. For genotyped markers, the study analyst was asked to supply us with the Hardy-Weinberg  $P$ -value. For imputed markers, we requested information about the imputation quality provided by default by the software used. We also asked study analysts what imputation and association software was used.

From the uploaded files, we filtered out the following markers:

1. If the data were imputed against the September or December 2013 releases of the 1000 Genomes Phase 1 haplotypes provided by the software IMPUTE2, we drop the 730+199 SNPs whose strands were incorrectly aligned in these releases.<sup>a</sup>
2. We drop a marker if neither an effect allele nor other allele is supplied. We also drop a marker if any of the following variables are missing: effect allele frequency, beta, standard error,  $P$ -value, imputation accuracy (if the marker is imputed), or the imputed/genotyped indicator. For variables that can only take on some restricted range of values, we drop the marker if the value of the variable falls outside the permissible range. For example,  $P$ -values have to lie within the unit interval, and binary variables can only take on a value of 0 or 1.<sup>b</sup>
3. The analytical standard errors computed by genetic-association software packages are known to be unreliable in small samples, especially for low-frequency variants<sup>11</sup>. To guard against spurious associations with low-frequency markers in small samples, we dropped a marker from a cohort if its minor allele count (MAC) was below 25. We also drop markers that explain more than 5% of variance in *EduYears*, two order of magnitudes larger than the effects that should be considered plausible based on the findings in Rietveld et al.<sup>3</sup>.<sup>c,d</sup> For each SNP  $j$ , we approximate the variance explained by  $R_j^2 \approx \frac{2 \text{MAF}_j (1-\text{MAF}_j) \hat{\beta}_j^2}{\hat{\sigma}_y^2}$ .

<sup>a</sup> The announcement is available on [https://mathgen.stats.ox.ac.uk/impute/impute\\_v2.html#whats\\_new](https://mathgen.stats.ox.ac.uk/impute/impute_v2.html#whats_new)

<sup>b</sup> Four *College* cohorts reported  $P$ -values from likelihood-ratio (LR) tests in which the test-statistic is defined as  $\chi_{OBS}^2 = -2\ln\left(\frac{L_0}{L_1}\right)$ , where  $L_0$  is the log-likelihood of the full model and  $L_1$  is the log-likelihood of a restricted model in which the coefficient for SNP  $j$  restricted to equal 0. Under the null hypothesis that  $\beta_j = 0$ , the statistic is approximately distributed  $\chi^2(1)$ . Remaining cohorts conducted hypotheses-testing using conventional Wald tests in which the  $P$ -value is derived from the fact that the distribution of the test-statistic  $Z_{OBS} = \frac{\hat{\beta}}{\widehat{se}(\hat{\beta})}$  is approximately  $N(0,1)$ . The two tests are asymptotically equivalent, but may deliver different answers in finite samples. We err on the side of caution by dropping SNPs from the LR-test cohorts that fail to satisfy the inequality  $\left| \frac{\chi_{OBS}^2}{Z_{OBS}^2} - 1 \right| < 0.1$ .

<sup>c</sup> Standard practice is to drop SNPs with estimated betas whose absolute value exceeds some threshold considered to represent an implausibly large effect<sup>11</sup>. Rather than select a single  $\beta$  threshold, we decided to apply a more flexible filter that is not sensitive to the measurement scale of the dependent variable and allows the  $\beta$  threshold to vary by allele frequency. The latter is desirable because what constitutes a plausible effect size depends on the allele frequency. To illustrate using the example of height, an effect of 15 cm per allele need not indicate a quality-control problem for very low-frequency variants; in fact rare polymorphisms with effects of that magnitude have been identified<sup>27</sup>. However, for common variants, effects of that magnitude are impossible (the implied  $R^2$  would exceed 100% for any realistic value of the sample variance of height). To verify that the number of SNPs dropped due to the  $R^2$  filter is not alarmingly high, we reran the filtering of the cohort-level *EduYears* results files with the  $R^2$  filter applied last. We found that the  $R^2$  filter, after applying standard quality-control filters, does not remove *any* SNPs in any of the 44 largest cohorts (combined  $N = 278,528$ ). The filter removes a small number of SNPs in ten of the remaining 20 cohorts: LBC1936 (9 SNPs dropped), INGI-CARL (64), THISEAS (225),

4. We drop markers with low imputation-quality metrics. The exact definition of the quality metrics vary by software. In cohorts that supplied us with the Rsq variable generated by the imputation software MaCH<sup>12</sup>, we use a threshold of 0.6. In cohorts that supplied us with the INFO variable generated by the imputation software IMPUTE2<sup>13</sup>, we used a threshold of 0.7. These thresholds are stricter than those that have typically been used in previous studies predating the availability of the 1000G reference panel. We used the stricter thresholds because evaluations have shown that the conventional thresholds (in the range 0.3-0.4) do not filter out all badly imputed rare variants in 1000G data<sup>4</sup>. The MACH-Rsq and IMPUTE2-INFO thresholds we use were proposed by Pistis et al.<sup>4</sup> for variants with minor allele frequency below 1%. For transparency, and to err on the side of conservatism, we apply these thresholds to all markers. Finally, for cohorts that supplied us with PLINK's imputation-accuracy measure (info), we follow Winkler et al.'s<sup>11</sup> recommendation of using a threshold of 0.8.
5. We drop non-autosomal SNPs, indels, or structural variants. We drop the indels and structural variants because they are often poorly imputed and hence difficult to align, and we drop X-chromosome markers because they are analyzed separately.
6. If a cohort supplied us with an rs number, we use the reference file provided by EasyQC<sup>e</sup> to identify the marker's chromosome-position ID (ChrPosID). If a cohort only supplied information about the genetic position (chromosome and base pair) of the SNP, we generate a chromosome-position ID (ChrPosID) by horizontally concatenating the chromosome number and the base pair position. We subsequently drop duplicated markers based on ChrPosID, or markers whose ChrPosID's are unavailable in the 1000 Genomes phase 1 European panel (The 1000 Genomes Project Consortium 2012) that we use to identify potential strand problems. In this step, SNPs that cannot be successfully aligned due to allele mismatch with the reference panel are also removed.

Having applied filters 1-6 to cohort-level summary statistics, we examined how many SNPs were dropped in each filtering step. Whenever an unusual number of markers were being dropped, we flagged the cohort as potentially having an error in the uploaded results file. The issue was discussed with the cohort-level analyst and resolved through a new QC iteration.

### 1.5.2 EasyQC Diagnostics

We conducted several additional diagnostic checks after applying the filters described previously. Below, we describe the four most important of these. Winkler et al.<sup>11</sup> contains a comprehensive discussion of how these four diagnostic tests are useful for identifying a number of potential problems and their possible underlying causes.

---

H2000 Controls (16), Hypergenes (1), H2000 Cases (2), MoBa (566), OGP (2300), COPSAC2000 (8561). In a logistic regression model, the estimated proportion of variance explained by SNP  $j$  is defined as  $2 MAF_j (1 - MAF_j) \hat{\beta}_{j,\log}^2$ .

<sup>d</sup> For cohorts that report marginal effects from linear probability models, it is necessary to transform the estimated linear-probability coefficient  $\hat{\beta}_{j,\text{lin}}$  into a quantity that is comparable to  $\hat{\beta}_{j,\log}$  as estimated from a logistic model. We use the approximation  $\hat{\beta}_{j,\text{lin}} \approx \hat{f}(1 - \hat{f})\hat{\beta}_{j,\log}$ , where  $\hat{f}$  is the fraction of the sample with a college degree. The approximation is accurate for  $\hat{\beta}_{j,\text{lin}}$  small. Hence, we drop marker  $j$  if  $2 MAF_j (1 - MAF_j) \hat{\beta}_{j,\log}^2 > 0.05$  (logistic model) or  $2 MAF_j (1 - MAF_j) \left(\frac{\hat{\beta}_{j,\text{lin}}}{\hat{f}(1-\hat{f})}\right)^2 > 0.05$  (linear probability model).

<sup>e</sup> [http://homepages.uni-regensburg.de/~wit59712/easyqc/1000g/rsmid\\_map.1000G\\_ALL\\_p1v3.merged\\_mach\\_impute.v1.txt.gz](http://homepages.uni-regensburg.de/~wit59712/easyqc/1000g/rsmid_map.1000G_ALL_p1v3.merged_mach_impute.v1.txt.gz), accessed on 22 June 2015.



#### *Diagnostic Test #1. Allele Frequency Plots (AF Plots)*

We looked for errors in allele frequencies and strand orientations by visually inspecting a plot of the sample allele frequency of filtered SNPs against the frequency in the 1000 Genomes phase 1 version 3 European panel<sup>14</sup>.

#### *Diagnostic Test #2. P-value vs Z-score Plots (PZ Plots)*

We verified that the reported *P*-values are consistent with the *P*-values implied by the coefficient estimates and standard errors in the results file.

#### *Diagnostic Test #3. Quantile-Quantile Plots (QQ Plots)*

We visually inspected the cohort-level QQ plots to look for evidence of unaccounted-for stratification.

#### *Diagnostic Test #4. Predicted vs Reported Standard Error Plots (PRS Plots)*

We investigated if the standard errors reported in the *EduYears* files are roughly consistent with the reported sample size, allele frequency, and phenotype distribution. Winkler et al.<sup>11</sup> propose a similar diagnostic (the *SE-N Plots*), which is based on following approximation to the standard error of a coefficient estimated by OLS

$$(4) \quad (s.e.)_j \approx \frac{\hat{\sigma}_Y}{\sqrt{N}} \cdot \frac{1}{\sqrt{2 MAF_j (1 - MAF_j)}}$$

where  $\hat{\sigma}_Y$  is the standard deviation of the dependent variable,  $MAF_j$  is the minor allele frequency of SNP  $j$ , and  $N$  is the sample size. We used Equation (4) to generate a predicted standard error for 50,000 randomly sampled SNPs. We then plotted these predicted standard errors against the reported standard errors. Since the assumptions underlying Equation (4)—independent observations, no other controls are included in the regression, and no estimation error that is due to imputation uncertainty—do not hold exactly, the main purpose of the plot is detect substantial discrepancies between the reported and actual size of the estimation sample or errors in phenotype transformation. Specifically, we visually inspected the plot to ensure that the standard errors were of approximately the predicted magnitude and that there were no major outliers.

When examining the standard errors in the *College* files, we proceeded similarly, albeit using an analytical approximation for the standard error of the coefficient from a logistic regression when appropriate. The approximation is

$$(5) \quad (s.e.)_j \approx \frac{1}{\sqrt{N}} \cdot \frac{1}{\sqrt{2 \hat{f}(1 - \hat{f}) MAF_j (1 - MAF_j)}}$$

where  $\hat{f}$  denotes the fraction of college graduates in the sample.

### **1.5.3 SNP Exclusions**

Our meta-analyses are based on files that have been filtered according to the six QC-filter steps described above and that have passed the four diagnostic tests. Supplementary Table 1.6 shows, for each of the cohorts contributing to our pooled *EduYears* analysis, the number of SNPs in the originally uploaded results files, the number of SNP exclusions in each of the six steps, and the number of SNPs remaining after the full set of QC steps were applied.

Supplementary Table 1.7 shows the analogous numbers for *College*. All subsequent analyses are based on the set of SNPs remaining after these exclusions.

#### 1.5.4 Genomic Control Factors

The last column of Supplementary Tables 1.6 and 1.7 shows the genomic control factor,  $\lambda_{GC}^{15}$ , from each sample. With the exception of deCODE, whose standard protocol is to apply genomic control to the standard errors before uploading results, the reported genomic control factors are all computed using untransformed standard errors. For *EduYears*, the unweighted average  $\lambda_{GC}$  is 1.02, with a range from 0.95-1.15 and a median of 1.01. For *College*, the corresponding numbers are 1.01, 0.93-1.13, and 1.01. Supplementary Tables 1.6 and 1.7 also report the inflation factor used by deCODE to inflate their standard errors prior to uploading the results.

#### 1.5.5 Additional Diagnostics

Here, we summarize the results from three additional diagnostic tests of the cleaned results files.

##### 1.5.5.1 Cohort-Level $F_{st}$ Statistics

$F_{st}$  is a frequently used measure of between-population genetic differentiation. We estimated  $F_{st}$  using summary data on cohort-level allele frequencies using an approach described by Weir<sup>16</sup>. For each cohort, we calculated the  $F_{st}$  relative to the European-ancestry individuals in the 1000G sample<sup>14</sup>. We sampled 30,000 quasi-independent markers with minor allele frequencies greater than 0.05 in the European-ancestry subjects. We computed the  $F_{st}$  of each SNP and averaged over the 30,000 markers to get an overall measure of  $F_{st}$  in the cohort. Because our reference sample is European, an unusually high level of  $F_{st}$  may be an indication that a cohort inadvertently failed to remove genetic outliers or a sign of genotyping or imputation problems.

In Weir<sup>16</sup>, the equation for estimating  $F_{st}$  is

$$(6) \quad F_{st} = \frac{\frac{r}{(r-1) \sum_{i=1}^r n_i} [\sum_{i=1}^r n_i (p_i - \bar{p})^2]}{\bar{p}(1 - \bar{p})}$$

where  $r$  is the number of populations in the sample,  $n_i$  is the number of individuals in the sample from population  $i$ ,  $p_i$  is the sample minor allele frequency of the SNP in the sample in population  $i$ , and  $\bar{p}$  is the weighted average frequency across populations in the sample. Since in our case  $r = 2$ , Equation (6) specializes to

$$(7) \quad F_{st} = \frac{\frac{2}{N} [n_1(p_1 - \bar{p})^2 + n_2(p_2 - \bar{p})^2]}{\bar{p}(1 - \bar{p})}$$

where  $N = n_1 + n_2$ , and  $\bar{p} = \frac{n_1}{N} p_1 + \frac{n_2}{N} p_2$  is the mean allele frequency. For most EA cohorts, the average  $F_{st}$  value was below 0.004, which agrees well with previous reports that  $F_{st}$  is around 0.004 between European nations<sup>17</sup>. The largest  $F_{st}$ , a value of 0.02, was observed for the cohort OGP-Talana. It is known that the central-eastern Sardinia region, Ogliastra, has been secluded from the surrounding regions for most of its history. Such isolation is expected to generate an unusually high  $F_{st}$ .<sup>18</sup> Although the possibility of technical

problems for genotype calling or imputation cannot be ruled out, the observed  $F_{st}$  values indicate that the quality of the reported genotype data is consistent with observed differences in sample allele frequencies between populations, and there is no evidence that cohorts are derived from non-European ancestry. Supplementary Table 1.8 summarizes the  $F_{st}$  results from our 64 samples.

#### 1.5.5.2 $\lambda_{meta}$ Test for Genetic Effects for Each Pair of Cohorts

We computed a second diagnostic summary statistic,  $\lambda_{meta}$ , which can help identify a number of problems, including unknown sample overlap between cohorts (which would violate the assumption of independence underlying the meta-analysis). Given a pair of cohorts and a locus,  $\lambda_{meta}$  is defined as

$$(8) \quad \lambda_{meta} \equiv \frac{(b_1 - b_2)^2}{\sigma_{b_1}^2 + \sigma_{b_2}^2}.$$

where  $b_i$  and  $\sigma_{b_i}^2$  are the reported allelic effect and sampling variance of the number of minor alleles in cohort  $i \in \{1, 2\}$ . If the two cohorts are independent and if the genetic correlation of the phenotype across the two cohorts is 1, then the expected value of  $\lambda_{meta}$  across loci is 1. If the cohorts overlap substantially, then the reported effect sizes are too similar, and therefore the numerator is smaller than the denominator, leading to  $\lambda_{meta} < 1$ . Conversely, if there is too much heterogeneity in the estimated effect sizes for a pair of cohorts, either because the phenotypes are not the same or because results are not reported for the same allele, then  $\lambda_{meta} > 1$ . Hence this statistic is a useful QC metric to detect deviations in the reported summary statistics for a pair of cohorts from the assumed null hypothesis of independence and homogeneity. In our data, the average value of  $\lambda_{meta}$  is only slightly greater than 1 (see Supplementary Table 1.8), suggesting no overall deviation from expectation.

#### 1.5.5.3 Tests of Allele Misalignment

We supplemented our visual inspection of the allele frequency plots with two additional tests of allele misalignment. First, we generated a pruned set of SNPs from the deCODE summary statistics whose  $P$ -value for the test of association with *EduYears* was smaller than 0.01. For each of our other samples, we calculated the frequency with which the estimated effects had the same sign as in the deCODE results. In all but one of the cohorts with a sample size above 5,000, the fraction of coefficient signs that aligned with deCODE exceeded 50% (see Supplementary Table 1.9).

Second, we used LD Score regression<sup>19</sup> to estimate the genetic correlation between *EduYears* in each of our samples and *EduYears* in deCODE. The estimator often failed to converge, especially for smaller cohorts, but of the 21 estimates obtained, all but one are in the predicted (positive) direction. The negative estimated genetic correlation is for the cohort Rush-MAP: it is -0.29 but has a large standard error (s.e. = 0.70). Given that Rush-MAP passes all other diagnostics, it is likely that the negative estimate is a chance outcome due to sampling variability. The estimated genetic correlations are shown in Supplementary Table 1.10.

## 1.6 Meta-Analysis

We used the software program METAL<sup>20</sup> to conduct sample-size-weighted meta-analysis of all SNPs that passed the quality-control thresholds. Prior to running the meta-analyses, we applied a single correction for genomic control to the cohort-level summary statistics. A total of 9,256,490 autosomal SNPs were meta-analyzed using data in the 64 filtered *EduYears* files, and 9,280,749 autosomal SNPs were meta-analyzed using data in the 52 filtered *College* files.<sup>f</sup>

### 1.6.1 *EduYears* ( $N = 293,723$ )

We used sample-size-weighted meta-analysis in our primary analyses because the method is more robust to errors in variable scaling at the cohort level. As a robustness check, we also conducted a secondary meta-analysis of *EduYears* with inverse-variance weighting. Consistent with the results from our many diagnostic tests, the results were highly similar, suggesting that the scale of measurement was successfully harmonized across cohorts. The correlation between the two sets of  $P$ -values obtained using the two methods was 0.91. We conducted sample-size-weighted sex-stratified meta-analyses of *EduYears* as another robustness check to see whether the results differ for men and women.

Extended Data Fig. 1 shows the quantile-quantile plot of the  $P$ -value distributions for the pooled-sex meta-analysis. As is expected under polygenicity, the plots show strong evidence of  $P$ -value inflation ( $\lambda_{GC} = 1.28$ ). In Supplementary Information section 3, we use a variety of tools, including LD Score regression<sup>19</sup> and various tests of within-family association, to quantify how much of this inflation can plausibly be attributed to unaccounted-for stratification biases. The results from these analyses consistently suggest that unaccounted-for stratification biases are unlikely to account for more than a modest share of the observed inflation in the  $\lambda_{GC}$  in the pooled *EduYears* analysis. Forest plots of the *EduYears*-associated SNPs (not shown) provide little evidence that the estimated effects are driven by a small number of outlier cohorts, cohorts from a given region, or by one of the sexes (see Supplementary Table 1.11 for the heterogeneity  $I^2$  statistics and  $P$ -values for the lead SNPs).

To select independent genome-wide significant SNPs from our primary *EduYears* results, we first grouped the GWAS results into “clumps” as follows. The SNP with the smallest  $P$ -value was chosen as the lead SNP in its clump. All SNPs less than 500 kb away from this lead SNP, in LD with it to the extent  $r^2 > 0.1$ , and with an association  $P$ -value smaller than  $10^{-6}$  were assigned to this clump. The next clump was greedily formed around the SNP with the next smallest  $P$ -value not already assigned to the first clump. This process was iterated until no SNPs remained with  $P$ -value  $< 5 \times 10^{-8}$ . The end result was 77 approximately independent clumps, each centered around, and represented by, a genome-wide significant SNP.

Next, we checked the long-range LD between these 77 approximately independent SNPs without imposing any restriction on distance (except for residing on the same chromosome). If the  $r^2$  between two SNPs is greater than 0.5, we merged the corresponding clumps and assigned the SNP with smaller  $P$ -value to represent that locus. This step resulted in 74 approximately independent loci, each represented by a genome-wide significant SNP. The PLINK tool version 1.9<sup>21</sup> and 1000 Genomes Project phase 1 genotyping data<sup>22</sup> (from 268 individuals with European ancestry) was used to perform clumping and calculating  $r^2$  between a pair of SNPs. Supplementary Table 1.11 shows the *EduYears* pooled-sex and sex-stratified association results for these 74 approximately-independent genome-wide significant SNPs.

---

<sup>f</sup> SNPs with a sample size less than 100,000 (3,074,494 SNPs in *EduYears*, and 3,161,722 SNPs in *College*) were excluded from the meta-analyses.

To help gauge the magnitude of the estimated effects, we used a well-known approximation to compute unstandardized regression coefficients from the METAL output obtained from the sample-size-weighted meta-analysis:

$$(9) \quad \hat{\beta}_j \approx z_j \frac{\hat{\sigma}_Y}{\sqrt{2N_j MAF_j (1 - MAF_j)}}$$

for SNP  $j$  with minor allele frequency  $MAF_j$ , sample size  $N_j$ , METAL  $z$ -statistic  $z_j$ , and standard deviation of the phenotype  $\hat{\sigma}_Y$ . For a derivation, see the SOM in Rietveld et al.<sup>3</sup>. Extended Data Fig. 2a shows effects in standard-deviation units of the SNP with lowest  $P$ -value in each of the 74 loci, ordered from largest to smallest. Consistent with the findings in Rietveld et al.<sup>3</sup>, the estimated effects of most common variants are in the range 0.02-0.04  $SD$ , implying that an additional allele of the education-increasing allele is associated with approximately 0.5 to 1.5 months of additional schooling. The minor allele frequency of the SNP with the largest effect size in  $SD$ -units is 0.04.

### 1.6.2 College ( $N = 280,007$ )

Overall, the results are similar to those from the *EduYears* analyses, but with higher  $P$ -values (consistent with the hypothesis that the *College* variable is a noisier measure of educational attainment than the *EduYears* variable). If we apply the procedure described previously to determine the number of approximately independent SNPs reaching genome-wide significance, we find 34 such SNPs (compared to 74 in the *EduYears* meta-analysis). Of these, 24 reach genome-wide significance in the *EduYears* analyses, and 27 are within 500kb distance and in LD with an *EduYears* lead SNP to the extent  $r^2 > 0.1$ . Supplementary Table 1.12 shows the association results for these 34 approximately independent genome-wide significant SNPs from the *College* meta-analysis and the *EduYears* lead SNPs in the same locus, if any.

## 1.7 Within-Sample Replication

Following the suggestion of a referee, we attempted to replicate the genome-wide associations reported in our previous GWAS of EA<sup>3</sup> in the new cohorts that were added to this study. Conversely, we also examined if the SNPs that reach genome-wide significance in a meta-analysis of the new cohorts replicate in the Rietveld et al. cohorts.

### 1.7.1 Cohort Overlap with Rietveld et al. (2013)

The analyses of *EduYears* in Rietveld et al.<sup>3</sup> were based on a discovery sample of 101,069 individuals and a combined sample (discovery + replication) of 126,559 individuals. Some of the cohorts that contributed to the Rietveld et al. study did *not* participate in the present study ( $N = 13,981$ ). Overall, the combined sample size of the Rietveld et al. cohorts that contributed to our study is  $N = 126,413$  individuals. This number exceeds the difference between 126,559 and 13,981 because some of the original Rietveld et al. cohorts completed additional genotyping since 2013, and were hence able to contribute larger samples to the current study.

### 1.7.2 Methods in Within-Sample Replication Analyses

Rietveld et al. reported three genome-wide significant SNPs in their discovery sample, all of which replicated in their replication sample. These three SNPs also yielded lower  $P$ -values in the “combined” (discovery + replication) sample. In a meta-analysis of the combined sample, four additional SNPs reached genome-wide significance. Of these, five were genome-wide significant in the *EduYears* analyses. The remaining two only reached genome-wide significance in the analyses of *College*, but both had  $P$ -values just shy of genome-wide

significance in the combined-sample *EduYears* analysis. Given our decision to make *EduYears* the primary phenotype, and to facilitate comparisons of effect sizes, we attempt to replicate all of the seven original associations in our meta-analyses of the *EduYears* variable. To examine if the seven associations replicate in our new cohorts, we split our overall sample into two subsamples comprising: (1) cohorts that participated in Rietveld et al.<sup>3</sup> and (2) all new cohorts that were added to the current study. In what follows we refer to the former as the “Rietveld Cohorts” and the latter as the “New Cohorts.” We refer to the combined-sample meta-analysis results reported by Rietveld et al.<sup>3</sup> as the “Rietveld et al. (2013) Cohorts.”

### **1.7.3 Within-Sample Replication Results**

Supplementary Table 1.13 reports the results of the replication analysis. In the upper panel, we report for the seven SNPs, their standardized effect sizes, standard errors, and *P*-values. We report these statistics from three separate meta-analyses of *EduYears* conducted in: (i) the Rietveld et al. (2013) Cohorts (ii) the Rietveld Cohorts, and (iii) the New Cohorts. The reference allele is chosen to be the allele associated with higher values of *EduYears* in Rietveld et al.’s analysis (2013).

Given the high degree of overlap between cohorts in the previous EA meta-analysis<sup>3</sup> and the Rietveld Cohorts, the similarity of the effect-size estimates is unsurprising. Reassuringly, the sign of the estimated coefficient in the New Cohorts is always in the predicted direction, and for all but one of the seven SNPs we can reject the null hypothesis of no effect at the 5% significance level (two SNPs, rs4851266 and rs9320913, reach genome-wide significance also in the replication sample). For six of the seven SNPs, the 95% confidence intervals for the estimated effect sizes overlap across the Rietveld Cohorts and the New Cohorts.

To further examine replicability, we examined if SNPs that reach genome-wide significance in a meta-analysis of the New Cohorts replicate in the Rietveld Cohorts. Applying the pruning algorithm described in Supplementary Information section 1.6.1 to meta-analysis results for the New Cohorts resulted in 14 approximately independent SNPs. The results from this replication analyses are reported in Panel B of Supplementary Table 1.13. The results are similar to those of the replication of the associations from the Rietveld Cohorts in the New Cohorts: the signs align for all 14 SNPs, and 12 SNP replicate at *P*-value < 0.05 in the Rietveld Cohorts (none of them at genome-wide significance, but 5 at *P*-value < 10<sup>-5</sup>).

In the two replication analyses, the average effects in the replication samples are about 35% smaller than the estimated effect of the genome-wide significant association, roughly consistent with the degree of inflation one would expect from a Winner’s Curse correction of the sort described and performed in the next subsection.

## **1.8 Out-of-Sample Replication**

Between the time when we submitted our manuscript for publication and when we received the referee reports, we gained access to the first wave of UK Biobank (UKB) data.<sup>23,24</sup> Here, we report the results from a replication analysis of the 74 lead SNPs that emerged from our GWAS meta-analysis of *EduYears*.

### **1.8.1 Methods in Out-of-Sample Replication Analyses**

Our out-of-sample replication analyses uses data from the interim release of the UKB data and closely follows the methodological best practices recommended in the documentation that has been made publicly available through the UKB website<sup>23</sup>. Following the “exemplary GWAS” described in the documentation, we restrict the analysis to the subsample of *N* = 112,338 conventionally unrelated individuals with “White British” ancestry. Dropping a

small number of observations with missing phenotypic data leaves us with our final estimation ( $N = 111,349$ ). Details on genotyping, pre-imputation quality control, and imputation of the interim release data have been documented extensively elsewhere<sup>25</sup>.

Supplementary Table 1.14 provides additional details on the UKB analysis, including information about phenotype construction, sample demographics, association software, and the regression specification we estimate. As recommended by the UKB, we control for genotyping array in all analyses and use the software SNPTEST with the “–method expected” option specified. We applied exactly the same quality-control filters as in our main analyses to the UKB results file.

Because two of the 74 lead SNPs are missing from the quality-controlled UKB results file, we replaced them with nearby proxies. Specifically, we replaced lead SNP rs8005528 with rs8008779 ( $r^2 = 0.69$ ) and lead SNP rs192818565 with rs55943044 ( $r^2 = 0.93$ ). In both cases, the proxy was selected by choosing from the pooled discovery sample the lowest  $p$ -value SNP within 500 kb of the original lead SNP, restricting the search to SNPs available in the UKB data.

### **1.8.2 UKB Replication Results**

Supplementary Table 1.15 and Extended Data Fig. 4 report the results. Of the 74 lead SNPs, 72 have the anticipated sign in the replication sample, and 52 replicate at the 5% level (always with an effect size in the anticipated direction). Of the 52 SNPs, 7 reach genome-wide significance in the replication sample.

Under the null model that each of the lead SNPs are null in both the discovery and replication data, we would expect 50% of the SNPs (37 SNPs) to have a concordant sign in the discovery and replication samples, we would expect 5% (3.7 SNPs) to be significant at the 5% level, and we would expect 0.000005% ( $3.7 \times 10^{-6}$  SNPs) to be genome-wide significant.

We can construct  $P$ -values associated with these results, noting that the number of SNPs that have a concordant sign or that are above a certain significance level is distributed as a Binomial(74,  $\pi$ ) where  $\pi$  is the expected fraction of concordant or significant SNPs reported in the previous paragraph. Given that we are specifically interested in an increase in concordance or significance, we use a one-sided test. The  $P$ -value associated with the sign concordance is then  $1.47 \times 10^{-19}$ , the  $P$ -value associated with the number of SNPs significant at the 5% level is  $2.68 \times 10^{-50}$ , and the  $P$ -value associated with the number of genome-wide significant SNPs is  $1.41 \times 10^{-42}$ .

We can additionally measure the replicability of the GWAS estimates generally by assessing the genetic correlation between the discovery and replication samples. We estimate this using bivariate LD Score regression. (Details of estimating genetic correlation using LD Score regression, including the reference panel used to produce LD Scores, are in Supplementary Information section 3.2.2.) We estimate a genetic correlation of 0.946 ( $SE = 0.021$ ). These results, along with the  $P$ -values reported above, suggest that the GWAS coefficients estimated in this paper in general, and the estimates of the 74 lead SNPs in particular, are highly replicable.

### **1.8.3 Expected Replication Record**

To benchmark this replication record under a natural alternative hypothesis (as opposed to the expected replication under the null hypothesis calculated above), we calculated the expected degree of replication given the meta-analysis results, the sample size in the meta-analysis, and the sample size of the replication sample. To do this, we conducted a Bayesian Winner’s Curse correction described in a previous study of cognitive performance (Rietveld et al.,

2014<sup>26</sup>, SI pp. 7-13). We assume a diffuse prior (in the notation of the original paper,  $\tau^2 \rightarrow \infty$ ), and we treat the winners'-curse-adjusted estimates as the vector of true underlying parameters,  $\boldsymbol{\beta}$ . Below, we denote the vector of standard errors from our meta-analysis and the UKB replication by  $\sigma_{\text{GWAS}}$  and  $\sigma_{\text{UKB}}$ , respectively. The probability that SNP  $i$  has a matching sign across the two analyses is

$$P(\text{match}_i) = \Phi\left(-\frac{|\beta_i|}{\sigma_{\text{GWAS},i}}\right)\Phi\left(-\frac{|\beta_i|}{\sigma_{\text{UKB},i}}\right) + \left[1 - \Phi\left(-\frac{|\beta_i|}{\sigma_{\text{GWAS},i}}\right)\right]\left[1 - \Phi\left(-\frac{|\beta_i|}{\sigma_{\text{UKB},i}}\right)\right],$$

where  $\Phi(\cdot)$  is the standard normal cumulative distribution function. Similarly, the probability that the UKB estimate for SNP  $i$  is significant at the  $\alpha$ -level is

$$P(\text{sig}_i) = \Phi\left(-\frac{|\beta_i|}{\sigma_{\text{GWAS},i}} + \Phi^{-1}\left(\frac{\alpha}{2}\right)\right) + \left[1 - \Phi\left(-\frac{|\beta_i|}{\sigma_{\text{GWAS},i}} - \Phi^{-1}\left(\frac{\alpha}{2}\right)\right)\right].$$

Since the lead SNPs are (approximately) independent, the expected number of SNPs with matching signs in the discovery and replication analyses is simply

$$\sum_i P(\text{match}_i).$$

And the expected number of SNPs meeting the threshold  $\alpha$  is

$$\sum_i P(\text{sig}_i).$$

Applying the above methodology, we find that 71.4 of the 74 SNPs are expected to have matching signs, 40.3 SNPs are expected to be significant at the 5% level, and 0.6 SNPs are expected to be genome-wide significant. The observed numbers are, respectively, 72, 51 and 7. The replication record of the lead SNPs in the UKB is hence somewhat stronger than predicted by the power calculations.

## References

1. Bulik-Sullivan, B. *et al.* An atlas of genetic correlations across human diseases and traits. *Nat. Genet.* **47**, 1236–1241 (2015).
2. UNESCO. *International Standard Classification of Education ISCED 1997*. (2006). at <[http://www.unesco.org/education/information/nfsunesco/doc/isced\\_1997.htm](http://www.unesco.org/education/information/nfsunesco/doc/isced_1997.htm)>
3. Rietveld, C. A. *et al.* GWAS of 126,559 individuals identifies genetic variants associated with educational attainment. *Science* **340**, 1467–71 (2013).
4. Pistis, G. *et al.* Rare variant genotype imputation with thousands of study-specific whole-genome sequences: implications for cost-effective study designs. *Eur. J. Hum. Genet.* **23**, 975–983 (2015).



5. Kang, H. M. *et al.* Variance component model to account for sample structure in genome-wide association studies. *Nat. Genet.* **42**, 348–54 (2010).
6. Yang, J., Zaitlen, N. a, Goddard, M. E., Visscher, P. M. & Price, A. L. Advantages and pitfalls in the application of mixed-model association methods. *Nat. Genet.* **46**, 100–6 (2014).
7. Yang, J., Lee, S. H., Goddard, M. E. & Visscher, P. M. GCTA: a tool for genome-wide complex trait analysis. *Am. J. Hum. Genet.* **88**, 76–82 (2011).
8. Chen, W.-M. & Abecasis, G. R. Family-based association tests for genomewide association scans. *Am. J. Hum. Genet.* **81**, 913–926 (2007).
9. Eriksson, N. *et al.* Web-based, participant-driven studies yield novel genetic associations for common traits. *PLoS Genet.* **6**, e1000993–e1000993 (2010).
10. Wood, A. R. *et al.* Defining the role of common variation in the genomic and biological architecture of adult human height. *Nat. Genet.* **46**, 1173–1186 (2014).
11. Winkler, T. W. *et al.* Quality control and conduct of genome-wide association meta-analyses. *Nat. Protoc.* **9**, 1192–212 (2014).
12. Li, Y., Willer, C. J., Ding, J., Scheet, P. & Abecasis, G. R. MaCH: Using sequence and genotype data to estimate haplotypes and unobserved genotypes. *Genet. Epidemiol.* **34**, 816–834 (2010).
13. Marchini, J., Howie, B., Myers, S., McVean, G. & Donnelly, P. A new multipoint method for genome-wide association studies by imputation of genotypes. *Nat. Genet.* **39**, 906–913 (2007).
14. The 1000 Genomes Project Consortium. An integrated map of genetic variation from 1,092 human genomes. *Nature* **491**, 56–65 (2012).
15. Devlin, B. & Roeder, K. Genomic control for association studies. *Biometrics* **55**, 997–1004 (1999).
16. Weir, B. S. *Genetic Data Analysis* (Sinauer, 1990).
17. Novembre, J. *et al.* Genes mirror geography within Europe. *Nature* **456**, 98–101 (2008).
18. Pistis, G. *et al.* High differentiation among eight villages in a secluded area of Sardinia revealed by genome-wide high density SNPs analysis. *PLoS One* **4**, e4654 (2009).
19. Bulik-Sullivan, B. *et al.* LD Score Regression Distinguishes Confounding from Polygenicity in Genome-Wide Association Studies. *Nat. Genet.* **47**, 291–295 (2015).
20. Willer, C. J., Li, Y. & Abecasis, G. R. METAL: Fast and efficient meta-analysis of genomewide association scans. *Bioinformatics* **26**, 2190–2191 (2010).

21. Chang, C. C. *et al.* Second-generation PLINK: rising to the challenge of larger and richer datasets. *Gigascience* **4**, 7 (2015).
22. Abecasis, G. R. *et al.* An integrated map of genetic variation from 1,092 human genomes. *Nature* **491**, 56–65 (2012).
23. UK Biobank. *Genotyping and Quality Control of UK Biobank, a Large-Scale, Extensively Phenotyped Prospective Resource: Information for Researchers. Interim Data Release.* (2015). at <[http://www.ukbiobank.ac.uk/wp-content/uploads/2014/04/UKBiobank\\_genotyping\\_QC\\_documentation-web.pdf](http://www.ukbiobank.ac.uk/wp-content/uploads/2014/04/UKBiobank_genotyping_QC_documentation-web.pdf)>
24. Sudlow, C. *et al.* UK Biobank: An open access resource for identifying the causes of a wide range of complex diseases of middle and old age. *PLoS Med.* **12**, e1001779 (2015).
25. Marchini, J. *et al.* *Genotype Imputation and Genetic Association Studies of UK Biobank: Interim Data Release.* (2015). at <[https://biobank.ctsu.ox.ac.uk/crystal/docs/impute\\_ukb\\_v1.pdf](https://biobank.ctsu.ox.ac.uk/crystal/docs/impute_ukb_v1.pdf)>
26. Rietveld, C. A. *et al.* Common Genetic Variants Associated with Cognitive Performance Identified Using Proxy-Phenotype Method. *Proc. Natl. Acad. Sci. USA.* **111**, 13790–13794 (2014).

## 2 Testing for Population Stratification

### 2.1 Background

Population stratification is a major concern in genetic-association studies. It can severely bias the estimates for causal variants, or worse, lead to false positives. This can occur if a particular variant of a SNP is more common in one subpopulation than another and if there are mean differences in the phenotype of interest between subpopulations due to factors that do not involve that SNP. Such factors could be either:

1. *Non-genetic factors.* These include cultural or environmental factors; the mechanism through which confounding can arise is illustrated by the famous chopsticks example<sup>1</sup>.
2. *Genetic factors* that do not involve the particular SNP of interest. The GWAS estimate for a SNP will be biased if that SNP varies in frequency across subpopulations and if other causal SNPs also vary in frequency across subpopulations (and are thus in LD with the SNP of interest within the entire population). Note that a bias could arise even if the particular SNP of interest is in perfect linkage equilibrium (LE) within each subpopulation with all causal SNPs that differ in frequency across subpopulations and if there are no mean differences in phenotype due to non-genetic reasons.

To make this discussion precise, we analyze a simple linear model for a quantitative trait  $y_i$  for individual  $i$ :

$$(1) y_i = \sum_{k=1}^p x_{ik} b_k + P_i + \varepsilon_i,$$

where  $x_{ik}$  is individual  $i$ 's genotype at SNP  $k$ ,  $p$  is the number of SNPs in the genome,  $P_i$  is a fixed effect corresponding to the environmental effect of being in the individual's subpopulation, and  $\varepsilon_i$  is the residual and is independent of  $x_i$ . Each estimate  $\hat{\beta}_j$  from a GWAS corresponds to the linear projection of the trait onto the genotype at a single SNP  $j$ . That is, using  $E^*(\cdot | \cdot)$  to denote the linear-projection operator,

$$E^*(y_i | x_{ij}) = E^*\left(\sum_{k=1}^p x_{ik} b_k + P_i + \varepsilon_i | x_{ij}\right) = \beta_j x_{ij},$$

where

$$(2) \beta_j = b_j + \sum_{k \neq j} E^*(x_{ik} | x_{ij}) b_k + E^*(P_i | x_{ij}).$$

If  $x_{ij}$  is stratified by subpopulation and if nongenetic factors (i.e.,  $P_i$ ) vary by subpopulation, then  $E^*(P_i | x_{ij}) \neq 0$ , causing  $\beta_j$  to differ systematically from  $b_j$ . This difference corresponds to the first bias described above. Similarly, if  $x_{ij}$  is stratified by subpopulation and so is a set of causal SNPs with nonzero  $b_k$ 's, then  $E^*(x_{ik} | x_{ij}) \neq 0$  for those  $k$  SNPs—even if the SNPs

are in perfect LE within subpopulations (e.g., even if they are on different chromosomes). This effect will be aggregated across all causal SNPs in the genome that differ in frequency across subpopulations. It is the second source of bias due to population stratification described above.

Several methods have been proposed to correct for these biases and thereby reduce the risk of false positives due to population stratification. These include controlling for the top principal components of the genetic-relatedness matrix (GRM) in the analysis or estimating mixed-linear models. Indeed, almost all cohorts in this GWAS of *EduYears* followed one or the other of these strategies. Nonetheless, there is still some concern that residual stratification could remain. This possibility is particularly concerning in large GWA studies such as this one, where the effects of even a very small amount of stratification bias may be comparable in magnitude to the estimated SNP effect sizes.

This document presents the theory and associated results of the methods we employ to assess whether our GWAS estimates reflect the effects of true polygenic signals or those of population stratification. These methods are a sign test (Supplementary Information section 2.2), the LD Score intercept method (2.3), a decomposition of the variance of the estimated polygenic score (2.4 and 2.5), and a regression of *EduYears* on the polygenic score using only within-family variation (2.6).

## 2.2 WF-GWAS Sign Test

As a first-order consideration, we would like to know if our results are entirely driven by stratification or if our GWAS results in fact capture some true genetic signal. A simple sign test—based on comparing the signs of the GWAS estimates to those of the estimates from a WF analysis—is robust to violations of the many assumptions required for the other tests presented below. If a SNP has no true genetic effect, then the signs of the GWAS and WF estimates will be independent and will be concordant with 50% probability. Hence, if significantly more than 50% of the GWAS estimates for the lead SNPs have concordant signs with the corresponding WF estimates, it is strong evidence that at least some of the lead SNPs uncovered by the GWAS are truly causal. We describe this test more precisely below.

A GWAS estimate for SNP  $j$ ,  $\hat{\beta}_j$ , can be decomposed as

$$\hat{\beta}_j = \beta_j + s_j + U_j,$$

where  $\beta_j$  is the true underlying GWAS parameter for SNP  $j$ ,  $s_j$  is the associated bias due to stratification, and  $U_j$  is the sampling variance of the estimate with  $E(U_j) = 0$ . Since WF estimates of  $\beta_j$  are robust to stratification, a WF estimate for SNP  $j$  can similarly be decomposed as

$$\hat{\beta}_{WF,j} = \beta_j + V_j,$$

where  $V_j$  is the sampling variance of the estimates with  $E(V_j) = 0$ . Note that if  $\hat{\beta}_j$  and  $\hat{\beta}_{WF,j}$  are estimated in independent samples, then  $U_j$  and  $V_j$  will be uncorrelated.

Under the null hypothesis that  $\beta_j = 0$  for all  $j$ , the probability that  $\hat{\beta}_j$  and  $\hat{\beta}_{WF,j}$  have concordant signs is 50%. Therefore, denoting by  $C$  the random variable that corresponds to the count of how many times the signs match for the two estimates, under the null hypothesis,

$$C \sim \text{Binomial}(0.5, S),$$

where  $S$  is the number of SNPs tested. For a given  $S$  and  $\hat{C}$ , we can then calculate the  $P$ -value for a one-sided test that  $C \geq \hat{C}$  under the null hypothesis. We call this test “the sign test.”

The sign test makes virtually no assumptions other than the independence of  $U_j$  and  $V_j$ , which can be ensured by calculating our two estimates in non-overlapping samples. Moreover, this test is robust to bias due to the Winner’s Curse since the Winner’s Curse biases estimates away from zero, therefore not altering the sign. On the other hand, this test is not informative about *how much* stratification there is. It is possible to imagine scenarios where there is a large amount of stratification in our estimates but where the sign test would nevertheless reject the null hypothesis, as long as a sufficient number of SNPs have a moderate causal effect. In summary, rejecting the null hypothesis in the sign test constitutes strong evidence that at least some of the identified SNPs are truly causal, but other tests with stronger assumptions are needed to quantify how much stratification there is.

For our analysis, we calculate the WF estimates of the effects of each lead SNP on *EduYears* using pooled results from the QIMR, STR, MCTFR, and NTR cohorts, combined using an inverse-variance weighted meta-analysis. For the GWAS estimates, we omit these five cohorts and perform a meta-analysis of the remaining cohorts. Thus, the WF estimates are based on a sample size of 5,506 sibling pairs, and the GWAS estimates have a sample size of 271,360 individuals.

Of the 74 lead SNPs, 66 are present in all five datasets used to calculate the WF estimates. Of these 66 SNPs, 41 (62%) had GWAS and WF estimates with concordant signs. This corresponds to a  $P$ -value of 0.032 in a one-sided test; we thus reject the null that the 66 genome-wide significant SNPs are all false positives arising due to stratification.

Although the sign test is statistically significant, the ultimate fraction of matching signs may seem small given the sample sizes available. Using the coefficients from our replication sample, we can estimate the expected number of matching signs under two assumptions: (i) the coefficients we estimate in the UKB equal the true underlying parameter value vector,  $\beta$ ; and (ii) the true within-family parameter values are equal to the true population parameter values  $\beta$  (e.g., there is no bias due to population stratification). Then using the standard errors from the WF analysis,  $\sigma_{WF}$ , and from the GWAS,  $\sigma_{GWAS}$ , we can calculate the probability that SNP  $i$  would have the same sign in a WF and GWAS analysis as

$$P(\text{match}_i) = \Phi\left(-\frac{|\beta_i|}{\sigma_{GWAS,i}}\right) \Phi\left(-\frac{|\beta_i|}{\sigma_{WF,i}}\right) + \left[1 - \Phi\left(-\frac{|\beta_i|}{\sigma_{GWAS,i}}\right)\right] \left[1 - \Phi\left(-\frac{|\beta_i|}{\sigma_{WF,i}}\right)\right].$$

Since these SNPs are (approximately) independent, we then can calculate the expected number of matching signs as

$$\sum_i P(\text{match}_i),$$

with a variance of

$$\sum_i P(\text{match}_i)[1 - P(\text{match}_i)].$$

By this approach we find that the expected number of matching signs is 49.7 out of 66 with a 95% confidence interval from 43.2 SNPs to 56.1 SNPs. Thus the actual number of signs aligned (41 signs) is smaller than expected under the null hypothesis. We therefore reject the joint hypothesis that assumptions (i) and (ii) above both hold.

This discrepancy could be explained by stratification, heterogeneous effects, or some mix of both. We do not think we can convincingly quantify to what extent each of the two factors drives the result. On the one hand, there is clear evidence that the genetic effects are indeed heterogeneous. For example, estimates of the genetic correlation with deCODE are overwhelmingly below 1.00 (Supplementary Table 1.10) and the predictive power of the score varies by cohort in the STR sample (Supplementary Table 7.1 and Supplementary Information section 7). On the other hand, the LD Score regression results in the following subsection suggest that there is some stratification. We therefore view the sign test as providing useful supporting evidence, but overall less informative and definitive than the LD Score regression results, which quantify the degree to which the results are affected by stratification.

### 2.3 LD Score Intercept Test

Following the approach described in Bulik-Sullivan et al.<sup>2</sup>, we use the LDSC software to estimate the intercept in a LD Score regression to assess if our results exhibit signs of population stratification. This approach uses GWAS summary statistics for all measured SNPs.

Unlike the Genomic Control (GC) method, which assumes that confounding bias (e.g., due to population stratification and cryptic relatedness) is responsible for inflation in the GWAS chi-square statistics, the LD Score regression method can disentangle inflation that is due to a true polygenic signal throughout the genome (which affects the slope of the LD Score regression) from inflation that is due to confounding biases such as cryptic relatedness and population stratification (which affects the intercept of the regression).

Formally, the LD Score regression intercept method is based on the relationship

$$E[\chi_j^2] = \frac{Nh^2\ell_j}{M} + Na + 1,$$

where  $\chi_j^2 = N\hat{\beta}_j^2$  is the chi-square statistic from the GWAS for SNP  $j$ ,  $N$  is sample size,  $\ell_j$  is the LD Score of SNP  $j$ ,  $h^2/M$  is the average heritability explained per SNP, and  $a$  is a term that measures the contribution of confounding biases.

Bulik-Sullivan et al. show that: this relationship holds under a polygenic model, the intercept of the regression minus one (i.e.,  $\lambda$ ) is an estimator of the contribution of confounding bias to the inflation of the chi-square statistics, and the intercept equals one (i.e.,  $\lambda$  is equal to 0) under a model without confounding biases.

We used the LDSC software to estimate the regression of the chi-square statistics on  $\ell_j$  and to test whether the estimate of the intercept is significantly different from 1. We use the “eur\_w\_ld\_chr/” files of LD Scores calculated by Finucane et al.<sup>3</sup> and made available on <https://github.com/bulik/ldsc/wiki/Genetic-Correlation>. These LD Scores were computed with genotypes from the European-ancestry samples in the 1000 Genomes Project using only HapMap3 SNPs. Only HapMap3 SNPs with MAF > 0.01 were included in the LD Score regression.

As described in Supplementary Information section 1.6, we applied GC at the cohort level before running the meta-analysis to produce our main GWAS estimates. However, because GC will tend to bias the intercept of the LD Score regression downward, we did not apply GC to the summary statistics we used to estimate the LD Score regression. Furthermore, we excluded the deCODE cohort from the analysis because the cohort-level regression estimates for deCODE did not correct for the high level of relatedness in the sample (their standard procedure is to apply GC). Consequently, including the estimates from deCODE would very likely have led to an intercept that is considerably upward biased. This procedure—estimating the LD Score regression with summary statistics that were not GC’d and excluding the deCODE cohort—allows us to interpret the estimated LD Score regression intercept as an unbiased measure of the amount of stratification there is in the sample, aside from deCODE, that we used for the GWAS.

Running the LD Score regression on these data, we estimate an intercept of 1.0491 (Extended Data Fig. 3a), which is significantly larger than 1 (the standard error reported by the LDSC software is 0.0091). By comparison, the mean  $\chi^2$  statistics for all the SNPs in the LD Score regression is 1.5966. This suggests that there is some confounding bias (due to population stratification, cryptic relatedness, or other confounds) but that it accounts for only a small part of the inflation in the chi-square statistics. Thus, the inflation is largely attributable to true polygenic signal throughout the genome.

We note that the amount of inflation due to confounding bias is likely to be even smaller in our main GWAS results (e.g., in the estimates for the genome-wide significant SNPs) because, as mentioned above, genomic control was applied at the cohort level for that main GWAS<sup>§</sup>.

---

<sup>§</sup> Though genomic control is overly conservative, using it should make little difference for all but the larger cohorts in our sample<sup>4</sup>. To verify this, we re-ran the meta-analysis without the cohort-level genomic control correction and instead applied GC at the meta-analysis level using the LDSC intercept (1.05) as the correction factor. The results changed very little. To be specific, the total count of genome-wide significant SNPs remained 74, the same number we obtained with cohort-level genomic control. The only changes were that one lead SNP on chr2 (rs4851251) was replaced by another SNP (rs72819174) in the same locus (because rs4851251 no longer had the lowest  $P$ -value SNP in the locus), one lead SNP on chr3 (rs112634398) fell just below the genome-wide significance threshold, and one SNP on chr16 (rs1007883) rose just above the genome-wide significance threshold. The remaining 72 lead SNPs were identical.

## 2.4 Decomposition of the Variance of the Polygenic Score—Theory

As a complement to a number of tests that assess if there is population stratification in their data, Wood et al.<sup>5</sup> developed a method to quantify the extent to which the variance of a polygenic score (constructed from GWAS estimates) in an independent validation sample is affected by population stratification in that validation sample. To do so, they decompose the variance of the score into expressions that correspond to the variance due to true genetic effects, the variance due to estimation error, and the variance due to population stratification in the independent validation sample.

Below, we present a more general derivation of their method, where we relax some implicit assumptions they made. In particular:

- We relax the assumption that  $g$  (the total genetic effects of all SNPs) and  $S$  (the bias in the predictor  $\hat{g}$  due to population stratification in the GWAS sample) are uncorrelated<sup>h</sup>;
- Our formula for the sibling correlation between two SNPs that are in linkage disequilibrium accounts for the effect of population stratification;
- We model the estimation error terms' variances and covariances ( $V_e$  and  $C_e$  in Wood et al.) slightly differently<sup>i</sup>.

We obtain equations that are similar to Equations 13-16 in Wood et al. but contain a number of additional terms. Some of these additional terms are likely to be small, but the magnitude of some other terms may be more difficult to assess (because the terms are difficult to interpret). If those additional terms are all relatively small, the crux of the Wood et al. derivations and the analyses underlying the results presented in Supplementary Table 2.1 still hold.

### 2.4.1 The True Genetic Score

We begin with a model that is similar to Wood et al.'s:

$$(3) y = g + P + \varepsilon,$$

where, as in Wood et al.,  $g = \sum_i x_i b_i$  is the genetic score of an individual, and  $\varepsilon$  is the residual. The difference from Wood et al. is that we explicitly model  $P$ , the effect of population stratification. (To be precise,  $P$  is a subpopulation-level fixed effect:  $P_p = P_{p'}$  if persons  $p$  and  $p'$  are from the same subpopulation.) The new term  $P$  may be correlated with  $g$ , but  $\varepsilon$  captures sampling variation and is thus independent of both  $P$  and  $g$ .

We define  $y_1, y_2, g_1,$  and  $g_2$  to be the respective phenotypes and genotypes for sibling pairs. Using this notation, we see that

$$(4) \text{Var}(g) = \sum_{i,j} \text{Cov}(x_i, x_j) b_i b_j$$

and

---

<sup>h</sup> Wood et al. do not model  $S$  directly but they assume that  $b$  is independent of their variable  $e$ ; this assumption is justified if there is no bias in the predictor  $\hat{g}$  due to population stratification in the GWAS sample (among other possible justifications for this assumption).

<sup>i</sup> Our  $V_e$  term is a sum over all pairs of SNPs that are in LD with one another, whereas the  $V_e$  term in Wood et al. is a sum of over all SNPs.



$$(5) \text{Cov}(g_1, g_2) = \sum_{i,j} \text{Cov}(x_{1i}, x_{2j}) b_i b_j$$

Note that the covariance between two SNPs,  $i$  and  $j$ , comes from two sources: LD and population stratification. The former, which we define as  $\text{Cov}_{LD}(x_i, x_j)$ —or the population covariance between a pair of SNPs due to LD—arises due to fact that nearby SNPs tend to be inherited together. It will be equal to zero when  $x_i$  and  $x_j$  are in LE. The population-stratification source of covariance, which we define as  $\text{Cov}_{pop}(x_i, x_j)$ , arises because certain SNPs will be more common in certain subpopulations. Thus

$$(6) \text{Cov}(x_i, x_j) = \text{Cov}_{LD}(x_i, x_j) + \text{Cov}_{pop}(x_i, x_j).$$

As we show in the Box at the end of this subsection, the covariance between two SNPs in two siblings is

$$(7) \text{Cov}(x_{1i}, x_{2j}) = \frac{1}{2} \text{Cov}_{LD}(x_i, x_j) + \text{Cov}_{pop}(x_i, x_j).$$

This expression generalizes the special cases that

$$\text{Cov}(x_{1i}, x_{2j}) = \text{Cov}_{pop}(x_i, x_j)$$

when SNP  $i$  and  $j$  are in LE and that

$$\text{Cov}(x_{1i}, x_{2j}) = \frac{1}{2} \text{Var}_{LD}(x_i) + \text{Var}_{pop}(x_i)$$

when  $i = j$ . (Note that Equation 7 is different than the equivalent equation in Wood et al., who omit the  $\text{Cov}_{pop}(x_i, x_j)$  term for SNPs that are in LD.) The intuition behind Equation 7 is that since siblings share on average half of their parents' DNA, the cross-sibling covariance due to LD is cut in half. On the other hand, since each sibling-pair's parents are from the same subpopulation, the covariance due to population structure will not be diminished when comparing siblings.

## 2.4.2 The Estimated Polygenic Score

Using bold to denote vectors of SNPs, we define  $\hat{\mathbf{b}}$  as the estimate of  $\mathbf{b}$  obtained from the GCTA-COJO method. Given that there may be bias due to stratification in our estimate of  $\mathbf{b}$ , it may be expressed as

$$(8) \hat{\mathbf{b}} = \mathbf{b} + \mathbf{s} + \mathbf{e},$$

where  $\mathbf{s}$  is the bias in the estimate of  $\mathbf{b}$  due to population stratification, and  $\mathbf{e}$  is the estimation error due to sampling variation. The polygenic score for  $y$  can be calculated in an independent validation sample as

$$\hat{g} = \sum_i x_i \hat{b}_i = g + S + E,$$

where  $S \equiv \sum_i x_i s_i$  and  $E \equiv \sum_i x_i e_i$ . We note that  $E$  is independent of  $g$  and  $S$  but that  $g$  and  $S$  may not be independent from one another (for instance, if the true genetic effect  $g$  is correlated across subpopulations with the non-genetic subpopulation effect on the phenotype ( $P$ )).

To simplify our derivations, we now adopt a notational convention: for any vectors  $\alpha$  and  $\beta$ ,

$$\begin{aligned} V_{\alpha\beta,LD} &\equiv \sum_{i,j} \text{Cov}_{LD}(x_i, x_j) \alpha_i \beta_j \mid \text{SNPs are in LD} \\ C_{\alpha\beta,LD} &\equiv \sum_{i,j} \text{Cov}_{LD}(x_i, x_j) \alpha_i \beta_j \mid \text{SNPs are not in LD} \\ V_{\alpha\beta,pop} &\equiv \sum_{i,j} \text{Cov}_{pop}(x_i, x_j) \alpha_i \beta_j \mid \text{SNPs are in LD} \\ C_{\alpha\beta,pop} &\equiv \sum_{i,j} \text{Cov}_{pop}(x_i, x_j) \alpha_i \beta_j \mid \text{SNPs are not in LD.} \end{aligned}$$

We note that  $C_{\alpha\beta,LD}$  is always zero by construction. As in Wood et al., we want to estimate the following quantities:

$$\begin{aligned} V_g &\equiv V_{bb,LD} + V_{bb,pop} \\ C_g &\equiv C_{bb,LD} + C_{bb,pop} = C_{bb,pop} \\ V_e &\equiv V_{ee,LD} + V_{ee,pop} \\ C_e &\equiv C_{ee,LD} + C_{ee,pop} = C_{ee,pop}. \end{aligned}$$

We also define two new quantities:

$$\begin{aligned} V_s &\equiv V_{ss,LD} + V_{ss,pop} \\ C_s &\equiv C_{s,LD} + C_{ss,pop} = C_{ss,pop}. \end{aligned}$$

Using these conventions, we can derive the following equalities using (6) and (7):

$$\begin{aligned} \text{Var}(g) &= V_{bb,LD} + V_{bb,pop} + C_{bb,pop} \\ \text{Cov}(g_1, g_2) &= \frac{1}{2} V_{bb,LD} + V_{bb,pop} + C_{bb,pop} \\ \text{Var}(S) &= V_{ss,LD} + V_{ss,pop} + C_{ss,pop} \\ \text{Cov}(S_1, S_2) &= \frac{1}{2} V_{ss,LD} + V_{ss,pop} + C_{ss,pop} \\ \text{Var}(E) &= V_{ee,LD} + V_{ee,pop} + C_{ee,pop} \\ \text{Cov}(E_1, E_2) &= \frac{1}{2} V_{ee,LD} + V_{ee,pop} + C_{ee,pop} \\ \text{Cov}(g, S) &= V_{bs,LD} + V_{bs,pop} + C_{bs,pop} \\ \text{Cov}(g_1, S_2) &= \frac{1}{2} V_{bs,LD} + V_{bs,pop} + C_{bs,pop}. \end{aligned}$$

### 2.4.3 Re-deriving Equations 13-16 from Wood et al.

Wood et al. estimate  $V_g$ ,  $V_e$ , and  $C_g + C_e$  with the following formulae:

$$\hat{V}_g \equiv \text{Cov}(\Delta y, \Delta \hat{g}) \quad (\text{Wood et al. Equation 13});$$

$$\hat{V}_e \equiv \text{Var}(\Delta \hat{g}) - \hat{V}_g = \text{Var}(\Delta \hat{g}) - \text{Cov}(\Delta y, \Delta \hat{g}) \quad (\text{Wood et al. Equation 14});$$

$$\hat{C}_g + \hat{C}_e \equiv 2\text{Cov}(\hat{g}_1, \hat{g}_2) - \text{Var}(\hat{g}) \quad (\text{Wood et al. Equation 15 \& 16}).$$

Using the more generalized model we present here, we can calculate what these formulae are in fact estimating. We begin by calculating

$$\begin{aligned} \hat{V}_g &= \text{Cov}(\Delta y, \Delta \hat{g}) \\ &= \text{Cov}(\Delta g + \Delta \varepsilon, \Delta g + \Delta S + \Delta E) \\ &= \text{Var}(\Delta g) + \text{Cov}(\Delta g, \Delta S) \\ &= 2\text{Var}(g) - 2\text{Cov}(g_1, g_2) + 2\text{Cov}(g, S) - 2\text{Cov}(g_1, S_2) \\ &= V_{bb,LD} + V_{bs,LD} \\ &= V_g + [V_{bs,LD} - V_{bb,pop}]. \end{aligned}$$

Next, we have

$$\begin{aligned} \hat{V}_e &= \text{Var}(\Delta \hat{g}) - \text{Cov}(\Delta y, \Delta \hat{g}) \\ &= \text{Var}(\Delta g + \Delta s + \Delta E) - (V_{bb,LD} + V_{bs,LD}) \\ &= \text{Var}(\Delta g) + \text{Var}(\Delta s) + \text{Var}(\Delta E) + 2\text{Cov}(\Delta g, \Delta s) - (V_{bb,LD} + V_{bs,LD}) \\ &= (2\text{Var}(g) - 2\text{Cov}(g_1, g_2)) + (2\text{Var}(S) - 2\text{Cov}(S_1, S_2)) + (2\text{Var}(E) - 2\text{Cov}(E_1, E_2)) \\ &\quad + (4\text{Cov}(g, S) - 4\text{Cov}(g_1, S_2)) - (V_{bb,LD} + V_{bs,LD}) \\ &= V_{bb,LD} + V_{ss,LD} + V_{ee,LD} + 2V_{bs,LD} - V_{bb,LD} - V_{bs,LD} \\ &= V_{ss,LD} + V_{ee,LD} + V_{bs,LD} \\ &= V_e + V_s + [V_{bs,LD} - V_{ee,pop} - V_{ss,pop}]. \end{aligned}$$

Further,

$$\begin{aligned} \hat{C}_g + \hat{C}_e &= 2\text{Cov}(\hat{g}_1, \hat{g}_2) - \text{Var}(\hat{g}) \\ &= 2\text{Cov}(g_1 + S_1 + E_1, g_2 + S_2 + E_2) - \text{Var}(g + s + E) \\ &= 2\text{Cov}(g_1, g_2) + 2\text{Cov}(S_1, S_2) + 2\text{Cov}(E_1, E_2) + 4\text{Cov}(g_1, S_2) - \text{Var}(g) - \text{Var}(S) \\ &\quad - \text{Var}(E) - 2\text{Cov}(g, S) \\ &= V_{bb,LD} + 2V_{bb,pop} + 2C_{bb,pop} + V_{ss,LD} + 2V_{ss,pop} + 2C_{ss,pop} + V_{ee,LD} + 2V_{ee,pop} \\ &\quad + 2C_{ee,pop} + 2V_{bs,LD} + 4V_{bs,pop} + 4C_{bs,pop} - V_{bb,LD} - V_{bb,pop} - C_{bb,pop} \\ &\quad - V_{ss,LD} - V_{ss,pop} - C_{ss,pop} - V_{ee,LD} - V_{ee,pop} - C_{ee,pop} - 2V_{bs,LD} - 2V_{bs,pop} \\ &\quad - 2C_{bs,pop} \\ &= V_{bb,pop} + C_{bb,pop} + V_{ss,pop} + C_{ss,pop} + V_{ee,pop} + C_{ee,pop} + 2V_{bs,pop} + 2C_{bs,pop} \\ &= C_g + C_e + C_s + [2C_{bs,pop} + V_{bb,pop} + V_{ss,pop} + V_{ee,pop} + 2V_{bs,pop}]. \end{aligned}$$

In summary, we have

$$(9) \hat{V}_g = V_g + [V_{bs,LD} - V_{bb,pop}]$$

$$(10) \hat{V}_e = V_e + V_s + [V_{bs,LD} - V_{ee,pop} - V_{ss,pop}]$$

$$(11) \hat{C}_g + \hat{C}_e = C_g + C_e + C_s + [2C_{bs,pop} + V_{bb,pop} + V_{ss,pop} + V_{ee,pop} + 2V_{bs,pop}] \hat{C}_g + \hat{C}_e = C_g + C_e + C_s$$

#### 2.4.4 Discussion

The original analysis in *Equations 1-20* of Wood et al. aimed “to quantify the fraction of phenotypic variance explained by SNPs selected from the GCTA-COJO analyses of the meta-analysis data ... and to quantify the accuracy of predicting height using these selected SNPs.” In this paper, we use this analysis to produce Supplementary Table 2.1.

In light of the above derivations, it may still be possible to interpret these figures in the spirit of Wood et al. if the new terms that now appear on RHS of Equations (9)-(11) can either (i) be assumed to be very small or (ii) be given a meaningful interpretation. We make the following observations:

- *Observation 1:* the  $V_{\dots,pop}$  terms represent the amount of variance associated with the SNPs that are in LD that is due to population structure. In European-ancestry populations such as those from which our data are drawn,  $F_{st}$  has been estimated to be small<sup>6</sup>, which may suggest that the  $V_{\dots,pop}$  terms are small. If we can assume these  $V_{\dots,pop}$  terms to be small relative to the other terms, Equations (9)-(11) simplify significantly, to:

$$(9^*) \hat{V}_g = V_g + [V_{bs,LD}]$$

$$(10^*) \hat{V}_e = V_e + V_s + [V_{bs,LD}]$$

$$(11^*) \hat{C}_g + \hat{C}_e = C_g + C_e + C_s + [2C_{bs,pop}]$$

- *Observation 2:* defining  $\mathbf{e}' \equiv \mathbf{e} + \mathbf{s}$ ,  $V_{e'} \equiv V_e + V_s$ , and  $C_{e'} \equiv C_e + C_s$ , we can express these equations as:

$$(9^{**}) \hat{V}_g = V_g + [V_{bs,LD}]$$

$$(10^{**}) \hat{V}_e = V_{e'} + [V_{bs,LD}]$$

$$(11^{**}) \hat{C}_g + \hat{C}_e = C_g + C_{e'} + [2C_{bs,pop}]$$

Here,  $\mathbf{e}'$  is the estimation error in  $\mathbf{b}$  due to both population stratification and sampling variation<sup>j</sup>; it is unfortunately not possible to disentangle these two sources of estimation error with this method.

- *Observation 3:* the  $V_{bs,LD}$  and  $C_{bs,pop}$  terms capture the correlation between  $g$  and  $S$  (the bias in  $\hat{g}$  due to population stratification). It is possible to imagine conditions under which these terms would not be small. For instance, if subpopulations with a larger average  $g$  tend to have a higher  $P$  (i.e., a better environment for the trait  $y$ ), then  $g$  and  $S$  will tend to be positively correlated. However, it is also possible to imagine conditions under which these terms would be small or zero; in particular, if the score  $\hat{g}$  is not biased by population stratification, then  $S = 0$  and  $V_{bs,LD} = C_{bs,pop} = 0$ . In practice, it is difficult to assess how large the  $V_{bs,LD}$  and  $C_{bs,pop}$  terms are our data.

<sup>j</sup> Our  $V_{e'}$  and  $C_{e'}$  terms are slightly different from Wood et al.'s  $V_e$  and  $C_e$  terms because the sum in  $V_{e'}$  is over all SNPs that are in LD and the sum in  $C_{e'}$  is over all SNPs that are not in LD.

Hence, we see that the estimators  $\hat{V}_g$ ,  $\hat{V}_e$ , and  $\hat{C}_g + \hat{C}_e$  in Fig. 2 in Wood et al. and Supplementary Table 2.1 in this paper will be unbiased estimates (or nearly so) of  $V_g$ ,  $V_{e'}$ , and  $C_g + C_{e'}$  if (1) we can assume the  $V_{\cdot, pop}$  terms to be small; (2) we properly interpret  $\hat{V}_e$  and  $\hat{C}_e$  as estimates of  $V_{e'}$  and  $C_{e'}$ ; and (3) the  $V_{bs, LD}$  and  $C_{bs, pop}$  terms are small.

It is important to note that large estimates of  $C_g$  and  $C_e$  do *not* imply that the score and the estimates from the GWAS are biased due to population stratification; indeed,  $\hat{C}_g$  and  $\hat{C}_e$  do not depend on  $S$  (the bias in the predictor  $\hat{g}$  due to population stratification in the GWAS sample) and may be sizeable even when  $S = 0$ .  $C_g$  captures the extent to which  $\text{Var}(g)$  is inflated due to the real effects of SNPs that are not in LD but are correlated in the independent validation sample owing to population stratification in that sample.

As we show in Supplementary Information section 2.6, if  $C_g$  or  $C_e$  are nonzero and even if the score is unbiased ( $S = 0$ ), the estimate of the coefficient on the score in an individual-level regression of the phenotype  $y$  on the score will be different from the corresponding estimate in a WF regression.

**PROOF** that  $\text{Cov}(x_{1i}, x_{2j}) = \frac{1}{2} \text{Cov}_{LD}(x_i, x_j) + \text{Cov}_{pop}(x_i, x_j)$ .

Let  $x_i = X_i^F + X_i^M$ , where  $X_i^F$  and  $X_i^M$  are the alleles inherited from the father  $F$  and the mother  $M$ , who are in the same subpopulation (we assume no assortative mating).

Observe that

$$\begin{aligned} \text{Cov}_{LD}(x_i, x_j) &= \text{Cov}_{LD}(X_i^F + X_i^M, X_j^F + X_j^M) \\ &= \text{Cov}_{LD}(X_i^F, X_j^F) + \text{Cov}_{LD}(X_i^M, X_j^M) = 2\text{Cov}_{LD}(X_i, X_j) \end{aligned}$$

and that

$$\begin{aligned} \text{Cov}_{pop}(x_i, x_j) &= \text{Cov}_{pop}(X_i^F + X_i^M, X_j^F + X_j^M) \\ &= \text{Cov}_{pop}(X_i^F, X_i^F) + \text{Cov}_{pop}(X_i^M, X_i^M) + 2\text{Cov}_{pop}(X_i^F, X_i^M) = 4\text{Cov}_{pop}(X_i, X_j) \end{aligned}$$

(since  $M$  and  $F$  are from the same subpopulation).

It follows that

$$\begin{aligned} \text{Cov}(x_{1i}, x_{2j}) &= \text{Cov}(X_{1i}^F + X_{1i}^M, X_{2j}^F + X_{2j}^M) \\ &= \text{Cov}(X_{1i}^F, X_{2j}^F) + \text{Cov}(X_{1i}^M, X_{2j}^M) + 2\text{Cov}(X_{1i}^F, X_{2j}^M) \\ &= 2\text{Cov}(X_{1i}^F, X_{2j}^F) + 2\text{Cov}_{pop}(X_i, X_j) \\ &= 2E[X_{1i}^F \cdot X_{2j}^F] + 2\text{Cov}_{pop}(X_i, X_j) \\ &= 2 \left( \frac{1}{2} \text{Cov}(X_{1i}^F, X_{2j}^F | X_{1i}^F, X_{2j}^F \text{ are from same grandparent}) \right. \\ &\quad \left. + \frac{1}{2} \text{Cov}(X_{1i}^F, X_{2j}^F | X_{1i}^F, X_{2j}^F \text{ are from diff. grandparent}) \right) + \frac{1}{2} \text{Cov}_{pop}(x_i, x_j) \\ &= \left( \text{Cov}(X_i^F, X_j^F) + \text{Cov}_{pop}(X_i, X_j) \right) + \frac{1}{2} \text{Cov}_{pop}(x_i, x_j) \\ &= \left( \left( \text{Cov}_{LD}(X_i, X_j) + \text{Cov}_{pop}(X_i, X_j) \right) + \text{Cov}_{pop}(X_i, X_j) \right) + \frac{1}{2} \text{Cov}_{pop}(x_i, x_j) \\ &= \frac{1}{2} \text{Cov}_{LD}(x_i, x_j) + \text{Cov}_{pop}(x_i, x_j). \end{aligned}$$

The equality on the second line follows from the fact that  $\text{Cov}(X_{1i}^F, X_{2j}^F) = \text{Cov}(X_{1i}^M, X_{2j}^M)$ , and the equality on the third line holds because the variables are assumed to have mean zero.

## 2.5 Decomposition of the Variance of the Polygenic Score—Results

To estimate  $\hat{V}_g$ ,  $\hat{V}_e$ , and  $\hat{C}_g + \hat{C}_e$  as per Equations 13-16 from Wood et al., we used data on DZ twins from the Swedish Twin Registry (STR). There are 3515 DZ twins with both genotype and EA phenotype data, and the phenotypic correlation between DZ twins is 0.414, before adjustments for age and sex. The phenotype *EduYears* was adjusted for age in each gender

group in each cohort separately and then standardized. The genotypes of all the individuals were imputed to 1000G reference panels. We estimated the principal components (PCs) from all the common variants on HapMap3 using GCTA<sup>7,8</sup>. We constructed polygenic scores (also known as “genetic predictors”) using the variants selected by GCTA-COJO and using their effect sizes re-estimated by GCTA-COJO. Supplementary Information section 5 provides more details on how the polygenic scores were constructed.

We estimated  $\hat{V}_g$ ,  $\hat{V}_e$ , and  $\hat{C}_g + \hat{C}_e$  using polygenic scores calculated with sets of SNPs meeting several different threshold  $P$ -values ( $5 \times 10^{-8}$ ,  $5 \times 10^{-7}$ ,  $5 \times 10^{-6}$ ,  $5 \times 10^{-5}$ ,  $5 \times 10^{-4}$ ) without adjusting for the PCs. We then replicated this analysis, this time adjusting the polygenic scores for the first 10 PCs.

Supplementary Table 2.1 show that  $\hat{C}_g + \hat{C}_e$  is very small regardless of whether the predictor is adjusted for PCs or not. As discussed in the preceding subsection, if we can assume that the  $V_{\dots, pop}$  terms are small (*Observation 1*), if we interpret  $\hat{C}_e$  as an estimator of  $C_{e'} = C_e + C_s$  (*Observation 2*), and if we can assume that the  $V_{bs, LD}$  and  $C_{bs, pop}$  terms are small (*Observation 3*), the results thus suggest that population structure in the STR does not account for much of the variance of the polygenic score.

## 2.6 Significance of the Polygenic Scores in a WF regression

To test the robustness of our all-SNPs polygenic score and of the polygenic scores calculated with sets of SNPs meeting several different threshold  $P$ -values ( $5 \times 10^{-8}$ ,  $5 \times 10^{-7}$ ,  $5 \times 10^{-6}$ ,  $5 \times 10^{-5}$ ,  $5 \times 10^{-4}$ ), we estimated WF regressions of *EduYears* on each polygenic score in samples that are independent from those used to construct the scores. Details of how these scores were constructed are found in Supplementary Information section 5. For each WF regression, we also compared the estimated coefficient on the polygenic score to the corresponding coefficient from individual-level regressions.

Formally, let  $y$  denote the phenotype *EduYears*. As Wood et al. show, if we estimate the regression  $y = \hat{g}\beta + \varepsilon$  (where  $y$  is *EduYears*,  $\hat{g}$  is the polygenic score, and  $\varepsilon$  is the error term) in an independent replication sample of individuals, then

$$\hat{\beta}_{Levels} = \frac{\text{Cov}(y, \hat{g})}{\text{Var}(\hat{g})} = \frac{V_g + C_g}{V_g + V_e + C_g + C_e}.$$

(We assume, as Wood et al. implicitly do, that  $S = 0$  and that  $\text{Cov}(g, P) = 0$ .)

However, if we estimate this regression using only the WF variation,  $\dot{y} = \dot{\hat{g}}\beta + \varepsilon$  (where  $\dot{y} = \Delta y$  and  $\dot{\hat{g}} = \Delta \hat{g}$ ), then

$$\hat{\beta}_{WF} = \frac{\text{Cov}(\dot{y}, \dot{\hat{g}})}{\text{Var}(\dot{\hat{g}})} = \frac{V_g}{V_g + V_e}.$$

(We assume, as Wood et al. implicitly do, that  $S = 0$  and that the  $V_{\dots, pop}$  terms are negligible).

Thus, we see that if  $C_g$  or  $C_e$  are nonzero and even if the score is unbiased ( $S = 0$ ), the estimate of the coefficient on the score in an individual-level regression of  $y$  on the score will be different from the corresponding estimate in a WF regression. As Supplementary Table

2.1 shows, estimates of  $C_g$  are quite sizeable relative to estimates of  $V_g$  for the scores based on less significant SNPs, so we expect to see  $\hat{\beta}_{WF}$  to be smaller relative to  $\hat{\beta}_{Levels}$  for the scores based on less significant SNPs.

Importantly, because we estimated both the individual-level and the WF regressions in samples that are independent of those used to construct the score, the estimates  $\hat{\beta}_{WF}$  and  $\hat{\beta}_{Levels}$  will differ from zero if and only if the scores capture at least some true effects of the SNPs.

For both our all-SNPs polygenic score and the polygenic scores calculated with sets of SNPs meeting several different threshold  $P$ -values, we estimated individual-level and WF regressions in the subset of DZ twin pairs in the STR, controlling for age, age squared, and gender. To make the estimated coefficients directly comparable, we used the exact same sample of DZ twin pairs for all regressions. There were 2,722 DZ twin pairs with both genotype and EA phenotype data.

Extended Data Fig. 3b and Supplementary Table 2.2 report the results. For every polygenic score, the estimated coefficient on the polygenic score from the WF regression is statistically distinguishable from zero, further confirming that our GWAS uncovered some true polygenic signal. As expected, the estimated individual-level coefficient is significantly larger than the WF coefficient for the scores based on less significant SNPs, which is consistent with  $C_g$  being sizeable for those scores in the STR.<sup>k</sup> Thus, these results indicate that the score captures true polygenic signal but do not allow us to draw firm conclusions about the extent to which the score is biased due to population stratification.

(We note that it is difficult to compare the  $R^2$ 's from the individual-level and WF regressions, since the  $R^2$  from the latter depends on both the covariance between the polygenic scores and between the error terms within twin pairs, which are not known quantities; for that reason, we refrain from doing such a comparison.)

## References

1. Hamer, D. H. Beware the chopsticks gene. *Mol. Psychiatry* **5**, 11–13 (2000).
2. Bulik-Sullivan, B. *et al.* LD Score regression distinguishes confounding from polygenicity in genome-wide association studies. *Nat. Genet.* **47**, 291–295 (2014).
3. Finucane, H. K. *et al.* Partitioning heritability by functional category using GWAS summary statistics. *Nat. Genet.* **47**, 1228–1235.
4. Yang, J. *et al.* Genomic inflation factors under polygenic inheritance. *Eur. J. Hum. Genet.* **19**, 807–812 (2011).
5. Wood, A. R. *et al.* Defining the role of common variation in the genomic and biological architecture of adult human height. *Nat. Genet.* **46**, 1173–1186 (2014).

---

<sup>k</sup> We note, however, that there are other possible explanations for the wedge between the individual-level and WF coefficients. For example, if the polymorphic sites that affect *EduYears* operate partly by making one's household more amenable to its members' pursuit of education, or if parents tend to either attenuate or accentuate differences between their children, then the individual-level and WF coefficients will differ.



6. McEvoy, B. P. *et al.* Geographical structure and differential natural selection among North European populations. *Genome Res.* **19**, 804–814 (2009).
7. Yang, J., Lee, S. H., Goddard, M. E. & Visscher, P. M. GCTA: a tool for genome-wide complex trait analysis. *Am. J. Hum. Genet.* **88**, 76–82 (2011).
8. Price, A. L. *et al.* Principal components analysis corrects for stratification in genome-wide association studies. *Nat. Genet.* **38**, 904–909 (2006).

## 3 Genetic Overlap

### 3.1 Introduction

Previous work using twin data suggests that educational attainment may share genetic pathways in common with other phenotypes<sup>1–5</sup>. Here, we follow our pre-registered analysis plan (<https://osf.io/p95cq/>) to explore such relationships further using GWAS results.

As a first step, we estimate genetic overlap between EA and several other phenotypes. We define genetic overlap as the degree to which common regions of the genome are associated with different traits, i.e., the extent to which multiple phenotypes are associated with the same underlying genetic variants. Instead of relying on family data or individual-level genetic data, we estimate genetic overlap using the LD Score Regression procedure developed by Bulik-Sullivan et al<sup>6</sup>. Note that this procedure does not require that the GWAS samples are independent. In addition, we develop another SNP-based estimate of genetic overlap based on different assumptions that requires GWAS results from independent samples as inputs. This new measure of genetic overlap is conceptually similar, but not identical, to the measure estimated in bivariate GREML<sup>7</sup>. We compare the different measures of genetic overlap theoretically and empirically.

Next, we systematically investigate evidence of genetic overlap between EA and phenotypes related to (1) mental health and psychometric traits (including general cognitive performance and neuroticism), (2) brain anatomy, and (3) anthropometric traits. Henceforth, we refer to these phenotypes collectively as “MHBA” phenotypes. We chose to include in the analysis phenotypes for which the *phenotypic* correlation between EA and the trait has previously been established<sup>1</sup> and GWAS summary statistics of the trait are available in the public domain. The final list of phenotypes includes: Alzheimer’s disease<sup>8</sup>, bipolar disorder<sup>9</sup>, schizophrenia<sup>10</sup>, cognitive performance<sup>11,12</sup>, neuroticism<sup>13</sup>, volumes of subcortical brain regions and total intracranial volume<sup>14,m</sup>, BMI<sup>15</sup>, and height<sup>16</sup>. The links we used to access the GWAS results for these traits are listed in Supplementary Table 3.1.

We complement our estimates of SNP-based genetic overlap by looking up the lead (i.e., genome-wide significant) EA-associated SNPs in the GWAS results for the MHBA phenotypes.

---

<sup>1</sup> Evidence for phenotypic correlation with EA has previously been reported for Alzheimer’s disease<sup>70–77</sup>, bipolar disorder<sup>19,20,55</sup>, schizophrenia<sup>52,54,55,59,78,60</sup>, cognitive performance<sup>12,79,80</sup>, neuroticism<sup>32,81,82</sup>, hippocampus<sup>83,84</sup>, caudate<sup>85</sup>, brain volume<sup>4,86–88</sup>, BMI<sup>37–41</sup>, and height<sup>89–94</sup>.

<sup>m</sup> The ENIGMA2<sup>14</sup> GWAS summary statistics that were available to us also included the amygdala. However, we omit the amygdala from our analyses because estimates of genetic overlap between EA and amygdala volume result in a negative heritability estimate, whereas heritability estimates should, by definition, be restricted to the 0–1 interval. Because the estimated heritability is negative, both estimates of genetic overlap we report are undefined for this phenotype. The obtained estimate is imprecisely estimated, suggesting that the negative sign may be due to lack of statistical power in the original GWA study.

## 3.2 Estimating Genetic Overlap

### 3.2.1 An Approach Based on Z-statistics from GWAS Meta-Analysis in Independent Samples

There are several ways that one might measure genetic overlap. Below we define a measure based on the correlation of SNPs' (true) effect sizes for two traits. We then develop an asymptotically unbiased estimator of our genetic-overlap parameter that is only a function of GWAS summary statistics. Advantages of our measure include: (1) it has a straightforward interpretation (it is the correlation of GWAS parameters), (2) it requires only GWAS summary statistics (not individual-level data), and (3) it is computationally fast to estimate.

#### 3.2.1.1 Theoretical Framework

In order to define our measure, we let  $Y_i$  and  $Z_i$ , denote the values of two phenotypes for some individual  $i$ . Projecting these phenotypes onto a constant and the genotype for a single SNP  $j$  gives us the population parameters corresponding to a GWAS analysis (i.e., a set of univariate regressions). More precisely, for each SNP  $j$ , consider the population regressions

$$\begin{aligned} Y_i &= \beta_{0,j} + g_{i,j}\beta_j + \varepsilon_{Yij} \\ Z_i &= \alpha_{0,j} + g_{i,j}\alpha_j + \varepsilon_{Zij}, \end{aligned}$$

where  $g_{i,j}$  is the genotype of SNP  $j$  for individual  $i$  as measured by the allele count for a particular reference allele at the locus. Let  $\text{Var}(\varepsilon_{Yij}) = \sigma_{Yj}^2$  and  $\text{Var}(\varepsilon_{Zij}) = \sigma_{Zj}^2$ . Define  $\boldsymbol{\beta}$  to be the vector of all of the  $\beta_j$ 's,  $\boldsymbol{\alpha}$  to be the vector of all of the  $\alpha_j$ 's, and  $\boldsymbol{g}_i$  to be the vector of all of the  $g_{i,j}$ 's, where all the vectors have length  $p$ . Finally, denote the variance-covariance matrix of  $\boldsymbol{g}_i$  by  $\boldsymbol{\Omega}_g$ , and let  $\boldsymbol{D}_g$  denote the matrix of diagonal entries of  $\boldsymbol{\Omega}_g$ .

We define our measure of genetic overlap to be

$$r \equiv \frac{\boldsymbol{\beta}' \boldsymbol{D}_g \boldsymbol{\alpha}}{\sqrt{\boldsymbol{\beta}' \boldsymbol{D}_g \boldsymbol{\beta} \boldsymbol{\alpha}' \boldsymbol{D}_g \boldsymbol{\alpha}}}$$

We note that this measure is independent of whether or not the genotypes are measured in standard-deviation units. To see this, suppose we calculate our measure using as the transformed genotypes  $\tilde{g}_{i,j} \equiv g_{i,j}/D_{jj}^{1/2}$ . In that case, the model becomes

$$\begin{aligned} Y_i &= \beta_{0,j} + (\tilde{g}_{i,j})(D_{jj}^{1/2}\beta_j) + \varepsilon_{Yij} \\ Z_i &= \alpha_{0,j} + (\tilde{g}_{i,j})(D_{jj}^{1/2}\alpha_j) + \varepsilon_{Zij}. \end{aligned}$$

Defining  $\tilde{\boldsymbol{\beta}} \equiv \boldsymbol{D}_g^{1/2}\boldsymbol{\beta}$  and  $\tilde{\boldsymbol{\alpha}} \equiv \boldsymbol{D}_g^{1/2}\boldsymbol{\alpha}$ , we calculate  $r$  to be

$$r = \frac{\tilde{\boldsymbol{\beta}}' \tilde{\boldsymbol{\alpha}}}{\sqrt{\tilde{\boldsymbol{\beta}}' \tilde{\boldsymbol{\beta}} \tilde{\boldsymbol{\alpha}}' \tilde{\boldsymbol{\alpha}}}}$$

where  $\mathbf{D}_g$  vanishes from the expression because it is now the identity matrix. This value of  $r$  is clearly the same as before.

There are at least two ways to interpret this measure:

1. It is the correlation of the effect sizes  $\tilde{\boldsymbol{\beta}}$  and  $\tilde{\boldsymbol{\alpha}}$  that are associated with genotypes measured in standard-deviation units. To be precise, it is the “uncentered correlation”: the formula used for correlation when the variables have mean zero (even though  $\tilde{\boldsymbol{\beta}}$  and  $\tilde{\boldsymbol{\alpha}}$  may not have mean zero). Below, we discuss some justifications for uncenteredness.
2. Alternatively, it may be thought of as a weighted, uncentered correlation of  $\boldsymbol{\beta}$  and  $\boldsymbol{\alpha}$  that gives greater weight to  $(\beta_j, \alpha_j)$  pairs that correspond to SNPs whose genotypes have greater variance.

Note that our measure of genetic overlap,  $r$ , has some intuitive properties: the genetic overlap of a trait with itself is equal to one, the genetic overlap of two traits that share no associated SNPs is equal to zero, and the genetic overlap of two traits where every SNP has an opposite effect is negative one.

Our measure also has the property that  $E[\alpha_j | r, \beta_j] = Cr\beta_j$ , where  $C$  is a scaling constant equal to the ratio of the variance of  $\alpha_j$  to the variance of  $\beta_j$ . That is, if two traits exhibit high genetic overlap as measured by  $r$  and one trait is strongly associated with some SNP, then the other trait will also be likely to be associated with that SNP—and the predicted magnitude of the association is a linear function of the magnitude of the association for the first trait.

As noted above, our measure of genetic overlap is an *uncentered* correlation. The choice of using an uncentered correlation was made for both practical and theoretical reasons. While the magnitudes of  $\beta_j$  and  $\alpha_j$  (the effect sizes corresponding to SNP  $j$ ) are constant, their signs are determined by the arbitrary choice of reference allele. Using the uncentered correlation makes  $r$  invariant to the choice of reference allele for each SNP, which is a desirable property of a genetic overlap parameter.<sup>11</sup> As a theoretical justification for this property, if we think of each  $\beta_j$  and  $\alpha_j$  as random variables that have fixed magnitudes but whose reference allele is random with an equal chance of being either allele, the expected value of  $\beta_j$  and  $\alpha_j$  will indeed be zero.

We further highlight that  $r$  is a population parameter and not a sample statistic (since it is a function of population parameters). In the following subsection, we will discuss how one might estimate the parameter  $r$  using GWAS data.

---

<sup>11</sup> Imagine that we switch reference allele at SNP  $j$ . This will flip the sign of  $\beta_j$  and  $\alpha_j$ . Using an uncentered correlation, this transformation of  $r$  will cancel itself out since every instance of  $\beta_j$  and  $\alpha_j$  is either squared or multiplied with each other. If we instead used a centered correlation, switching the reference allele would not only flip the sign of the relevant  $\beta_j$  and  $\alpha_j$ , but it would also cause the mean of  $\boldsymbol{\beta}$  and  $\boldsymbol{\alpha}$  to shift slightly. The impact of this shift on  $r$  would depend on how  $\beta_j$ ,  $\alpha_j$ , the mean of  $\boldsymbol{\beta}$ , and the mean of  $\boldsymbol{\alpha}$  all compare to one another.

### 3.2.1.2 Estimation

If the true parameters  $\boldsymbol{\beta}$ ,  $\boldsymbol{\alpha}$ , and  $\mathbf{D}$  were known, calculating  $r$  would be straightforward. Here, however, we will show that simply taking the sample analog of  $r$ —the uncentered correlation of the  $t$ -statistics from the GWAS analyses of the two traits—would yield an attenuated estimate of  $r$ . Intuitively, the sampling errors in the estimates of  $\boldsymbol{\beta}$  and  $\boldsymbol{\alpha}$  generate an attenuation bias analogous to what occurs in regression analyses when there is measurement error in the independent variable. However, we will also show that the degree of attenuation is a function of the amount of sampling variance in the sum of the  $t$ -statistics. This sum is simply equal to the number of SNPs used in the analysis, which is known, and therefore the attenuation bias can be corrected for.

To begin, we define the variables that we will use in our analysis. We first assume that  $\boldsymbol{\beta}$  and  $\boldsymbol{\alpha}$  are estimated from non-overlapping samples of size  $n_Y$  and  $n_Z$ , respectively. Therefore, we can express the GWAS estimates as

$$\begin{aligned}\widehat{\boldsymbol{\beta}} &= \boldsymbol{\beta} + \mathbf{U} \\ \widehat{\boldsymbol{\alpha}} &= \boldsymbol{\alpha} + \mathbf{V},\end{aligned}$$

where  $\mathbf{U}$  and  $\mathbf{V}$  are the estimation errors. By the properties of OLS,  $E(\mathbf{U}) = E(\mathbf{V}) = \mathbf{0}$ ,  $\text{Var}(U_j) = \frac{\sigma_{Yj}^2}{n_Y D_{jj}}$ , and  $\text{Var}(V_j) = \frac{\sigma_{Zj}^2}{n_Z D_{jj}}$ . Since  $\widehat{\boldsymbol{\beta}}$  and  $\widehat{\boldsymbol{\alpha}}$  are estimated from non-overlapping samples,  $\mathbf{U}$  and  $\mathbf{V}$  are independent. Throughout the following derivation, we often use the approximations  $\sigma_{Yj}^2 \approx \text{Var}(Y_i)$  and  $\sigma_{Zj}^2 \approx \text{Var}(Z_i)$ . These approximations hold because the variance explained by any individual SNP is very small relative to the residual variance of the phenotype ( $\sigma_{Yj}^2$  or  $\sigma_{Zj}^2$ ).

Define  $\mathbf{S}_\beta$  to be the diagonal matrix whose entries are the standard errors for  $\widehat{\boldsymbol{\beta}}$ , and define  $\mathbf{S}_\alpha$  analogously. Thus,  $\mathbf{S}_\beta^{-1}\widehat{\boldsymbol{\beta}}$  and  $\mathbf{S}_\alpha^{-1}\widehat{\boldsymbol{\alpha}}$  are the vectors of  $t$ -statistics for  $\widehat{\boldsymbol{\beta}}$  and  $\widehat{\boldsymbol{\alpha}}$ . By the properties of OLS,

$$\begin{aligned}S_{\beta jj} &= \sqrt{\frac{\sigma_{\varepsilon Y}^2}{n_Y - 2} \frac{K_{\beta j}}{W_{\beta j}}} \\ S_{\alpha jj} &= \sqrt{\frac{\sigma_{\varepsilon Z}^2}{n_Z - 2} \frac{K_{\alpha j}}{W_{\alpha j}}}\end{aligned}$$

where

$$\begin{aligned}K_{\beta j} &\sim \chi_{n_Y - 2}^2 \\ K_{\alpha j} &\sim \chi_{n_Z - 2}^2 \\ W_{\beta j} &\sim W(D_{jj}, n_Y) \\ W_{\alpha j} &\sim W(D_{jj}, n_Z)\end{aligned}$$

with  $W(\cdot)$  being the Wishart distribution. Also by the properties of OLS, the random variables  $\mathbf{U}$ ,  $\mathbf{V}$ ,  $\mathbf{S}_\beta$ , and  $\mathbf{S}_\alpha$  are all independent.

With this setup, first note that a naïve estimator of  $r$  is

$$\hat{r}_{naive} = \frac{\hat{\boldsymbol{\beta}}' \mathbf{S}_{\beta}^{-1} \mathbf{S}_{\alpha}^{-1} \hat{\boldsymbol{\alpha}}}{\sqrt{(\hat{\boldsymbol{\beta}}' \mathbf{S}_{\beta}^{-2} \hat{\boldsymbol{\beta}})(\hat{\boldsymbol{\alpha}}' \mathbf{S}_{\alpha}^{-2} \hat{\boldsymbol{\alpha}})}}$$

We see that the denominator will contain expressions of the form  $\hat{\beta}_j^2$ . Since these expressions include estimation error, they will be larger in expectation than their population analogue  $\beta_j$ . The naïve estimator would therefore suffer from an attenuation bias:  $|E(\hat{r}_{naive})| < |r|$ .

We instead use as our estimator an adjusted version of the naïve estimator, in which the number of SNPs in our analysis,  $p$ , is subtracted from each term in the denominator:

$$\hat{r} = \frac{\hat{\boldsymbol{\beta}}' \mathbf{S}_{\beta}^{-1} \mathbf{S}_{\alpha}^{-1} \hat{\boldsymbol{\alpha}}}{\sqrt{(\hat{\boldsymbol{\beta}}' \mathbf{S}_{\beta}^{-2} \hat{\boldsymbol{\beta}} - p)(\hat{\boldsymbol{\alpha}}' \mathbf{S}_{\alpha}^{-2} \hat{\boldsymbol{\alpha}} - p)}}$$

Intuitively, the amount of measurement error in each SNP's estimated coefficient  $\hat{\beta}_j$  is its standard error,  $S_{\beta jj}$ . Put more formally,  $\hat{\beta}_j^2$  will, in expectation, overestimate  $\beta_j^2$  by the amount  $S_{\beta jj}^2$ . Thus, the squared estimated coefficient measured in standard-deviation units,  $\hat{\beta}_j^2 / S_{\beta jj}^2$ , will overestimate  $\beta_j^2 / S_{\beta jj}^2$  by 1. Adding up across the SNPs in the analysis gives a total amount of error of  $p$ . Thus, subtracting  $p$  debiases the estimate of the first term in the denominator. Similarly for the second term.

In what follows, we prove asymptotic unbiasedness of  $\hat{r}$  formally. To begin:

$$\begin{aligned} E(\hat{r}) &= E \left[ \frac{\hat{\boldsymbol{\beta}}' \mathbf{S}_{\beta}^{-1} \mathbf{S}_{\alpha}^{-1} \hat{\boldsymbol{\alpha}}}{\sqrt{(\hat{\boldsymbol{\beta}}' \mathbf{S}_{\beta}^{-2} \hat{\boldsymbol{\beta}} - p)(\hat{\boldsymbol{\alpha}}' \mathbf{S}_{\alpha}^{-2} \hat{\boldsymbol{\alpha}} - p)}} \right] \\ &= E \left[ \frac{(\boldsymbol{\beta}' + \mathbf{U}') \mathbf{S}_{\beta}^{-1} \mathbf{S}_{\alpha}^{-1} (\boldsymbol{\alpha} + \mathbf{V})}{\sqrt{[(\boldsymbol{\beta}' + \mathbf{U}') \mathbf{S}_{\beta}^{-2} (\boldsymbol{\beta} + \mathbf{U}) - p][(\boldsymbol{\alpha}' + \mathbf{V}') \mathbf{S}_{\alpha}^{-2} (\boldsymbol{\alpha} + \mathbf{V}) - p]}} \right] \\ &= E \left[ \frac{\boldsymbol{\beta}' \mathbf{S}_{\beta}^{-1} \mathbf{S}_{\alpha}^{-1} \boldsymbol{\alpha} + \mathbf{U}' \mathbf{S}_{\beta}^{-1} \mathbf{S}_{\alpha}^{-1} \boldsymbol{\alpha} + \boldsymbol{\beta}' \mathbf{S}_{\beta}^{-1} \mathbf{S}_{\alpha}^{-1} \mathbf{V} + \mathbf{U}' \mathbf{S}_{\beta}^{-1} \mathbf{S}_{\alpha}^{-1} \mathbf{V}}{\sqrt{(\boldsymbol{\beta}' \mathbf{S}_{\beta}^{-2} \boldsymbol{\beta} + 2\mathbf{U}' \mathbf{S}_{\beta}^{-2} \boldsymbol{\beta} + \mathbf{U}' \mathbf{S}_{\beta}^{-2} \mathbf{U} - p)(\boldsymbol{\alpha}' \mathbf{S}_{\alpha}^{-2} \boldsymbol{\alpha} + 2\mathbf{V}' \mathbf{S}_{\alpha}^{-2} \boldsymbol{\alpha} + \mathbf{V}' \mathbf{S}_{\alpha}^{-2} \mathbf{V} - p)}} \right]. \end{aligned}$$

From here, we use the conventional approximations  $E\left(\frac{A}{\sqrt{B}}\right) \approx E(A)E\left(\frac{1}{\sqrt{B}}\right) \approx \frac{E(A)}{\sqrt{E(B)}}$ . The precision of these approximations is inversely related to the variances of  $A$  and  $B$ . Since the variance in  $A$  and  $B$  declines as the sample size increases, these approximations will asymptotically become arbitrarily good. With these considerations in mind, we continue our derivation:

$$\begin{aligned}
E(\hat{r}) &\approx \frac{E(\boldsymbol{\beta}'\mathbf{S}_\beta^{-1}\mathbf{S}_\alpha^{-1}\boldsymbol{\alpha} + \mathbf{U}'\mathbf{S}_\beta^{-1}\mathbf{S}_\alpha^{-1}\boldsymbol{\alpha} + \boldsymbol{\beta}'\mathbf{S}_\beta^{-1}\mathbf{S}_\alpha^{-1}\mathbf{V} + \mathbf{U}'\mathbf{S}_\beta^{-1}\mathbf{S}_\alpha^{-1}\mathbf{V})}{\sqrt{E[(\boldsymbol{\beta}'\mathbf{S}_\beta^{-2}\boldsymbol{\beta} + 2\mathbf{U}'\mathbf{S}_\beta^{-2}\boldsymbol{\beta} + \mathbf{U}'\mathbf{S}_\beta^{-2}\mathbf{U} - p)(\boldsymbol{\alpha}'\mathbf{S}_\alpha^{-2}\boldsymbol{\alpha} + 2\mathbf{V}'\mathbf{S}_\alpha^{-2}\boldsymbol{\alpha} + \mathbf{V}'\mathbf{S}_\alpha^{-2}\mathbf{V} - p)]}} \\
&= \frac{\boldsymbol{\beta}'E(\mathbf{S}_\beta^{-1}\mathbf{S}_\alpha^{-1})\boldsymbol{\alpha} + E(\mathbf{U}')E(\mathbf{S}_\beta^{-1}\mathbf{S}_\alpha^{-1})\boldsymbol{\alpha} + \boldsymbol{\beta}'E(\mathbf{S}_\beta^{-1}\mathbf{S}_\alpha^{-1})E(\mathbf{V}) + E(\mathbf{U}')E(\mathbf{S}_\beta^{-1}\mathbf{S}_\alpha^{-1})E(\mathbf{V})}{\sqrt{(\boldsymbol{\beta}'E(\mathbf{S}_\beta^{-2})\boldsymbol{\beta} + 2E(\mathbf{U}')E(\mathbf{S}_\beta^{-2})\boldsymbol{\beta} + E(\mathbf{U}'\mathbf{S}_\beta^{-2}\mathbf{U}) - p)[\boldsymbol{\alpha}'E(\mathbf{S}_\alpha^{-2})\boldsymbol{\alpha} + 2E(\mathbf{V}')E(\mathbf{S}_\alpha^{-2})\boldsymbol{\alpha} + E(\mathbf{V}'\mathbf{S}_\alpha^{-2}\mathbf{V}) - p]}} \\
&= \frac{\boldsymbol{\beta}'E(\mathbf{S}_\beta^{-1}\mathbf{S}_\alpha^{-1})\boldsymbol{\alpha}}{\sqrt{[\boldsymbol{\beta}'E(\mathbf{S}_\beta^{-2})\boldsymbol{\beta} + E(\mathbf{U}'\mathbf{S}_\beta^{-2}\mathbf{U}) - p][\boldsymbol{\alpha}'E(\mathbf{S}_\alpha^{-2})\boldsymbol{\alpha} + E(\mathbf{V}'\mathbf{S}_\alpha^{-2}\mathbf{V}) - p]}}
\end{aligned}$$

The second line follows from the independence of  $\mathbf{U}$  and  $\mathbf{V}$ , and the third uses  $E(\mathbf{U}) = E(\mathbf{V}) = \mathbf{0}$ .

To complete this derivation, we must evaluate each of these expectations. By the properties of the random variables defined above, we have

$$\begin{aligned}
E(S_{\beta j}^{-1}S_{\alpha j}^{-1}) &= E\left(\sqrt{\frac{n_Y - 2}{\sigma_{\varepsilon Y}^2} \frac{W_{\beta j}}{K_{\beta j}}} \sqrt{\frac{n_Z - 2}{\sigma_{\varepsilon Z}^2} \frac{W_{\alpha j}}{K_{\alpha j}}}\right) \\
&= \sqrt{\frac{(n_Y - 2)(n_Z - 2)}{\sigma_{\varepsilon Y}^2 \sigma_{\varepsilon Z}^2}} E\left(\sqrt{W_{\beta j}}\right) E\left(\sqrt{\frac{1}{K_{\beta j}}}\right) E\left(\sqrt{W_{\alpha j}}\right) E\left(\sqrt{\frac{1}{K_{\alpha j}}}\right) \\
&= \sqrt{\frac{(n_Y - 2)(n_Z - 2)}{\sigma_{\varepsilon Y}^2 \sigma_{\varepsilon Z}^2}} \left(\frac{\Gamma\left(\frac{n_Y}{2} + \frac{1}{2}\right)}{\sqrt{2}\Gamma\left(\frac{n_Y}{2}\right)} \sqrt{D_{jj}}\right) \left(\frac{\Gamma\left(\frac{n_Y - 2}{2} - \frac{1}{2}\right)}{\sqrt{2}\Gamma\left(\frac{n_Y - 2}{2}\right)}\right) \left(\frac{\Gamma\left(\frac{n_Z}{2} + \frac{1}{2}\right)}{\sqrt{2}\Gamma\left(\frac{n_Z}{2}\right)} \sqrt{D_{jj}}\right) \left(\frac{\Gamma\left(\frac{n_Z - 2}{2} - \frac{1}{2}\right)}{\sqrt{2}\Gamma\left(\frac{n_Z - 2}{2}\right)}\right) \\
&= \sqrt{\frac{(n_Y - 2)(n_Z - 2)}{\sigma_{\varepsilon Y}^2 \sigma_{\varepsilon Z}^2}} \left(\frac{\Gamma\left(\frac{n_Y}{2} + \frac{1}{2}\right)}{\sqrt{2}\Gamma\left(\frac{n_Y}{2}\right)}\right) \left(\frac{\Gamma\left(\frac{n_Y - 2}{2} - \frac{1}{2}\right)}{\sqrt{2}\Gamma\left(\frac{n_Y - 2}{2}\right)}\right) \left(\frac{\Gamma\left(\frac{n_Z}{2} + \frac{1}{2}\right)}{\sqrt{2}\Gamma\left(\frac{n_Z}{2}\right)}\right) \left(\frac{\Gamma\left(\frac{n_Z - 2}{2} - \frac{1}{2}\right)}{\sqrt{2}\Gamma\left(\frac{n_Z - 2}{2}\right)}\right) D_{jj} \\
&\rightarrow \sqrt{\frac{(n_Y - 2)(n_Z - 2)}{\sigma_{\varepsilon Y}^2 \sigma_{\varepsilon Z}^2}} (\sqrt{n_Y}) \left(\sqrt{\frac{1}{n_Y - 2}}\right) (\sqrt{n_Z}) \left(\sqrt{\frac{1}{n_Z - 2}}\right) D_{jj} \\
&= \sqrt{\frac{n_Y n_Z}{\sigma_{\varepsilon Y}^2 \sigma_{\varepsilon Z}^2}} D_{jj}.
\end{aligned}$$

In these lines of algebra, the second equality follows from the independence of each of these random variables. The approximation uses  $\lim_{x \rightarrow \infty} \frac{\Gamma(x+\alpha)}{\Gamma(x)x^\alpha} = 1$ . This calculation implies that

$$E(S_{\beta j}^{-1}S_{\alpha j}^{-1}) \rightarrow \sqrt{\frac{n_Y n_Z}{\sigma_{\varepsilon Y}^2 \sigma_{\varepsilon Z}^2}} D_{jj}.$$

Also using independence, we have

$$\begin{aligned}
E(S_{\beta j}^{-2}) &= E\left(\frac{n_Y - 2}{\sigma_{\varepsilon Y}^2} \frac{W_{\beta j}}{K_{\beta j}}\right) \\
&= \frac{n_Y - 2}{\sigma_{\varepsilon Y}^2} E(W_{\beta j}) E\left(\frac{1}{K_{\beta j}}\right) \\
&= \frac{n_Y - 2}{\sigma_{\varepsilon Y}^2} (n_Y D_{jj}) \left(\frac{1}{n - 4}\right) \\
&= \frac{(n_Y - 2)n_Y}{(n_Y - 4)\sigma_{\varepsilon Y}^2} D_{jj} \\
&\rightarrow \frac{n_Y}{\sigma_{\varepsilon Y}^2} D_{jj}.
\end{aligned}$$

and

$$\begin{aligned}
E(S_{\alpha j}^{-2}) &= \frac{(n_Z - 2)n_Z}{(n_Z - 4)\sigma_{\varepsilon Z}^2} D_{jj} \\
&\rightarrow \frac{n_Z}{\sigma_{\varepsilon Z}^2} D_{jj},
\end{aligned}$$

which imply

$$\begin{aligned}
E(S_{\beta}^{-2}) &\rightarrow \left(\frac{n_Y}{\sigma_{\varepsilon Y}^2} D_g\right) \\
E(S_{\alpha}^{-2}) &\rightarrow \left(\frac{n_Z}{\sigma_{\varepsilon Z}^2} D_g\right).
\end{aligned}$$

Lastly,

$$\begin{aligned}
E(U_j^2 S_{\beta j}^{-2}) &= E(U_j^2) E(S_{\beta j}^{-2}) \\
&= \frac{\sigma_{\varepsilon Y}^2}{n_Y D_{jj}} \frac{(n_Y - 2)n_Y}{(n_Y - 4)\sigma_{\varepsilon Y}^2} D_{jj} \\
&= \frac{(n_Y - 2)}{(n_Y - 4)} \\
&\rightarrow 1,
\end{aligned}$$

and

$$\begin{aligned}
E(V_j^2 S_{\alpha j}^{-2}) &= \frac{(n_Z - 2)}{(n_Z - 4)} \\
&\rightarrow 1.
\end{aligned}$$

It follows from these last two asymptotic results that

$$E(\mathbf{U}' \mathbf{S}_{\beta}^{-2} \mathbf{U}) \approx E(\mathbf{V}' \mathbf{S}_{\alpha}^{-2} \mathbf{V}) \rightarrow p.$$

where (as a reminder)  $p$  is the number of SNPs in  $\boldsymbol{\beta}$  and  $\boldsymbol{\alpha}$ .

Substituting all of these asymptotic values from above,



$$\begin{aligned}
E(\hat{r}) &\approx \frac{\boldsymbol{\beta}' E(\mathbf{S}_\beta^{-1} \mathbf{S}_\alpha^{-1}) \boldsymbol{\alpha}}{\sqrt{[\boldsymbol{\beta}' E(\mathbf{S}_\beta^{-2}) \boldsymbol{\beta} + E(\mathbf{U}' \mathbf{S}_\beta^{-2} \mathbf{U}) - p][\boldsymbol{\alpha}' E(\mathbf{S}_\alpha^{-2}) \boldsymbol{\alpha} + E(\mathbf{V}' \mathbf{S}_\alpha^{-2} \mathbf{V}) - p]}} \\
&\approx \frac{\boldsymbol{\beta}' \left( \sqrt{\frac{n_Y n_Z}{\sigma_{\varepsilon Y}^2 \sigma_{\varepsilon Z}^2}} \mathbf{D}_g \right) \boldsymbol{\alpha}}{\sqrt{\left[ \boldsymbol{\beta}' \left( \frac{n_Y}{\sigma_{\varepsilon Y}^2} \mathbf{D}_g \right) \boldsymbol{\beta} + p - p \right] \left[ \boldsymbol{\alpha}' \left( \frac{n_Z}{\sigma_{\varepsilon Z}^2} \mathbf{D}_g \right) \boldsymbol{\alpha} + p - p \right]}} \\
&= \frac{\sqrt{\frac{n_Y n_Z}{\sigma_{\varepsilon Y}^2 \sigma_{\varepsilon Z}^2}} \boldsymbol{\beta}' \mathbf{D}_g \boldsymbol{\alpha}}{\sqrt{\frac{n_Y n_Z}{\sigma_{\varepsilon Y}^2 \sigma_{\varepsilon Z}^2} \boldsymbol{\beta}' \mathbf{D}_g \boldsymbol{\beta} \boldsymbol{\alpha}' \mathbf{D}_g \boldsymbol{\alpha}}} \\
&= \frac{\boldsymbol{\beta}' \mathbf{D}_g \boldsymbol{\alpha}}{\sqrt{\boldsymbol{\beta}' \mathbf{D}_g \boldsymbol{\beta} \boldsymbol{\alpha}' \mathbf{D}_g \boldsymbol{\alpha}}} \\
&= r.
\end{aligned}$$

Therefore, our estimator for  $r$  is, in fact, asymptotically unbiased.

Calculating analytic standard errors for this estimator is complicated because the functional form is nonlinear and because accounting for LD requires an estimate of the LD structure of the whole genome.

Since our approach requires that the GWAS meta-analyses have been conducted in independent samples for each of the two traits, for each MHBA phenotype, we re-run the meta-analysis for *EduYears* excluding any cohorts that were part of the meta-analysis of the respective MHBA phenotype. This procedure does not correct for potential sample overlap or relatedness of individuals between cohorts. Most published GWAS results are currently based on HapMap 2 imputation. Hence, our analyses include all HapMap 2 SNPs that are a subset of 1000 Genomes imputation (which is the imputation protocol used for our GWAS on *EduYears*).

### 3.2.2 Estimating Genetic Overlap Using LD Score Regression

The main estimates of genetic overlap between EA and MHBA phenotypes that we report in the main text are based on the LD Score method developed by Bulik-Sullivan et al. (2015)<sup>6</sup> and implemented in their LDSC python software package. This approach relies on an LD Score regression<sup>17</sup> and only requires GWAS summary statistics for all SNPs in the GWAS and a reference sample from which LD can be estimated. Formally, the method is based on the relationship:

$$E[z_{1j} z_{2j}] = \frac{\sqrt{N_1 N_2}}{M} \ell_j \rho_g + \text{Intercept},$$

where  $z_{kj}$  is the Z-statistic of SNP  $j$  from the GWAS of trait  $k$  ( $k = 1, 2$ ),  $N_k$  is the sample size of the GWAS of trait  $k$ ,  $\ell_j$  is the LD Score of SNP  $j$ ,  $M$  is the number of SNPs included in the GWAS,  $\rho_g$  is the genetic covariance between traits 1 and 2, and *Intercept* is the regression intercept. Finucane et al. (2015)<sup>18</sup> show that this relationship holds under a polygenic model.

LDSC runs the regression of  $\hat{z}_{1j}\hat{z}_{2j}$  on  $\sqrt{N_1N_2}\ell_j$  implied by this model and obtains an estimate of  $\rho_g$  from the estimated regression slope coefficient. It also runs separate LD Score regressions for traits 1 and 2 and estimates their heritability parameters  $h_{g1}^2$  and  $h_{g2}^2$  as the estimated regression slope coefficients. Finally, it uses all of these estimates to compute the genetic correlation as

$$\widehat{r}_{LD} = \frac{\widehat{\rho}_g}{\sqrt{\widehat{h}_{g1}^2 \widehat{h}_{g2}^2}}$$

As Bulik-Sullivan et al.<sup>6</sup> note, the genetic covariance and heritability estimates from LDSC will be biased if genomic control (GC) correction has been applied at any stage to the GWAS summary statistics. However, the biases cancel out in the calculation of  $\widehat{r}_{LD}$ , so as an estimator  $\widehat{r}_{LD}$  is not biased. (Below, we do not report estimates of heritability obtained with LDSC because they are biased.)

We use the “eur\_w\_ld\_chr/” files of LD Scores calculated by Finucane et al. (2015)<sup>18</sup> and made available on <https://github.com/bulik/ldsc/wiki/Genetic-Correlation>. These LD Scores were computed with genotypes from the European-ancestry samples in the 1000 Genomes Project using only HapMap3 SNPs. In our LD Score regressions, we include only HapMap3 SNPs with MAF > 0.01 to restrict the analyses to SNPs that are likely to be imputed with reasonable accuracy across all cohorts that contributed to the meta-analyses.

The standard errors are estimated (by the LDSC software) using a block jackknife over SNPs. As such, they should be interpreted as the variability of the estimate holding the sample constant but drawing a new set of SNPs. This is in contrast to the conventional interpretation of standard errors, which measure the variability of the estimate holding the covariates constant but drawing new sets of individuals. Ideally we would have standard errors that represent the latter, but it is unclear how one might obtain such estimates with the available data. For this reason, we report the block jackknife errors as in Bulik-Sullivan et al.<sup>6</sup>, but we note that they may be only loosely related to conventional standard errors.

### 3.2.3 Results

In Fig. 2 in the main text, we report the estimates of genetic overlap from the LD Score regression, along with 95% confidence intervals. In Supplementary Table 3.1, we report estimation results from both methods described above. Cognitive performance shows the strongest genetic overlap with *EduYears* ( $r = 0.82$  &  $r_{LD} = 0.75$ ). We also find substantial genetic overlap for mental health phenotypes, in particular for neuroticism (-0.37 & -0.41), Alzheimer’s disease (-0.20 & -0.31), and bipolar disorder (0.25 & 0.28). The positive genetic overlap between *EduYears* and bipolar disorder is noteworthy given that the phenotypic correlation is negative<sup>19,20</sup>.

Furthermore, we see substantial positive genetic overlap for intracranial volume (0.39 & 0.34) and height (0.16 & 0.13), as well as a strong negative overlap for BMI (-0.44 & -0.26).

Note that the two methods yield identical signs for all MHBA phenotypes, except those which have estimates close to zero (accumbens, hippocampus, pallidum). Furthermore, the

estimated coefficients from both methods are almost perfectly correlated ( $r = 0.97$ ). Note also that our results are consistent with those of Bulik-Sullivan et al.<sup>6</sup> for the phenotypes we study in common. (The phenotypes studied here, but not in Bulik-Sullivan et al.<sup>6</sup>, are cognitive performance, neuroticism, and the seven brain volume phenotypes.)

### 3.2.4 Comparing the Measures of Genetic Overlap

We will compare three measures of genetic overlap: (1)  $r$ , our new measure defined above; (2)  $r_{LD}$ , the measure derived from the LD Score regression; and (3) the correlation of the true polygenic scores for the corresponding traits (i.e., the polygenic scores that would be estimated in an infinite sample). These methods differ from one another in the way they deal with LD, although they are equivalent under some assumptions, as we show below.

For two traits  $y_i$  and  $z_i$ , we define  $\tilde{\mathbf{b}}$  and  $\tilde{\mathbf{a}}$  as the respective vectors of true SNP coefficients in a model that fits all of the SNPs at once. That is,

$$\begin{aligned} y_i &= \tilde{\mathbf{x}}_i \tilde{\mathbf{b}} + e_{y_i} \\ z_i &= \tilde{\mathbf{x}}_i \tilde{\mathbf{a}} + e_{z_i}, \end{aligned}$$

where  $\tilde{\mathbf{x}}_i$  is the standardized genotype vector of individual  $i$ , and  $e_{y_i}$  and  $e_{z_i}$  are the residuals of these models. Throughout, we use tildes over variables to denote standardized variables, the coefficients associated with standardized variables (note that these are different from standardized coefficients), and the variances and covariances associated with standardized variables. As before, we define  $\tilde{\mathbf{\Omega}}$  as the variance-covariance matrix of  $\tilde{\mathbf{x}}_i$ .

#### 3.2.4.1 The $r$ Measure of Genetic Overlap

Since our genotypes are standardized,  $r$  can be expressed as

$$r = \frac{\tilde{\mathbf{\beta}}' \tilde{\mathbf{\alpha}}}{\sqrt{\tilde{\mathbf{\beta}}' \tilde{\mathbf{\beta}} \tilde{\mathbf{\alpha}}' \tilde{\mathbf{\alpha}}}}$$

Applying the equation for the OLS estimator,  $\tilde{\mathbf{\beta}}$  and  $\tilde{\mathbf{b}}$  have the simple relationship

$$\begin{aligned} \tilde{\mathbf{\beta}} &= [\text{diag}(\tilde{\mathbf{\Omega}})]^{-1} \text{Cov}(\tilde{\mathbf{x}}_i, y_i) \\ &= \text{Cov}(\tilde{\mathbf{x}}_i, y_i) \\ &= \tilde{\mathbf{\Omega}} \tilde{\mathbf{\Omega}}^{-1} \text{Cov}(\tilde{\mathbf{x}}_i, y_i) \\ &= \tilde{\mathbf{\Omega}} \tilde{\mathbf{b}}. \end{aligned}$$

Similarly,

$$\tilde{\mathbf{\alpha}} = \tilde{\mathbf{\Omega}} \tilde{\mathbf{a}}.$$

Using these substitutions, we have

$$r = \frac{\tilde{\mathbf{b}}' \tilde{\Omega}^2 \tilde{\alpha}}{\sqrt{\tilde{\mathbf{b}}' \tilde{\Omega}^2 \tilde{\mathbf{b}} \tilde{\alpha}' \tilde{\Omega}^2 \tilde{\alpha}}}$$

### 3.2.4.2 The $r_{LD}$ Measure of Genetic Overlap

Under the assumption that the effect sizes  $\tilde{a}_j$ ,  $\tilde{b}_j$  are random and independent from each other and from the allele frequency and LD structure of their corresponding SNP—assumptions maintained by Bulik-Sullivan et al.<sup>6</sup> throughout their derivations—it can be shown that  $r_{LD}$  can be expressed as

$$\begin{aligned} r_{LD} &= \frac{\text{Cov}(\tilde{b}_j, \tilde{a}_j)}{\sqrt{\text{Var}(\tilde{b}_j) \text{Var}(\tilde{a}_j)}} \\ &= \frac{\tilde{\mathbf{b}}' \tilde{\alpha}}{\sqrt{\tilde{\mathbf{b}}' \tilde{\mathbf{b}} \tilde{\alpha}' \tilde{\alpha}}} \end{aligned}$$

This equation can be rewritten as

$$r_{LD} = \frac{\tilde{\mathbf{b}}' \tilde{\Omega}^0 \tilde{\alpha}}{\sqrt{\tilde{\mathbf{b}}' \tilde{\Omega}^0 \tilde{\mathbf{b}} \tilde{\alpha}' \tilde{\Omega}^0 \tilde{\alpha}}}$$

where  $\tilde{\Omega}^0$  is the identity matrix.

### 3.2.4.3 The Correlation Between True Polygenic Scores

Lastly, we note that the correlation of true polygenic scores is

$$\begin{aligned} r_{PG} &= \frac{\text{Cov}(\tilde{\mathbf{x}}_i \tilde{\mathbf{b}}, \tilde{\mathbf{x}}_i \tilde{\alpha})}{\sqrt{\text{Var}(\tilde{\mathbf{x}}_i \tilde{\mathbf{b}}) \text{Var}(\tilde{\mathbf{x}}_i \tilde{\alpha})}} \\ &= \frac{\tilde{\mathbf{b}}' \text{Var}(\tilde{\mathbf{x}}_i) \tilde{\alpha}}{\sqrt{\tilde{\mathbf{b}}' \text{Var}(\tilde{\mathbf{x}}_i) \tilde{\mathbf{b}} \tilde{\alpha}' \text{Var}(\tilde{\mathbf{x}}_i) \tilde{\alpha}}} \\ &= \frac{\tilde{\mathbf{b}}' \tilde{\Omega} \tilde{\alpha}}{\sqrt{\tilde{\mathbf{b}}' \tilde{\Omega} \tilde{\mathbf{b}} \tilde{\alpha}' \tilde{\Omega} \tilde{\alpha}}} \end{aligned}$$

or equivalently,

$$r_{PG} = \frac{\tilde{\mathbf{b}}' \tilde{\Omega}^1 \tilde{\alpha}}{\sqrt{\tilde{\mathbf{b}}' \tilde{\Omega}^1 \tilde{\mathbf{b}} \tilde{\alpha}' \tilde{\Omega}^1 \tilde{\alpha}}}$$

### 3.2.4.4 The Equivalence of $r$ , $r_{LD}$ and $r_{PG}$ under some Strong Assumptions

Each of these measures may be thought of as members of a class of measures of genetic overlap:

$$r(k) = \frac{\tilde{\mathbf{b}}' \tilde{\Omega}^k \tilde{\alpha}}{\sqrt{\tilde{\mathbf{b}}' \tilde{\Omega}^k \tilde{\mathbf{b}} \tilde{\alpha}' \tilde{\Omega}^k \tilde{\alpha}}}$$

with  $r_{LD} = r(0)$ ,  $r_{PG} = r(1)$ , and  $r = r(2)$ .

The parameter  $r(k)$  may be thought of as a measure of genetic overlap because it has the properties that: (i) if  $\tilde{\mathbf{b}}$  and  $\tilde{\alpha}$  are independent, then  $r(k) = 0$ ; and (ii) if  $\tilde{\mathbf{b}} = \tilde{\alpha}$ , then  $r(k) = 1$ . The relative behavior of  $r(k)$  for various values of  $k$  in intermediate cases will depend on the degree of LD in the data and how  $\tilde{\mathbf{b}}$  and  $\tilde{\alpha}$  are related to the LD.

#### *The Equivalence of $r_{LD}$ and $r_{PG}$ under some Strong Assumptions*

Bulik-Sullivan et al.<sup>6</sup> note that, under the assumption that the effect sizes  $\tilde{a}_j$ ,  $\tilde{a}_l$  are random, independent from each other for all  $j \neq l$ , and independent from the allele frequency and LD structure of their corresponding SNP,  $r_{LD} = r_{PG}$ . To see this, letting  $j$  and  $l$  index SNPs, observe that

$$\begin{aligned} E[\tilde{\mathbf{b}}' \tilde{\Omega}^1 \tilde{\alpha}] &= E \left[ \sum_{j,l} \tilde{b}_j \tilde{\Omega}_{jl} \tilde{a}_l \right] \\ &= \sum_{j,l} E[\tilde{b}_j \tilde{a}_l] E[\tilde{x}_j \tilde{x}_l] \\ &= \sum_j E[\tilde{b}_j \tilde{a}_j] E[\tilde{x}_j \tilde{x}_j] \\ &= \sum_j E[\tilde{b}_j \tilde{a}_j] \\ &= E[\tilde{\mathbf{b}}' \tilde{\Omega}^0 \tilde{\alpha}]. \end{aligned}$$

#### *The Equivalence of all Measures of Genetic Overlap in the $r(k)$ Class (Including $r$ , $r_{LD}$ and $r_{PG}$ ) under some Strong Assumptions*

One can generalize this proof: under these same strong assumption, all measures of genetic overlap in the  $r(k)$  class defined above are equivalent, i.e.,  $r(k) = r(l)$  for all integers  $k$  and  $l$ . As a corollary,  $r = r_{LD} = r_{PG}$ .

To see this, let  $\tilde{\Omega}_{ij}^k$  denote the  $(i, j)$ -th element of  $\tilde{\Omega}^k$  and observe that

$$\begin{aligned}
E[r(k)] &= E \left[ \frac{\tilde{\mathbf{b}}' \tilde{\Omega}^k \tilde{\mathbf{a}}}{\sqrt{\tilde{\mathbf{b}}' \tilde{\Omega}^k \tilde{\mathbf{b}} \tilde{\mathbf{a}}' \tilde{\Omega}^k \tilde{\mathbf{a}}}} \right] \\
&= E \left[ \frac{\sum_{ij} \tilde{b}_i \tilde{a}_j \tilde{\Omega}_{ij}^k}{\sqrt{(\sum_{ij} \tilde{b}_i \tilde{b}_j \tilde{\Omega}_{ij}^k) (\sum_{ij} \tilde{a}_i \tilde{a}_j \tilde{\Omega}_{ij}^k)}} \right] \\
&\approx \frac{\sum_i E[\tilde{b}_i \tilde{a}_i] \tilde{\Omega}_{ii}^k}{\sqrt{(\sum_i E[\tilde{b}_i^2] \tilde{\Omega}_{ii}^k) (\sum_i E[\tilde{a}_i^2] \tilde{\Omega}_{ii}^k)}} \\
&= \frac{E[\tilde{b}_i \tilde{a}_i] \sum_i \tilde{\Omega}_{ii}^k}{\sqrt{(E[\tilde{b}_i^2] \sum_i \tilde{\Omega}_{ii}^k) (E[\tilde{a}_i^2] \sum_i \tilde{\Omega}_{ii}^k)}} \\
&= \frac{E[\tilde{b}_i \tilde{a}_i] \sum_i \tilde{\Omega}_{ii}^k}{\sum_i \tilde{\Omega}_{ii}^k \sqrt{E[\tilde{b}_i^2] E[\tilde{a}_i^2]}} \\
&= \frac{E[\tilde{b}_i \tilde{a}_i]}{\sqrt{E[\tilde{b}_i^2] E[\tilde{a}_i^2]}}
\end{aligned}$$

where the approximation on the third line follows from the Law of Large Numbers, from the fact that there are many SNPs over which the summations are taken, and from the assumption that the elements of  $\mathbf{b}$  and  $\mathbf{a}$  are all independent except for pairs  $(b_j, a_j)$  corresponding to the same SNP  $j$ ; and where the equality on the fourth line follows from the assumption that the effect sizes are independent of the LD structure.

### 3.2.5 Discussion

It is natural to ask which of the measures discussed above is “best.” The answer depends on what one wishes to do. For instance,  $r$  measures the degree to which SNPs with the largest GWAS estimates for one trait will also be among the largest GWAS estimates for some other trait. Thus, it may be most relevant for the look-up exercises we perform in Supplementary Information section 3.3. Note that  $r$  will tend to be larger to the extent that the causal SNPs for the two traits are in LD with many of the same SNPs.

The parameter  $r_{PG}$  measures the degree to which a person with a high genetic propensity for one trait will have a high genetic propensity for another trait. This means that it may be relevant for understanding how well a polygenic score (estimated in a finite sample) for one trait may act as a proxy for the other. As with  $r$ , LD can influence the magnitude of  $r_{PG}$ . To the extent that the causal SNPs for the two traits are in LD with each other, the true polygenic scores will be correlated, which will increase  $r_{PG}$ .

Finally, the parameter  $r_{LD}$  measures the degree to which a SNP that has a large causal effect on one trait (conditioning on all other SNPs) will also have a relatively large causal effect on the other trait. Unlike the other two measures,  $r_{LD}$  is invariant to LD in that if two traits share no common causal variants,  $r_{LD}$  will be equal to zero (even if the causal variants are in strong

LD). This is easily seen in that  $r_{LD}$  is not a function of  $\Omega$  or of any variables that are correlated with  $\Omega$ .

### 3.3 Enrichment Analysis and Look-up of Lead SNPs in GWAS for Other Phenotypes

#### 3.3.1 Test for Joint Enrichment of the 74 Lead SNPs for the MHBA Phenotypes

For each of the 14 MHBA phenotypes (sources are listed in Supplementary Table 3.1), we compared the observed enrichment of our 74 lead SNPs to the expected degree of enrichment from 74 randomly chosen SNPs with similar allele frequencies.

Because the GWAS results files for some of the phenotypes do not include all 74 lead SNPs, we began by generating a set of candidate proxies for each of the lead SNPs. We used the clumping procedure described in Supplementary Information section 1.6.1 to identify all SNPs in the lead SNP's clump. We then retained from each clump the 25 SNPs whose LD with the lead SNP was greatest. This procedure yielded us a list of at most 25 candidate proxies for each lead SNP.

The following procedure was then used to implement the test:

1. For each phenotype, we generated a list of lead/proxy SNPs. If a lead SNP was directly available in the phenotype's results file, it was used. If not, we replaced it with the highest-LD candidate proxy available in the phenotype's results file. If none of the candidate proxies was available in the results file, no proxy was used for that lead SNP for that phenotype. Because we have 14 phenotypes and 74 lead SNPs, we looked up a total of  $14 \times 74 = 1,036$  SNPs in the results files. The lead SNP itself was available 783 times, a proxy was available 237 times (mean  $r^2$  with lead SNP is 0.90), and only in 16 cases we identified neither the lead SNP nor a candidate proxy (at most 4 cases for a given phenotype).
2. For each phenotype in turn, we used the software SNPsnap<sup>21</sup> to generate 10,000 matched SNP vectors with allele frequency distributions similar to that of the vector of lead/proxy SNPs. Specifically, the SNPs in each matching vector were drawn randomly conditional on having a minor allele frequency that deviated from the MAF of the lead/proxy SNP by at most one percentage point. We dropped a small number of lead/proxy SNPs that were not available in the SNPsnap database (for a given phenotype, the number of SNPs not recognized by SNPsnap never exceeded 4).
3. For each phenotype, the SNPsnap output is a matrix whose rows correspond to the available proxy/lead SNPs and each of whose 10,000 columns contains a vector of matched SNPs. We eliminated from the matrix any SNPs that were not available in the phenotype's results file, iteratively replacing cells containing non-available SNPs with a missing value and shifting the row vector leftward to fill in missing values. Then, we kept only the first 500 column vectors of the matrix. By construction, this matrix only contained SNPs available in the phenotype's result file.
4. For each phenotype, our test statistic is the mean squared Z-statistic of the lead/proxy SNPs. The observed test statistic was calculated excluding SNPs for which (i) the lead SNP and its candidate proxies were all unavailable in the phenotype's results file, or

(ii) the lead/proxy SNP was not recognized by SNPsnap. To generate an empirical null distribution, we calculated the test statistic (the mean squared Z-statistic of the SNPs) in each of the 500 vectors from step (3). We then calculated the empirical  $P$ -value as the percentile of the null distribution at which the observed test statistic falls.

### 3.3.2 SNP Look-up and Proxy-Phenotype Analysis

We have just described how the lead SNPs (or the best available proxies) were tested jointly for association with each of the 14 MHBA phenotypes. Here, we test the same SNPs individually for association with the same 14 phenotypes.

For each phenotype, we looked up the  $P$ -value of each lead/proxy SNPs (whose construction was described in the previous subsection). The results from this analysis are shown in Supplementary Table 3.2. We consider two  $P$ -value thresholds. The first threshold corrects for both the number of lead SNPs (74) as well as the number of MHBA phenotypes (14): this  $P$ -value threshold is  $0.05 / (74 \times 14) = 4.83 \times 10^{-5}$ . (For simplicity, we corrected for 74 SNPs here and below even for phenotypes for which we tested fewer than 74 SNPs due to missing lead/proxy SNPs in the phenotype's result file.) The SNPs whose  $P$ -values satisfy this stricter threshold are color-coded in green in Supplementary Table 3.2, so we refer to them as “green SNPs” in what follows. Our second threshold corrects only for the number of SNPs:  $0.05 / 74 = 6.76 \times 10^{-4}$ . SNPs reaching this threshold (but not the stricter threshold) are color-coded in yellow and referred to as “yellow SNPs.”

For each yellow SNP, we investigated whether it is in a genomic region harboring SNPs previously reported to reach genome-wide significance in that phenotype's GWAS. To this end, we identified the set of LD partners of each yellow SNP, defined as SNPs within 1000kb whose pairwise LD with the yellow SNP exceeds a  $r^2$  of 0.1. We estimated the pairwise  $r^2$  using the European-ancestry 1000 Genomes Project phase 1 genotyping data<sup>22</sup>. We then examined whether the lead/proxy SNP or any of its LD partners reached genome-wide significance in the phenotype's GWAS. If none did, we classified the SNP as “prioritized.” We followed the same procedure with the green SNPs. Using this procedure, we found that 10 of the 25 SNPs labeled as either green or yellow are prioritized. Of the 15 green SNPs, we found that 3 are prioritized (one for hippocampus and two for height; see Supplementary Tables 3.2, 3.3, and 3.4).

A concern about these results is that the *EduYears* and MHBA phenotype samples are not independent. Sample overlap biases the look-up exercise toward finding a significant effect on the MHBA phenotype because of the phenotypic correlations between each of the MHBA phenotypes and *EduYears*. To test the robustness of our findings to this concern, we ran restricted *EduYears* meta-analyses dropping overlapping cohorts. The color gray in Supplementary Table 3.2 flags lead SNPs that no longer reach genome-wide significance in the meta-analysis of *EduYears* after we excluded cohorts that overlap with the cohorts included in the phenotype's GWAS. Of the 10 prioritized SNPs, 4 reached genome-wide significance even in the restricted GWAS without sample overlap (one for each of height, hippocampus, ICV, and schizophrenia).



### 3.3.3 Results

Extended Data Fig. 5 shows the Q-Q plots of the lead/proxy SNPs for the MHBA phenotypes (as defined in Supplementary Information section 3.1).

The test for joint enrichment of the SNPs (Supplementary Information section 3.3.1) yields significant  $P$ -values at the 0.05 level for the following phenotypes: Alzheimer's ( $P = 0.026$ ), bipolar ( $P < 0.002$ ), BMI ( $P = 0.004$ ), cognitive performance ( $P < 0.002$ ), height ( $P = 0.006$ ), hippocampus ( $P = 0.008$ ), intracranial volume ( $P = 0.006$ ), neuroticism ( $P < 0.002$ ), and schizophrenia ( $P < 0.002$ ). We found no significant enrichment for accumbens, caudate, pallidum, putamen, and thalamus. Note, however, that our statistical power to detect associations is a function of the sample size of the MHBA phenotype meta-analyses and of the reliability of phenotypic measurement. Only relatively modest sample sizes were available for the brain anatomy phenotypes<sup>14</sup> ( $N < 13,000$  for subcortical regions), and measurement of subcortical volumes is notoriously prone to measurement error.

We identified which of the significant associations with MHBA phenotypes are prioritized, as described in Supplementary Information section 3.3.2. One of the two SNPs that passes Bonferroni correction for cognitive performance in our look-up (rs9320913 on chr 6) is in high LD with rs1487441, which was previously reported by Rietveld et al. (2014)<sup>12</sup> ( $r^2 = 0.905$  according to the 1000 Genomes Pilot 1 reference panel)<sup>23</sup>, and therefore we do not consider it to be a prioritized association.<sup>o</sup> In addition, one EA lead SNP that passes Bonferroni correction for intracranial volume (rs192818565) tags the only previously identified locus<sup>14,24</sup>, and thus we also do not consider this finding to be a prioritized association. Supplementary Table 3.3 summarizes the main findings of our look-up exercise.

We identify prioritized SNP associations for: Alzheimer's disease (rs7945718), BMI (rs56231335), cognitive performance (rs12682297), height (rs10496091, rs113520408, rs9537821), hippocampus (rs4500960), intracranial volume (rs12969294), neuroticism (rs12969294), and schizophrenia (rs11588857). Extended Data Fig. 6 shows examples of regional association plots of the prioritized SNPs for cognitive performance, hippocampus, intracranial volume, and neuroticism. We picked these four examples because very few genome-wide significant SNPs have been reported for these traits until now. Regional association plots for the remaining prioritized SNPs are available on <http://ssgac.org/Data.php>.

Several of our EA lead SNPs are related to more than one MHBA phenotype. For example, rs12969294 is a prioritized SNP for both intracranial volume and neuroticism, rs4500960 is prioritized for hippocampus volume and was previously identified as being associated with schizophrenia, and rs7945718 is prioritized for Alzheimer's here and was identified earlier as a height SNP.

---

<sup>o</sup> Rietveld et al. (2014)<sup>12</sup> reported several SNP associations with cognitive performance using a similar approach as we use here (with educational attainment as a "proxy phenotype"). However, they used a different set of education-associated SNPs (based on Rietveld et al. 2013<sup>80</sup> and a  $P$ -value threshold of  $10^{-5}$  instead of the  $5 \times 10^{-8}$  threshold used here). The three SNPs that survived Bonferroni correction in their analysis have the following  $P$ -values in our current meta-analysis of *EduYears*, after we exclude the second-stage cohorts used in Rietveld et al. (2014): rs1487441 on chr 6 ( $P = 1.1 \times 10^{-16}$ ), rs7923609 on chr 10 ( $P = 8.13 \times 10^{-6}$ ), and rs2721173 on chr 8 ( $P = 3.22 \times 10^{-7}$ ).

Consistent with our finding sign concordance with *EduYears* less than 50%, we find negative correlation of SNP coefficients with *EduYears* for Alzheimer's, BMI, and neuroticism. Consistent with their sign concordance greater than 50%, we find positive correlation of SNP coefficients for cognitive performance, intracranial volume, and height (although for height, the sign concordance is not statistically distinguishable from 50%). An intriguing pattern is found for schizophrenia, which has a positive but near-zero estimated genetic correlation ( $r_{LD} = 0.08$  with  $P = 3.2 \times 10^{-4}$ ) and a nearly equal percentage of concordant SNPs and discordant SNPs among the set of 74 that we tested (51% concordant)—and yet, as reported above, the enrichment of association of these SNPs for schizophrenia is strong ( $P < 0.002$ ). We now turn to potential explanations for this result and discuss related literature.

### 3.3.4 Discussion

Our work builds on earlier epidemiological research using genetically informative designs<sup>3-5,25-29</sup>.

First, our results corroborate earlier findings that the genetic contribution to the positive relationship between cognitive performance and EA is substantial, but not perfect<sup>1,30,31</sup>.

Second, earlier studies found that neuroticism is a powerful negative predictor of achievement across various domains including job performance, academic achievement, and performance on tests of cognitive performance, partly through test anxiety<sup>32-36</sup>. The strong negative genetic overlap between EA and neuroticism suggests that SNPs associated with EA may be good candidates for association with neuroticism.

Third, our finding of a negative genetic correlation between EA and BMI corroborates earlier evidence from twin studies suggesting that the negative relationship between EA and BMI<sup>37-41</sup> is partially due to common genetic factors<sup>2,25,42</sup>. A possible hypothesis to explain this finding is that the genetic effects on BMI may be partially mediated by individual differences in self-control, impulsivity, and reward sensitivity<sup>43-48</sup>, which are also linked to learning and academic achievement<sup>45-48</sup>. Interestingly, the most recent GWAS on BMI found that genes associated with BMI are much more strongly expressed in the nervous system and sense organs than in the digestive system<sup>15</sup>. However, future research is needed to better understand the mechanisms underlying these findings.

Fourth, our results also relate to a literature on the relationship between cognitive performance and brain size. A recent meta-analysis of published and unpublished studies on this topic identified 88 articles involving overall more than 8,000 individuals<sup>49</sup>. The meta-analysis reported a significant positive association ( $r = 0.24$ ) but concluded that this estimate is too high due to publication bias. Furthermore, twin studies have found that the association between brain volume and cognitive performance is partly due to common genetic effects<sup>4,26</sup>. Although we report results on intracranial instead of brain volume<sup>p</sup> and overlap with EA rather than cognitive performance, the strong positive genetic overlap of EA with both cognitive performance and intracranial volume corroborates the earlier twin-study findings that their moderate positive phenotypic association is partly due to a shared genetic component.

---

<sup>p</sup> Brain volume and intracranial volume are highly positively correlated, but in contrast to brain volume, intracranial volume remains roughly constant during adult life<sup>95</sup>.

Fifth, our results relate to ongoing research on schizophrenia and bipolar disorder. Earlier work has demonstrated links between these mental disorders on the one hand, and school performance, cognitive performance, creativity, and educational attainment on the other. Although these latter measures are related to each other and share a genetic basis, the phenotypic and genetic correlations between them are far from perfect<sup>30,50,51</sup>. Furthermore, their relationship with schizophrenia and bipolar disorder is rather complex and possibly U-shaped.

On the one hand, low cognitive performance and low school performance have been reported as risk factors for schizophrenia and bipolar disorder<sup>19,52-55</sup>. For example, evidence from a large, population-based Swedish Multi-Generation Register suggests a weak negative correlation (-0.11) between IQ and psychosis (a term referring to mental disorders including both schizophrenia and bipolar disorder)<sup>5</sup>. Furthermore, Stefansson et al. (2013)<sup>28</sup> demonstrate that rare copy-number variants that are known to cause schizophrenia also predict lower cognitive performance in healthy individuals.

On the other hand, a higher prevalence of psychosis among individuals high in cognitive performance and creativity has been frequently reported<sup>56-58</sup>, and polygenic risk scores for bipolar disorder and schizophrenia have been reported to predict creativity in independent samples<sup>29</sup>. This suggests that some genetic variants that increase the risk for psychosis may also have positive effects on cognitive performance.

The relationship between educational attainment and schizophrenia specifically is similarly complex. Although early-onset schizophrenia is associated with school dropout<sup>59</sup>, Kremen et al. (2006)<sup>60</sup> find no clear relationship between educational attainment and risk of schizophrenia. More generally, the relationship between education and schizophrenia appears to depend on age at onset, duration, and severity of the disease, factors that often are not measured<sup>61</sup>. The failure to account for these factors in many empirical studies may contribute to the relatively weak or even seemingly contradictory results.

As suggested by Craddock et al. (2009)<sup>62</sup>, it is possible that the clinical diagnoses of schizophrenia and bipolar disorder mask several disease subtypes that are caused by different biological mechanisms. This is one possible interpretation of our results for schizophrenia: The strong enrichment for association of our EA lead SNPs with schizophrenia, combined with a nearly equal percentage of concordant and discordant associations of our lead SNPs with these mental disorders, could point to different sub-types of schizophrenia that are lumped together by the current disease classification system. Alternatively, it may be that SNPs that are associated with schizophrenia happen to be in LD with SNPs that are associated with educational attainment simply because both sets of SNPs are primarily located in genes or genomic regions that are expressed in the brain. Such co-localization would generate a haphazard pattern of sign concordance. Follow-up research will need to differentiate between these different interpretations of our results.

Sixth, our results relate to ongoing research in cognitive neuroscience that aims to identify how specific cognitive processes are mapped to neural substrates and brain structures. Visuomotor abilities<sup>63</sup>, visuospatial<sup>64</sup> and verbal-working memory<sup>65</sup>, executive functions<sup>66</sup>, motivation and reward processing<sup>67,68</sup>, and social skills<sup>69</sup> have all been linked to EA. Thus, brain structures that influence performance of these cognitive functions could be related to EA. Viewed from that perspective, it might be surprising that our 95% confidence intervals rule out even a moderately sized genetic correlation between EA and the volumes of the six

sub-cortical structures we tested. However, our results do not exclude the possibilities that (a) a significant *phenotypic* relationship between EA and anatomical features of these sub-cortical regions may exist; (b) with greater statistical power, we could statistically distinguish from zero the magnitude of genetic correlation with these sub-cortical volumes (especially given the relatively low statistical power as discussed in Supplementary Information section 3.3.3); (c) SNPs associated with EA may still be enriched for association with the sub-cortical volumes investigated here, as we indeed found for hippocampus; and (d) substantial genetic correlations may exist between EA and other brain structures that are not investigated here (e.g., cortical volume, fronto-parietal network, and white matter).

Finally, our look-up results confirmed that EA is a useful “proxy phenotype”<sup>12</sup> to study the genetic architecture of brain volume phenotypes. This is particularly noteworthy because only very few SNPs associated with brain volume phenotypes have been discovered. Specifically, the largest GWAS meta-analysis on brain volume phenotypes to date<sup>14</sup> reports two genome-wide significant SNPs for hippocampus and only one for intracranial volume. Our results prioritized additional SNPs for hippocampus (rs4500960 on chr 2, with a discordant sign of the effect) and intracranial volume (rs12969294 on chr 18, concordant sign). Furthermore, an additional EA lead SNP that passes Bonferroni correction (rs192818565) tags the only previously identified locus for intracranial volume<sup>14,24</sup>.

For neuroticism, the largest GWAS meta-analysis to date<sup>13</sup> reports one genome-wide-significant SNP. Our look-up exercise prioritizes a second SNP, rs12969294 on chr 18 (discordant sign).

We find various interesting patterns that warrant future investigation. Several SNPs that are associated with an *increased* chance to obtain higher education are also associated with an *increased* likelihood of bipolar disorder or schizophrenia. For schizophrenia, several of these SNPs that have sign-concordant effects with EA survive Bonferroni correction (rs11588857, rs2245901, rs2992632, rs6739979, rs7306755), and one of them has not previously been identified yet as a schizophrenia variant (rs11588857). Furthermore, one of the three prioritized height SNPs we identify has sign-discordant effects on height and EA (rs113520408).

## References

1. Calvin, C. *et al.* Multivariate genetic analyses of cognition and academic achievement from two population samples of 174,000 and 166,000 school children. *Behav. Genet.* **42**, 699–710 (2012).
2. Della Bella, S. & Lucchini, M. Education and BMI: a genetic informed analysis. *Qual. Quant.* (2014).
3. Silventoinen, K., Krueger, R. F., Bouchard, T. J., Kaprio, J. & McGue, M. Heritability of body height and educational attainment in an international context: comparison of adult twins in Minnesota and Finland. *Am. J. Hum. Biol.* **16**, 544–555 (2004).
4. Posthuma, D. *et al.* The association between brain volume and intelligence is of genetic origin. *Nat. Neurosci.* **5**, 83–84 (2002).

5. Fowler, T., Zammit, S., Owen, M. J. & Rasmussen, F. A population-based study of shared genetic variation between premorbid IQ and psychosis among male twin pairs and sibling pairs from Sweden. *Arch. Gen. Psychiatry* **69**, 460–466 (2012).
6. Bulik-Sullivan, B. *et al.* An atlas of genetic correlations across human diseases and traits. *Nat. Genet.* **47**, 1236–1241 (2015).
7. Lee, S. H., Yang, J., Goddard, M. E., Visscher, P. M. & Wray, N. R. Estimation of pleiotropy between complex diseases using single-nucleotide polymorphism-derived genomic relationships and restricted maximum likelihood. *Bioinformatics* **28**, 2540–2542 (2012).
8. Lambert, J. C. *et al.* Meta-analysis of 74,046 individuals identifies 11 new susceptibility loci for Alzheimer’s disease. *Nat. Genet.* **45**, 1452–1458 (2013).
9. Psychiatric GWAS Consortium Bipolar Disorder Working Group. Large-scale genome-wide association analysis of bipolar disorder identifies a new susceptibility locus near ODZ4. *Nat. Genet.* **43**, 977–983 (2011).
10. Ripke, S. *et al.* Biological insights from 108 schizophrenia-associated genetic loci. *Nature* **511**, 421–427 (2014).
11. Benyamin, B. *et al.* Childhood intelligence is heritable, highly polygenic and associated with FBNP1L. *Mol. Psychiatry* **19**, 1–6 (2013).
12. Rietveld, C. A. *et al.* Common genetic variants associated with cognitive performance identified using the proxy-phenotype method. *Proc. Natl. Acad. Sci. USA* **111**, 13790–13794 (2014).
13. De Moor, V. D. B. *et al.* Genome-wide association study identifies novel locus for neuroticism and shows polygenic association with Major Depressive Disorder. *JAMA Psychiatry* **72**, 642–650 (2015).
14. Hibar, D. P. *et al.* Common genetic variants influence human subcortical brain structures. *Nature* **520**, 224–229 (2015).
15. Locke, A. E. *et al.* Genetic studies of body mass index yield new insights for obesity biology. *Nature* **518**, 197–206 (2015).
16. Wood, A. R. *et al.* Defining the role of common variation in the genomic and biological architecture of adult human height. *Nat. Genet.* **46**, 1173–1186 (2014).
17. Bulik-Sullivan, B. K. *et al.* LD Score regression distinguishes confounding from polygenicity in genome-wide association studies. *Nat. Genet.* **47**, 291–295 (2015).
18. Finucane, H. K. *et al.* Partitioning heritability by functional category using GWAS summary statistics. *Nat. Genet.* **47**, 1228–1235.
19. Glahn, D. C., Bearden, C. E., Bowden, C. L. & Soares, J. C. Reduced educational attainment in bipolar disorder. *J. Affect. Disord.* **92**, 309–312 (2006).

20. Robinson, L. J. *et al.* A meta-analysis of cognitive deficits in euthymic patients with bipolar disorder. *J. Affect. Disord.* **93**, 105–115 (2006).
21. Pers, T. H., Timshel, P. & Hirschhorn, J. N. SNPsnip: a Web-based tool for identification and annotation of matched SNPs. *Bioinformatics* **31**, 418–20 (2015).
22. Abecasis, G. R. *et al.* An integrated map of genetic variation from 1,092 human genomes. *Nature* **491**, 56–65 (2012).
23. Institute, B. SNAP - SNP annotation and proxy search. at <<https://www.broadinstitute.org/mpg/snap/ldsearchpw.php>> (2015)
24. Ikram, M. A. *et al.* Common variants at 6q22 and 17q21 are associated with intracranial volume. *Nat. Genet.* **44**, 539–544 (2012).
25. Silventoinen, K., Sarlio-Lahteenkorva, S., Koskenvuo, M., Lahelma, E. & Kaprio, J. Effect of environmental and genetic factors on education-associated disparities in weight and weight gain: a study of Finnish adult twins. *Am J Clin Nutr* **80**, 815–822 (2004).
26. Posthuma, D. *et al.* Genetic correlations between brain volumes and the WAIS-III dimensions of verbal comprehension, working memory, perceptual organization, and processing speed. *Twin Res.* **6**, 131–139 (2012).
27. Lencz, T. *et al.* Molecular genetic evidence for overlap between general cognitive ability and risk for schizophrenia: a report from the Cognitive Genomics consorTium (COGENT). *Mol. Psychiatry* **19**, 168–174 (2014).
28. Stefansson, H. *et al.* CNVs conferring risk of autism or schizophrenia affect cognition in controls. *Nature* **505**, 361–366 (2013).
29. Power, R. A. *et al.* Polygenic risk scores for schizophrenia and bipolar disorder predict creativity. *Nat. Neurosci.* **18**, 953–955 (2015).
30. Thompson, L. A., Detterman, D. K. & Plomin, R. Associations between cognitive abilities and scholastic achievement: Genetic overlap but environmental differences. *Psychol. Sci.* **2**, 158–165 (1991).
31. Greven, C. U., Harlaar, N., Kovas, Y., Chamorro-Premuzic, T. & Plomin, R. More than just IQ: school achievement is predicted by self-perceived abilities-but for genetic rather than environmental reasons. *Psychol. Sci.* **20**, 753–762 (2009).
32. Lynn, R. & Gordon, I. E. The relation of neuroticism and extraversion to intelligence and educational attainment. *Br. J. Educ. Psychol.* **31**, 194–203 (1961).
33. McKenzie, J., Taghavi-Khonsary, M. & Tindell, G. Neuroticism and academic achievement: the Furneaux Factor as a measure of academic rigour. *Pers. Individ. Dif.* **29**, 3–11 (2000).

34. Gallagher, D. J. Personality, coping, and objective outcomes: extraversion, neuroticism, coping styles, and academic performance. *Pers. Individ. Dif.* **21**, 421–429 (1996).
35. Phillips, J. B. & Endler, N. S. Academic examinations and anxiety: the interaction model empirically tested. *J. Res. Pers.* **16**, 303–318 (1982).
36. Debusscher, J., Hofmans, J. & De Fruyt, F. The curvilinear relationship between state neuroticism and momentary task performance. *PLoS One* **9**, e106989 (2014).
37. Karnehed, N., Rasmussen, F., Hemmingsson, T. & Tynelius, P. Obesity and attained education: cohort study of more than 700,000 Swedish men. *Obesity* **14**, 1421–1428 (2006).
38. Chandola, T., Deary, I. J., Blane, D. & Batty, G. D. Childhood IQ in relation to obesity and weight gain in adult life: the National Child Development (1958) Study. *Int. J. Obes.* **30**, 1422–1432 (2006).
39. Lawlor, D. A., Clark, H., Davey Smith, G. & Leon, D. A. Childhood intelligence, educational attainment and adult body mass index: findings from a prospective cohort and within sibling-pairs analysis. *Int. J. Obes.* **30**, 1758–1765 (2006).
40. Roskam, A.-J. R. *et al.* Comparative appraisal of educational inequalities in overweight and obesity among adults in 19 European countries. *Int. J. Epidemiol.* **39**, 392–404 (2010).
41. Caird, J. *et al.* *Childhood obesity and educational attainment: A systematic review.* (EPPI-Centre, Social Science Research Unit, Institute of Education, University of London)  
<[http://eprints.ioe.ac.uk/16316/1/Caird\\_et\\_al.\\_2011.\\_Childhood\\_obesity\\_and\\_educational\\_attainment.\\_a\\_systematic\\_review.pdf](http://eprints.ioe.ac.uk/16316/1/Caird_et_al._2011._Childhood_obesity_and_educational_attainment._a_systematic_review.pdf)> (2011).
42. Vermeiren, A. P. A. *et al.* Do genetic factors contribute to the relation between education and metabolic risk factors in young adults? A twin study. *Eur. J. Public Health* **23**, 986–991 (2012).
43. Nasser, J. A., Gluck, M. E. & Geliebter, A. Impulsivity and test meal intake in obese binge eating women. *Appetite* **43**, 303–307 (2004).
44. Franken, I. H. A. & Muris, P. Individual differences in reward sensitivity are related to food craving and relative body weight in healthy women. *Appetite* **45**, 198–201 (2005).
45. Tangney, J. P., Baumeister, R. F. & Boone, A. L. High self-control predicts good adjustment, less pathology, better grades, and interpersonal success. *J. Pers.* **72**, 271–324 (2004).
46. Duckworth, A. L. & Seligman, M. E. P. Self-discipline outdoes IQ in predicting academic performance of adolescents. *Psychol. Sci.* **16**, 939–944 (2005).

47. O'Doherty, J. P. Reward representations and reward-related learning in the human brain: insights from neuroimaging. *Curr. Opin. Neurobiol.* **14**, 769–776 (2004).
48. Reynolds, J. N., Hyland, B. I. & Wickens, J. R. A cellular mechanism of reward-related learning. *Nature* **413**, 67–70 (2001).
49. Pietschnig, J., Penke, L., Wicherts, J. M., Zeiler, M. & Voracek, M. Meta-analysis of associations between human brain volume and intelligence differences: how strong are they and what do they mean? *SSRN Electron. J.* (2014). doi:10.2139/ssrn.2512128
50. Bartels, M., Rietveld, M. J. H., Van Baal, G. C. M. & Boomsma, D. I. Heritability of educational achievement in 12-year-olds and the overlap with cognitive ability. *Twin Res.* **5**, 544–553 (2012).
51. Tambs, K., Sundet, J. M., Magnus, P. & Berg, K. Genetic and environmental contributions to the covariance between occupational status, educational attainment, and IQ: a study of twins. *Behav. Genet.* **19**, 209–222 (1989).
52. Osler, M., Lawlor, D. A. & Nordentoft, M. Cognitive function in childhood and early adulthood and hospital admission for schizophrenia and bipolar disorders in Danish men born in 1953. *Schizophr. Res.* **92**, 132–141 (2007).
53. Jones, P. Child developmental risk factors for adult schizophrenia in the British 1946 birth cohort. *Lancet* **344**, 1398–1402 (1994).
54. Loewenstein, D. A., Czaja, S. J., Bowie, C. R. & Harvey, P. D. Age-associated differences in cognitive performance in older patients with schizophrenia: a comparison with healthy older adults. *Am. J. Geriatr. Psychiatry* **20**, 29–40 (2012).
55. MacCabe, J. H. *et al.* Scholastic achievement at age 16 and risk of schizophrenia and other psychoses: a national cohort study. *Psychol. Med.* **38**, 1133–1140 (2008).
56. Kyaga, S. *et al.* Mental illness, suicide and creativity: 40-year prospective total population study. *J. Psychiatr. Res.* **47**, 83–90 (2013).
57. Kyaga, S. *et al.* Creativity and mental disorder: family study of 300,000 people with severe mental disorder. *Br. J. Psychiatry* **199**, 373–379 (2011).
58. Juda, A. The relationship between highest mental capacity and psychic abnormalities. *Am. J. Psychiatry* **106**, 296–307 (1949).
59. Isohanni, I. *et al.* Educational consequences of mental disorders treated in hospital. A 31-year follow-up of the Northern Finland 1966 Birth Cohort. *Psychol. Med.* **31**, 339–349 (2001).
60. Kremen, W. S. *et al.* A discordant twin study of premorbid cognitive ability in schizophrenia. *J. Clin. Exp. Neuropsychol.* **28**, 208–224 (2006).
61. Resnick, S. M. Matching for education in studies of schizophrenia. *Arch. Gen. Psychiatry* **49**, 246 (1992).



62. Craddock, N., O'Donovan, M. C. & Owen, M. J. Psychosis genetics: modeling the relationship between schizophrenia, bipolar disorder, and mixed (or 'schizoaffective') psychoses. *Schizophr. Bull.* **35**, 482–490 (2009).
63. Keogh, B. K. & Smith, C. E. Visuo-motor ability for school prediction: a seven-year study. *Percept. Mot. Skills* **25**, 101–110 (1967).
64. Holmes, J., Adams, J. W. & Hamilton, C. J. The relationship between visuospatial sketchpad capacity and children's mathematical skills. *Eur. J. Cogn. Psychol.* **20**, 272–289 (2008).
65. Gathercole, S. E., Pickering, S. J., Knight, C. & Stegmann, Z. Working memory skills and educational attainment: evidence from national curriculum assessments at 7 and 14 years of age. *Appl. Cogn. Psychol.* **18**, 1–16 (2004).
66. St Clair-Thompson, H. L. & Gathercole, S. E. Executive functions and achievements in school: shifting, updating, inhibition, and working memory. *Q. J. Exp. Psychol.* **59**, 745–59 (2006).
67. Dweck, C. S. Motivational processes affecting learning. *Am. Psychol.* **41**, 1040–1048 (1986).
68. Zimmerman, B. J., Bandura, A. & Martinez-Pons, M. Self-motivation for academic attainment: the role of self-efficacy beliefs and personal goal setting. *Am. Educ. Res. J.* **29**, 663–676 (1992).
69. Lleras, C. Do skills and behaviors in high school matter? The contribution of noncognitive factors in explaining differences in educational attainment and earnings. *Soc. Sci. Res.* **37**, 888–902 (2008).
70. Stern, Y. Influence of education and occupation on the incidence of Alzheimer's disease. *JAMA J. Am. Med. Assoc.* **271**, 1004–1010 (1994).
71. Stern, Y. Cognitive reserve. *Neuropsychologia* **47**, 2015–2028 (2009).
72. Stern, Y. Cognitive reserve in ageing and Alzheimer's disease. *Lancet. Neurol.* **11**, 1006–1012 (2012).
73. Scarmeas, N., Albert, S. M., Manly, J. J. & Stern, Y. Education and rates of cognitive decline in incident Alzheimer's disease. *J. Neurol. Neurosurg. Psychiatry* **77**, 308–316 (2006).
74. Ott, A. *et al.* Prevalence of Alzheimer's disease and vascular dementia: association with education. The Rotterdam study. *BMJ* **310**, 970–973 (1995).
75. Kemppainen, N. M. *et al.* Cognitive reserve hypothesis: Pittsburgh Compound B and fluorodeoxyglucose positron emission tomography in relation to education in mild Alzheimer's disease. *Ann. Neurol.* **63**, 112–118 (2008).

76. Paradise, M., Cooper, C. & Livingston, G. Systematic review of the effect of education on survival in Alzheimer's disease. *Int. Psychogeriatr.* **21**, 25–32 (2009).
77. Andel, R., Vigen, C., Mack, W. J., Clark, L. J. & Gatz, M. The effect of education and occupational complexity on rate of cognitive decline in Alzheimer's patients. *J. Int. Neuropsychol. Soc.* **12**, 147–152 (2006).
78. Swartz, M. S. *et al.* Substance use in persons with schizophrenia: baseline prevalence and correlates from the NIMH CATIE study. *J. Nerv. Ment. Dis.* **194**, 164–172 (2006).
79. Davies, G. *et al.* Genetic contributions to variation in general cognitive function: a meta-analysis of genome-wide association studies in the CHARGE consortium (N=53 949). *Mol. Psychiatry* **20**, 183–192 (2015).
80. Rietveld, C. A. *et al.* GWAS of 126,559 individuals identifies genetic variants associated with educational attainment. *Science* **340**, 1467–1471 (2013).
81. Bogg, T. & Vo, P. T. Openness, neuroticism, conscientiousness, and family health and aging concerns interact in the prediction of health-related Internet searches in a representative U.S. sample. *Front. Psychol.* **5(370)**, 1–10 (2014).
82. Lewis, G. *et al.* Socio-economic status, standard of living, and neurotic disorder. *Int. Rev. Psychiatry* **15**, 91–96 (2009).
83. Piras, F., Cherubini, A., Caltagirone, C. & Spalletta, G. Education mediates microstructural changes in bilateral hippocampus. *Hum. Brain Mapp.* **32**, 282–289 (2011).
84. Noble, K. G. *et al.* Hippocampal volume varies with educational attainment across the life-span. *Front. Hum. Neurosci.* **6**, 307 (2012).
85. Grazioplene, R. G. *et al.* Subcortical intelligence: caudate volume predicts IQ in healthy adults. *Hum. Brain Mapp.* **36**, 1407–1416 (2014).
86. Cheong, J. L. Y. *et al.* Contribution of brain size to IQ and educational underperformance in extremely preterm adolescents. *PLoS One* **8**, e77475 (2013).
87. MacLulich, A. M. J. *et al.* Intracranial capacity and brain volumes are associated with cognition in healthy elderly men. *Neurology* **59**, 169–174 (2002).
88. McDaniel, M. Big-brained people are smarter: a meta-analysis of the relationship between in vivo brain volume and intelligence. *Intelligence* **33**, 337–346 (2005).
89. Magnusson, P. K. E., Rasmussen, F. & Gyllensten, U. B. Height at age 18 years is a strong predictor of attained education later in life: cohort study of over 950,000 Swedish men. *Int. J. Epidemiol.* **35**, 658–663 (2006).
90. Cinnirella, F., Piopiunik, M. & Winter, J. Why does height matter for educational attainment? evidence from German children. *Econ. Hum. Biol.* **9**, 407–418 (2011).

91. Case, A. & Paxson, C. Stature and status: height, ability, and labor market outcomes. *NBER Bull. Aging Heal.* (2006).
92. Case, A. & Paxson, C. Height, health, and cognitive function at older ages. *Am. Econ. Rev.* **98**, 463–467 (2008).
93. Guven, C. & Lee, W. S. Height and cognitive function at older ages: is height a useful summary measure of early childhood experiences? *Health Econ.* **22**, 224–233 (2013).
94. Szklarska, A., Koziel, S., Bielicki, T. & Malina, R. M. Influence of height on attained level of education in males at 19 years of age. *J. Biosoc. Sci.* **39**, 575–582 (2007).
95. Courchesne, E. *et al.* Normal brain development and aging: quantitative analysis at in vivo MR imaging in healthy volunteers. *Radiology* **216**, 672–682 (2000).

## 4 Biological Annotation

In this section we describe, in greater detail than in the main text, the results from a number of analyses designed to elucidate the biological mechanisms through which DNA variation in our implicated genomic regions might influence educational attainment. Our treatment is much more extensive than in our previous reports because of the substantial increase in sample size, the novel bioinformatic techniques developed in the interim, and our intention to provide a walk-through of our methods and results that is accessible to readers who lack a biological background but are willing to consult appropriate resources for non-specialists when necessary.

Each of the following subsections describes a particular method of biological analysis and the specific results yielded in the present application. At the outset, however, we provide some broad introductory material.

The word *gene* has several distinct meanings across different subfields of genetics. Originally, in classical and population genetics, a gene was an indivisible token of hereditary material that could occupy a specific *locus* (discrete location in the genome). The genes at a particular locus might fall into distinct classes, called *alleles*. Adopting this terminology, we can say that an individual's genome carries two genes at each locus, one inherited from each parent, possibly of the same allelic type (in which case the individual is said to be *homozygous* at the locus) or different allelic types (*heterozygous*).

In most of this paper, however, we use *gene* in a more modern sense: a contiguous region of the type genome (e.g., the “human genome”), spanning many base pairs, whose *expression* or *transcription* leads to a particular biological product—typically a messenger RNA (mRNA) transcript, the *translation* of which leads to the production of a protein. *Proteins* are the basic structural and functional units of the cell; examples of proteins include subunits of neurotransmitter receptors, enzymes catalyzing metabolic processes such as the breakdown of neurotransmitter in the synaptic cleft, and transporters that enable a presynaptic neuron to reabsorb neurotransmitter that has just been released. Since *locus* is also used nowadays to designate a region encompassing many base pairs, it is preferable to adopt a different term to single out a point-like location in the genome. We use the term *site* for this purpose; the term *variant* is also often used in the literature to refer to a polymorphic site, although we avoid this term because it often shades into a synonym of *allele*. The latter term is still used in modern genetics to specify a distinct class of base pairs that can occupy a particular site; the different possible alleles at a *single-nucleotide polymorphic* (SNP) site are the familiar G, C, T, and A.

Note that non-expressed portions of the genome that do not encode proteins or other products for use in the cell are not genes at all in the modern sense (although the base pairs inherited by the offspring that reside at such locations are still genes in the classical sense). If two regions of the genome are known to be genes because they are transcribed into mRNA at certain times in certain cell types, then the gene-barren region *between* them is often called “intergenic.”

A *nonsynonymous* SNP—which necessarily lies *within* a gene—changes the composition and biological properties of the encoded protein. Such a SNP might do this if the two alleles

specify distinct types of amino acids to be incorporated into the final protein sequence. Another possibility is that one allele is a stop signal leading to termination of transcription. A SNP or other type of polymorphic site *outside* of a gene can only have a phenotypic effect by affecting the *regulation* of the gene product in some manner. (The illustration that follows is indeed merely illustrative; many mechanisms of gene regulation are still not well understood.) A SNP far from a gene when the chromosome is treated as a one-dimensional string may actually lie in an *enhancer* that can be close to the transcription start site in the three-dimensional reality of the cell nucleus, and the specific allele present at such a SNP may affect the binding of the various proteins that must assemble at the start site to initiate the expression of the gene. *Regulation* refers to the modulation of gene expression's timing, abundance, or cell-type specificity by such mechanisms, and it is in fact likely that most GWAS signals are due to sites affecting regulation as opposed to encoding differences in protein composition. Gene expression itself can be directly measured by assaying the abundance in the cell of mRNA transcripts that map to a given gene, and indeed we make use of several databases recording the results of such measurements in our various analyses.

In the GWAS literature, the term *locus* has come to mean a stretch of the genome centered on a SNP showing the strongest evidence of association within a broader region. A locus in this sense is variously defined in terms of physical distance (e.g.,  $\pm 250$  kilobases), genetic distance (recombination probability), or decay of linkage disequilibrium. Two SNPs are in *linkage disequilibrium* (LD) if they are correlated—that is, if the allele present at one site tends to be found in the same chromosomes as a particular allele at the other. Indeed, a standard measure of LD between two sites,  $r^2$ , is simply the squared Pearson correlation between counts of the respective reference alleles within phased haplotypes.

This background suffices to motivate the biological questions that arise in the interpretation of GWAS results and the means by which these questions might be tentatively addressed. For starters, since a GWAS locus typically contains many other SNPs in LD with the defining lead SNP and with each other, it is natural to ask: which of these SNPs is the actual *causal* site responsible for the downstream phenotypic variation? Many SNPs in the genome appear to be biologically inert—neither encoding differences in protein composition nor affecting gene regulation—and a lead GWAS SNP may fall into this category and nonetheless show the strongest association signal as a result of statistical noise or happenstance LD with multiple causal sites. Fortunately, much is known from external sources of data about whether variation at a particular site is likely to have biological consequences, and exploiting these resources is our general strategy for *fine-mapping* loci: nominating individual sites that may be causally responsible for the GWAS signals. Descriptions of genomic sites or regions based on external sources of data are known as *annotations*, and readers will not go far astray if they interpret this term rather literally (as referring to a note of explanation or comment added to a text in one of the margins). If we regard the type genome as the basic text, then annotations are additional comments describing the structural or functional properties of particular sites or the regions in which they reside. For example, all nonsynonymous sites that influence protein structures might be annotated as such. An annotation can be far more specific than this; for instance, all sites that fall in a regulatory region active in the fetal liver might bear an annotation to this effect.

A given causal site will exert its phenotypic effect through altering the composition of a gene product or regulating its expression. Conceptually, once a causal site has been identified or at least nominated, the next question to pursue is the identity of the mediating gene. In practice, because only a handful of genes at most will typically overlap a GWAS locus, we can make

some progress toward answering this question without precise knowledge of the causal site. The difficulty of the problem, however, should still not be underestimated. It is natural to assume that a lead GWAS SNP lying inside the boundaries of a particular gene must reflect a causal mechanism involving that gene itself, but in certain cases such a conclusion would be premature. It is possible for a causal SNP lying inside a certain gene to exert its phenotypic effect by regulating the expression of a nearby gene or for several genes to intervene between the SNP and its regulatory target.

Supplementary Table 4.1 ranks each gene overlapping a DEPICT-defined locus by the number of discrete evidentiary items favoring that gene (see Supplementary Information section 4.5 for details regarding DEPICT). These lines of evidence are taken from a number of our analyses to be detailed in the following subsections. Our primary tool for gene prioritization is DEPICT, which can be used to calculate a  $P$ -value and associated FDR for each gene. It is important to keep in mind, however, that a gene-level  $P$ -value returned by DEPICT refers to the tail probability under the null hypothesis that random sampling of loci can account for annotations and patterns of co-expression shared by the focal gene with genes in all other GWAS-identified loci. Although it is very reasonable to expect that genes involved in the same phenotype do indeed share annotations and patterns of co-expression, it may be the case that certain causal genes do not conform to this expectation and thus fail to yield low DEPICT  $P$ -values. This is why we do not rely on DEPICT alone but also the other lines of evidence described in the caption of Supplementary Table 4.1.

The products of genes do not work in isolation to construct and maintain whole organisms. Rather, multiple gene products participate in a particular *pathway* that serves a distinct biological function. (The term *pathway* appears to be derived from the chains of causal/temporal arrows often used in illustrations of unfolding cellular processes.) If one considers neural signaling, it becomes clear that several gene products are needed to construct ion channels, reuptake transporters, neurotransmitter receptors, and so forth. On the basis of massive experimental evidence, biologists have constructed catalogs of pathways defined at different levels of organization, each containing several proteins or other gene products. We make heavy use of these catalogs here; in essence, we single out a pathway as likely to be particularly important in the biology of the phenotype if it encompasses an unusually large number of genes overlapping our GWAS loci.

Pathways are often defined in a manner that spans different tissue or cell types. For example, a particular pathway may involve a ligand (signaling molecule) that is found in both the nervous and digestive systems. Prioritizing particular tissues is conceptually parallel to prioritizing pathways, and we employ similar methods for both types of biological follow-up.

To summarize, our biological analyses seek provisional answers to the following questions:

1. Which polymorphic sites in our GWAS loci are the actual causal sites responsible for downstream variation in *EduYears*?
2. Which genes (protein-coding regions of the genome) mediate the effects of the causal sites on *EduYears*?
3. Which biological pathways contribute to variation in cognitive performance and other psychological attributes affecting *EduYears*?
4. Once certain biological mechanisms are implicated, can we determine the tissues and cell types where they are active?

The method-specific subsections are arranged in an order that very roughly addresses these questions in turn.

## 4.1 Look-up of Nonsynonymous Status, eQTL Effects, Associations with other Phenotypes, and Predicted Gene Functions

### 4.1.1 Overview

Here we conduct a number of follow-up analyses that are now routinely used to gain some biological insight into GWAS results. We document the sites among the lead SNPs taken forward from our GWAS of *EduYears* (or sites in strong LD with those SNPs) that fall into one of the following three classes: (1) nonsynonymous SNPs that alter the composition of the protein encoded by a gene, (2) eQTLs that are associated with the abundance of mRNA transcript in whole blood or in tissue from three distinct brain regions, and (3) SNPs associated with other phenotypes in large-scale GWAS. A notable finding is that a top *EduYears*-associated SNP is concordantly associated with head circumference in infants. As an additional look-up exercise, we used the Gene Network tool to ascertain the predicted functions of our prioritized genes and the tissues in which these genes are expressed.

### 4.1.2 Background

A subset of SNPs within a list of top GWAS SNPs—or, alternatively, SNPs in strong LD with the top SNPs—may be highlighted as promising candidates for causality if they fall within a class of sites that are more likely to have phenotypic effects. One such class consists of nonsynonymous SNPs. It is now believed that a majority of GWAS signals across all studied phenotypes are owed to causal sites that are regulatory rather than coding<sup>1,2</sup>, but nevertheless a SNP is much more likely to have some phenotypic effect if it is coding<sup>2,3</sup>.

Another promising class of sites consists of *expression quantitative trait loci* (eQTLs), which in this context can be defined as SNPs that have been shown to be associated with the abundance of one or more mRNA transcripts. eQTLs are thus promising candidates for regulating the expression of their corresponding genes. A greater quantity of transcript does not invariably lead to greater abundance of the corresponding protein in the cell, and it is the latter that is of biological significance. Typically, however, the correlation between gene expression and protein concentration is  $\sim 0.65$ <sup>4</sup>.

If an eQTL and its regulated gene are relatively close to each other in the genome, the eQTL is said to act in *cis* (as opposed to in *trans*), although refinements of this terminology are also in use<sup>5</sup>. eQTLs are identified in studies that are analogous to GWAS, except that the phenotypes are gene expression (mRNA transcript levels) rather than high-level traits. The effect sizes of eQTLs and hence the statistical power to detect them are fairly sizable because of the short causal chain from variation in regulatory DNA sequence to the expression of the regulated gene, although it is almost certainly the case that many thousands of eQTLs remain to be detected<sup>5</sup>. SNPs associated with complex traits in GWAS are more likely to be eQTLs than other SNPs with similar minor allele frequencies that are also assayed by genotyping chips<sup>6</sup>.

To pick out candidates for causal sites giving rise to our GWAS signals, we determined whether any lead *EduYears*-associated SNPs are in LD with nonsynonymous SNPs or eQTLs (or are themselves sites of these two types).

We also determined whether any of our lead SNPs has emerged as a top signal in GWAS of other phenotypes. *EduYears* shows extensive genetic overlap with many other traits (Supplementary Information section 3), and identifying candidates for the genomic sites at the heads of the causal forks or chains responsible for these genetic correlations is another promising means of shedding light on underlying biological and behavioral mechanisms.

#### 4.1.3 Nonsynonymous Sites in Strong LD with Lead *EduYears*-Associated SNPs

We used the tool HaploReg ([http://www.broadinstitute.org/mammals/haploreg/haploreg\\_v3.php](http://www.broadinstitute.org/mammals/haploreg/haploreg_v3.php)) to identify nonsynonymous SNPs in strong LD ( $r^2 \geq 0.6$ ) with at least one of the 74 lead SNPs associated with *EduYears*. In total we identified 17 such SNPs, including two of our lead SNPs themselves (Supplementary Table 4.1.1).

rs11588857 resides within *LRRN2*, which encodes a leucine-rich repeat found in neurons; proteins in this family are often involved in cell-cell adhesion. According to the Gene Network tool (to be described later in the subsection), *LRRN2* is predicted to be active in several neural pathways, including SYNAPSE ORGANIZATION, POSITIVE REGULATION OF NERVOUS SYSTEM DEVELOPMENT, and REGULATION OF TRANSMISSION OF NERVE IMPULSE.

rs35761247 resides in *COL7A1*, which encodes a product incorporated into collagen (the main structural element of connective tissues such as tendons and ligaments). This gene does not seem to be a promising *a priori* candidate for affecting *EduYears*, and in fact our various sources of evidence point to other genes in the region where this SNP is found (Supplementary Table 4.1). It is possible that the causal site responsible for this association signal is in LD with this particular nonsynonymous SNP.

#### 4.1.4 Blood *cis*-eQTL Look-up

We conducted gene expression analyses of whole peripheral blood from a total of 2,360 unrelated individuals: 1,240 individuals from the Fehrman cohort measured with the Illumina HT12v3 platform<sup>7</sup>; 229 individuals from the Fehrman cohort measured with the Illumina H8v2 platform<sup>7</sup>; and 891 individuals from EGCUT<sup>8</sup>.

The analysis of the Fehrman samples was confined to the SNPs shared by the Illumina HumanHap300, HumanHap370, and 610 Quad SNP genotyping platforms. SNPs with MAF < 0.05, call rate < 0.95, or HWE *P*-value < 0.001 were excluded from further analysis. In the EGCUT sample, duplicates were used to assess genotyping reproducibility. The per-individual call rate had to be at least 0.95 for individuals to be included in subsequent analyses. Closely related individuals were identified using the proportion of the genome shared identical by descent (IBD), and the relative with the lower call rate was removed. SNPs with MAF < 0.01, call rate < 0.99, or HWE *P*-value <  $1 \times 10^{-5}$  were excluded from further analysis. Data were harmonized by imputation to dosages using the 1000 Genomes March 2012 combined reference panel.



In each sample the following additional steps were taken. Gene expression data were quantile normalized to the median distribution and subsequently  $\log_2$  transformed. Probe and individual means were centered to zero. (A “probe” is an element of a microarray designed to capture a specified mRNA transcript.) Gene expression data were then corrected for possible population structure by linear regression on the first four multidimensional scaling components derived from the genotypic data. We residualized the resulting variables on the projections of the individuals on the first 40 principal components (PCs) derived from the probe covariance matrix of the expression data that did not show evidence of association with any genotype meeting the  $P$ -value threshold corresponding to  $FDR < 0.05$  (see below). Any expression PC showing a significant association with a SNP might represent a biologically meaningful effect of the SNP on the expression of multiple genes, and therefore it is important not to remove such PCs.

*cis*-eQTL mapping was performed as described elsewhere<sup>9</sup>, with one difference: we deemed a SNP a potential *cis*-eQTL when the distance between the SNP and the midpoint of the probe was smaller than 1Mb, instead of smaller than 250kb. The precise upper bound on the distance between a *cis*-eQTL and its regulatory target is a matter of arbitrary definition at this point<sup>5</sup>, and we elected to relax the required proximity.

We only included probes that were present on the HT12v3 platform. We only tested SNP-probe pairs when the SNP passed quality control in at least two of the three samples. We tested the associations between the genotype dosages of the lead 74 SNPs from our GWAS meta-analysis of *EduYears* and the gene expression values. The three datasets, each weighted by sample size, were subsequently meta-analyzed. We then permuted the sample labels and repeated this analysis 100 times. We set the FDR to 0.05, using the permuted datasets to ascertain the null distribution of the nominal  $P$ -value.

An apparent *cis*-eQTL effect may often be the result of a nearby causal SNP in high LD with the query SNP. In order to determine whether the lead *EduYears* SNPs have independent *cis*-eQTL effects or are merely markers for nearby causal SNPs, we performed a conditional analysis. Using the procedure described above, we first determined which SNP shows the strongest *cis*-eQTL effect for each probe associated with any of the 74 lead *EduYears* SNPs. After partialing out the effect of the strongest *cis*-eQTL using linear regression, we repeated the tests of association between the *EduYears* SNPs and the highlighted probes. The significance threshold corresponding to  $FDR < 0.05$  was again estimated with 100 permutations.

We applied the above-described methodology to our 74 top *EduYears* SNPs and found that 33 SNPs were significant *cis*-eQTLs for 72 genes (98 array probes; the number of probes for mRNA transcripts can be greater than the number of corresponding genes because various splicing and editing mechanisms can lead a given gene to produce several distinct transcripts). None of our *EduYears* SNPs was identified as the strongest *cis*-eQTL for its probe. 14 SNPs did show an independent effect on expression after conditioning on the best *cis*-eQTL for the given probe.

The effect sizes and  $P$ -values of those lead *EduYears* SNPs proving to be significant blood *cis*-eQTLs are presented in Supplementary Table 4.1.2.

#### 4.1.5 Brain cis-eQTL Look-up

To determine whether any of the lead *EduYears* SNPs are associated with gene expression levels in human neural tissue, we utilized data from the Harvard Brain Tissue Research Center. The total sample of 742 individuals is comprised of 376 late-onset Alzheimer's disease patients (LOAD), 193 Huntington's disease patients (HD), and 173 individuals without a known neurological disorder (healthy). The resource contains data on expression levels obtained from postmortem brains and measured in three distinct regions: dorsolateral prefrontal cortex, visual cortex, and cerebellum. Although it is reasonable to expect that causal sites affecting educational attainment will enrich brain-specific *cis*-eQTLs, we note that the sample size of our blood dataset is ~3 times larger.

The extensive quality control and probe-data normalization steps are described in detail elsewhere<sup>10</sup>. After these steps, 39,579 probes were taken forward as dependent variables for subsequent eQTL analysis. We eliminated SNPs exhibiting MAF < 0.01, HWE *P*-value < 10<sup>-6</sup>, or call rate < 0.95. After applying these filters, 838,958 SNPs remained. For each probe we used a Kruskal-Wallis test to test all SNPs within 1Mb of the corresponding gene's transcription start site for association with expression level. To take into account the complex correlation structure of this dataset, we estimated an empirical FDR: the ratio of the average number of eQTLs meeting a candidate threshold in datasets with randomly permuted sample labels to the number of eQTLs meeting that same threshold in the original dataset. Since the number of tests was large, the empirical null distribution converged after a relatively small number of permutation runs; thus, we used ten permutation runs to estimate the empirical FDR. We focus on the associations that survived after constraining the empirical FDR to be less than 0.10 (which corresponds to a nominal *P*-value cutoff of approximately 5×10<sup>-5</sup>).

Supplementary Table 4.1.3 lists the relevant effect sizes, *P*-values, LD measures, and brain regions. In short, of our 74 lead *EduYears* SNPs, 15 (as represented by 28 LD proxies) were significant *cis*-eQTLs for 25 probes (which happen to represent exactly 25 genes). We observed eQTLs (counting lead *EduYears* SNPs and not proxies) active in all three brain areas: 13 in dorsolateral prefrontal cortex, 11 in visual cortex, and 12 in cerebellum. Most of the apparent effects were observed in all samples, except rs12987662 (its proxy rs6722241 significant in LOAD only), rs572016 (its proxy rs3213566 significant in LOAD only), and rs1043209 (its proxy rs11157390 significant in HD only). Since these inconsistencies may be due to inadequate statistical power, we did not use them as a basis for deprioritization.

#### 4.1.6 GWAS Look-up

Consulting the NHGRI GWAS catalog (<http://www.genome.gov/gwastudies>), we extracted previously reported significant GWAS signals within a 500kb radius of any lead *EduYears*-associated SNP and also in LD with this focal SNP to the extent  $r^2 \geq 0.6$  (1000 Genomes CEU). We excluded traits studied in our proxy-phenotype analysis (Supplementary Information section 3). To be clear, we are looking here for *EduYears* SNPs or LD partners of such SNPs reaching genome-wide significance in a GWAS of any trait.

We found that 6 of our 74 lead *EduYears* SNPs are (in close proximity to) signals reaching the significance threshold  $P < 5 \times 10^{-8}$  in other published GWAS. Supplementary Table 4.1.4 lists the results. Perhaps the most interesting overlap occurs at rs7306755, which is in strong LD ( $r^2 = 0.99$ ) with a SNP associated with head circumference in infants. Looking up the proxy SNP in our meta-analysis results, we found that the effect signs are concordant; the allele associated with increased *EduYears* is also associated with increased head

circumference. In our proxy-phenotype analysis, the lead SNP is also concordantly associated with intracranial volume in adults, although not significantly so ( $P = 0.33$ ).

In contrast to infant head circumference and those traits studied in our proxy-phenotype analysis, the cancers and autoimmune disorders in Supplementary Table 4.1.4 for the most part offer little *a priori* reason to invoke a connection with cognition or personality. Results such as these, obtained from GWAS of apparently unrelated phenotypes, may contribute to the debate over the extent and evolutionary importance of pleiotropy<sup>11</sup>. One possibility is that a relatively small fraction of polymorphic sites are functional, implying that many sites are necessarily pleiotropic if polygenicity is the rule, but that effects on two traits are often discordant and thus do not necessarily lead to a sizable genetic correlation. Any inferences from such results, however, must be tentative in the absence of knowledge regarding the precise causal sites responsible for these GWAS signals. For instance, a SNP with apparent effects on two distinct traits may be tagging a causal site affecting one trait and an entirely different causal site affecting the other trait. However, even if the most that can be said at present is that functional SNPs tend to reside in the same genomic regions, the findings are still relevant to the discussion of pleiotropy, which becomes the limit of a more general investigation into the effects of linkage and LD on natural selection and neutral variation<sup>12</sup>.

#### **4.1.7 Using Co-Expression to Predict Gene Function**

We used a recently developed method (implemented by Fehrmann *et al.*<sup>13</sup> and more extensively described in Supplementary Information section 4.5) to gain insight into the functions of the genes prioritized by DEPICT, our chief tool for gene nomination. We queried the co-expression database described by ref. 13 (<http://www.genenetworki.nl:8080/GeneNetwork/mgi.html>) with each of our DEPICT-prioritized genes (Supplementary Table 4.1). After using the symbol of the focal gene as the search term, we recorded all results listed under Gene Ontology (GO)<sup>14</sup> biological process, cellular compartment, and molecular function that were indicated to be statistically significant. We also recorded the analogous results that were listed under the Reactome<sup>15</sup> and Kyoto Encyclopedia of Genes and Genomes (KEGG)<sup>16</sup> pathways. We then recorded all tissues, organs, and cell types (“tissues”) where the area under the receiver operating characteristic curve (AUC) with respect to the discriminating power of measured gene expression exceeds 0.80. The AUC in each case was derived from the difference between the samples of the focal tissue and all other tissues in the distribution of the query gene’s expression level, as determined by text-mining the descriptions provided by experimenters who uploaded expression data to the Gene Expression Omnibus (GEO). Note that the tissue/cell type labels taken from the Medical Subject Headings (MeSH) database can refer to different levels of a hierarchy and therefore are not mutually exclusive in application.

We hasten to add that this look-up exercise cannot produce results as comprehensive as those of DEPICT when this latter tool is used to highlight biological pathways and tissues (Supplementary Tables 4.5.1 and 4.5.2). The advantage of the Gene Network look-up is ease of use and the provision of some intuition regarding the output of the more sophisticated DEPICT procedures described in Supplementary Information section 4.5.

The results of the look-up exercise can be found in Supplementary Table 4.1.5, which lists the 10 most frequently occurring search results yielded by each data source and their respective counts. It is immediately apparent that the table is dominated by terms related to the brain. Many of the terms concern transmission of signals across the *synapse*, the junction

between two neurons typically consisting of the axon terminal, a dendritic spine, and the extracellular cleft between terminal and spine. (An *axon* is the output cable of a neuron; a *dendrite* is a short protrusion extending from a neuron, along which messages from other neurons are conveyed to the cell body.) Glutamate is the excitatory neurotransmitter most commonly used to relay messages across the synapse, and many of the synaptic terms single out this ligand in particular (e.g., GLUTAMATE RECEPTOR ACTIVITY). These results recapitulate the findings from our earlier study of cognitive performance<sup>17</sup>. There are a number of terms concerning neural development, including NEURON CELL-CELL ADHESION, TELENCEPHALON DEVELOPMENT, AXON GUIDANCE, and NOTCH SIGNALING PATHWAY. Another noteworthy trend is the presence of many terms related to chromatin modification (e.g., CHROMATIN REMODELING COMPLEX). Although tissue-specific gene expression *per se* is not employed by DEPICT to prioritize genes, the most frequently returned tissues where DEPICT-prioritized genes are more highly expressed than in other tissues are all neural. The three most frequent terms are PREFRONTAL CORTEX, FRONTAL LOBE, and HIPPOCAMPUS.

## References

1. 1000 Genomes Project Consortium. A map of human genome variation from population-scale sequencing. *Nature* **467**, 1061–1073 (2010).
2. Gusev, A. *et al.* Partitioning heritability of regulatory and cell-type-specific variants across 11 common diseases. *Am. J. Hum. Genet.* **95**, 535–552 (2014).
3. Finucane, H. K. *et al.* Partitioning heritability by functional category using GWAS summary statistics. *Nat. Genet.* **47**, 1228–1235.
4. Vogel, C. & Marcotte, E. M. Insights into the regulation of protein abundance from proteomic and transcriptome analyses. *Nat. Genet. Rev.* **13**, 227–232 (2012).
5. Albert, F. W. & Kruglyak, L. The role of regulatory variation in complex traits and disease. *Nat. Genet. Rev.* **16**, 197–212 (2015).
6. Nicolae, D. L. *et al.* Trait-associated SNPs are more likely to be eQTLs: annotation to enhance discovery from GWAS. *PLoS Genet.* **6**, e1000888 (2010).
7. Fehrmann, R. N. S. *et al.* Trans-eQTLs reveal that independent genetic variants associated with a complex phenotype converge on intermediate genes, with a major role for the HLA. *PLoS Genet.* **7**, e1002197 (2011).
8. Metsplau, A. The Estonian Genome Project. *Drug Dev. Res.* **62**, 97–101 (2004).
9. Westra, H.-J. *et al.* MixupMapper: Correcting sample mix-ups in genome-wide datasets increases power to detect small genetic effects. *Bioinformatics* **27**, 2104–2111 (2011).
10. Zhang, B. *et al.* Integrated systems approach identifies genetic nodes and networks in late-onset Alzheimer's disease. *Cell* **153**, 707–720 (2013).

11. Wagner, G. P. & Zhang, J. The pleiotropic structure of the genotype-phenotype map: the evolvability of complex organisms. *Nat. Rev. Genet.* **12**, 204–213 (2011).
12. Good, B. H., Walczak, A. M., Neher, R. A. & Desai, M. M. Genetic diversity in the interference selection limit. *PLoS Genet.* **10**, e1004222 (2014).
13. Fehrmann, R. N. S. *et al.* Gene expression analysis identifies global gene dosage sensitivity in cancer. *Nat. Genet.* **47**, 115–125 (2015).
14. Ashburner, M. *et al.* Gene ontology: tool for unification of biology. *Nat. Genet.* **25**, 25–29 (2000).
15. Croft, D. *et al.* Reactome: a database of reactions, pathways and biological processes. *Nucleic Acids Res.* **39**, D691–D697 (2010).
16. Kanehisa, M., Goto, S., Sato, Y., Furumichi, M. & Tanabe, M. KEGG for integration and interpretation of large-scale molecular data sets. *Nucleic Acids Res.* **40**, D109–D817 (2014).
17. Rietveld, C. A. *et al.* Common genetic variants associated with cognitive performance identified using the proxy-phenotype method. *Proc. Natl. Acad. Sci. USA* **111**, 13790–13794 (2014).

## 4.2 Enrichment Analysis and Fine-Mapping of GWAS Signals with fgwas

### 4.2.1 Overview

We briefly describe the intuition behind fgwas, a method for using GWAS results and functional-genomic data to (1) identify the types of polymorphic sites in the genome that are most likely to influence a trait and (2) use this information to fine-map GWAS loci and identify additional loci. We then describe an application of this method to our GWAS of *EduYears*. The annotations that most improve the probability of an association between a genomic region and *EduYears* are those that indicate gene regulatory regions in the fetal brain. This pattern of enrichment has not previously been observed in applications of fgwas to 18 other phenotypes. Furthermore, on the assumption that a single causal SNP is responsible for a given association signal, we use the functional enrichments to identify 17 SNPs with a strong probability of causality.

### 4.2.2 Background

A GWAS can be used to assess, for millions of polymorphic sites in the genome, the evidence that the genotype at the site is associated with the phenotype. In general, when deciding if the evidence for association meets some threshold of statistical significance, each site is treated in the same way—that is, we set some threshold (typically,  $P < 5 \times 10^{-8}$ ) and consider all sites passing this threshold to be significant.

However, *a priori* we know that some SNPs are more likely to be associated with the phenotype than others; for example, it is often assumed that nonsynonymous SNPs are more likely to influence phenotypes than sites that fall far from all known genes. So a  $P$ -value of  $5 \times 10^{-7}$ , say, though not typically considered significant at the genome-wide level, might merit a second look if the SNP in question is nonsynonymous.

Formalizing this intuition can be done with Bayesian statistics, which combines the strength of evidence in favor of a hypothesis (in our case, that a genomic site is associated with a phenotype) with the prior probability of the hypothesis. Deciding how to set this prior is often subjective. However, if many hypotheses are being tested (for example, if there are thousands of nonsynonymous polymorphisms in the genome), then the prior can be estimated from the data themselves using what is called “empirical Bayes” methodology. For example, if it turns out that SNPs with low  $P$ -values tend to be nonsynonymous sites rather than other types of sites, then the prior probability of true association is increased at all nonsynonymous sites. In this way a nonsynonymous site that otherwise falls short of the conventional significance threshold can become prioritized once the empirically estimated prior probability of association is taken into account. Note that such favorable reweighting of sites within a particular class is not set *a priori*, but is learned from the GWAS results themselves.

In our case, we split the genome into approximately independent blocks and estimate the prior probability that each block contains a causal SNP that influences the phenotype and (within each block) the conditional prior probability that each individual SNP is the causal one. Each such probability is allowed to depend on annotations describing structural or functional properties of the genomic region or the SNPs within it. We can then empirically estimate to extent to each annotation predicts association with the focal phenotype. For a complete description of the fgwas method, see ref. 1.

### 4.2.3 Methods

For application to the GWAS of *EduYears*, we used the same set of 450 annotations as ref. 1; these are available at <https://github.com/joepickrell/1000-genomes>. The annotations include elements of gene structure (e.g., nonsynonymous sites, untranslated regions following stop signals), several hundred genomic regions identified as DNase hypersensitive in a variety of tissues and cell lines<sup>2,3</sup>, and segmentations of the genome in the six ENCODE cell lines<sup>4</sup>. A *segmentation* in this sense is a partition of the genome that uses a hidden Markov model or similar mathematical construct to assign a somewhat high-level “state” to each segment of the partition. The states are inferred from the correlation structure of low-level features such as histone marks and transcription factors. The states in the segmentations based on the ENCODE data were learned in an unsupervised fashion—meaning that the methods were not initially trained on portions of the genome already labeled with *a priori* state-like annotations—but can be interpreted *post hoc* as regions of the genome that (in a given cell type) are:

1. targets of the transcription-regulating protein CTCF;
2. enhancers (regions that bind transcription factors);
3. promoter flankers (regions near the transcription start sites of actively expressed genes);
4. repressed chromatin (regions where transcription factors are prevented from binding);
5. transcribed regions, including exons and introns;
6. active transcription start sites; and

## 7. weak enhancers.

The segmentations were performed on each cell line independently, but the outputs are somewhat similar due to the biology shared across different tissues.

Since DNase I hypersensitive regions will feature prominently in our results, it is worthwhile to describe them here. (In the literature these are commonly referred to as DNase I hypersensitive “sites.” In keeping with our reservation of this term for atomic positions in the genome, however, we will use the alternative “regions.”) At any given time, in any given cell, much of the DNA making up the genome is tightly wound around spool-like proteins known as *histones*; collectively, the DNA, histones, and other proteins and RNA packaged together in this way are called *chromatin*. In those parts of the genome known as *DNase I hypersensitive* regions, the DNA is readily degraded by the enzyme DNase I. A finding of DNase I hypersensitivity is often taken as evidence of regulatory mechanisms having unpacked the chromatin and thereby exposed the constituent DNA to transcription factors and other proteins involved in gene expression. Whether a specific genomic region is DNase I hypersensitive depends on the cellular and temporal context, as regulatory mechanisms target a level of gene expression appropriate to the cell type and developmental stage.

We labeled each of the ~9 million SNPs in our GWAS of *EduYears* with any of the 450 annotations for which it qualified; note that several of these annotations refer to independent replicates of the same experiments. We then ran fgwas as described in ref. 1 with two exceptions. First, instead of splitting the genome into blocks containing equal numbers of SNPs, we split it into approximately independent blocks identified from patterns of linkage disequilibrium in the 1000 Genomes Project European-ancestry populations (using the `-bed flag`)<sup>5</sup>. Second, we needed to set a prior variance of effect size to calculate the Bayes factor measuring the evidence in favor of association and previously had used a fixed value of 0.1. Here, we averaged over three Bayes factors calculated with prior variances equaling 0.01, 0.1, and 0.5.

### 4.2.4 *Single-Annotation Models*

Shown in Extended Data Fig. 7a are the top 50 annotations when considering each individually, ordered so that the annotations that most improve the likelihood of the model are at the top. The individual annotation that most improves the model likelihood is DNASE (FETAL BRAIN) (4.69-fold increase in odds of association; 95% confidence interval 2.89–7.07). Several independent replicates of the experiments assaying DNase I hypersensitivity in the fetal brain are also referred to by the top annotations. (We have no adult brain tissues in this database. Each of the experiments assaying DNase I hypersensitive regions in the fetal brain was performed independently.) Furthermore, in line with 18 other phenotypes previously analyzed with fgwas, transcriptionally repressed chromatin is significantly depleted of SNPs associated with *EduYears*. Note that in the analyses applying these exact same annotations to the GWAS of the 18 other traits, we did not see any trait enriched by SNPs residing in genomic regions that are DNase I hypersensitive in the brain.

### 4.2.5 *Combined Model*

Many sites in the genome satisfy criteria for multiple annotations, and it is of interest to determine the independent contribution of each annotation in a manner analogous to multiple regression. Using forward selection and cross-validation to avoid overfitting<sup>1</sup>, we built a

combined model including the effects of multiple annotations. Extended Data Fig. 7b displays the results of the combined model that maximizes the cross-validation likelihood. In the combined model are annotations referring to transcription in HepG2 (a cell line derived from the liver of a patient with hepatocellular carcinoma) and HeLa (a cell line derived from a cancerous cervix). Crucially, the model-selection procedure retained two different annotations referring to DNase I hypersensitive regions identified in the fetal brain.

#### 4.2.6 *Reweighted GWAS and Fine Mapping*

We reweighted the GWAS results using the functional-genomic results described above. Using a regional posterior probability of association (PPA) greater than 0.90 as the cutoff, we identified 102 regions likely to harbor a causal SNP with respect to *EduYears* (Extended Data Fig. 7c and Supplementary Table 4.2.1). All but two of our 74 lead *EduYears*-associated SNPs fall within one of these 102 regions. The exceptions are rs3101246 and rs2837992, which attained  $PPA > 0.80$  (Extended Data Fig. 7c). In previous applications of fgwas, the majority of novel loci that attained the equivalent of genome-wide significance only upon reweighting later attained the conventional  $P < 5 \times 10^{-8}$  in larger cohorts<sup>1</sup>.

Within each region attaining  $PPA > 0.90$ , each SNP received a conditional posterior probability of being the causal SNP (under the assumption that there is just one causal SNP in the region). The method of assigning this latter posterior probability is similar to that of ref. 6, except that the input Bayes factors are reweighted by annotation-dependent and hence SNP-varying prior probabilities. In essence, the likelihood of causality at an individual SNP derives from its Bayes factor with respect to phenotypic association (which is monotonically related to the  $P$ -value under reasonable assumptions), whereas the prior probability is derived from any empirical genome-wide tendency for the annotations borne by the SNP to predict evidence of association. Thus, the SNP with the largest posterior probabilities of causality tend to exhibit among the strongest  $P$ -values within their loci and functional annotations that predict association throughout the genome. Note that proper calibration of this posterior probability requires that all potential causal sites have been either genotyped or imputed, which may not be the case in our application; we did not include difficult-to-impute non-SNP sites such as insertions/deletions in the GWAS meta-analysis. With this caveat in mind, we identified 17 regions where fine mapping amassed over 50 percent of the posterior probability on a single SNP (Supplementary Table 4.2.2). Of our 74 lead *EduYears* SNPs, 9 are good candidates for being the causal sites driving their association signals. One of our top SNPs, rs4500960, is in nearly perfect LD with the causal candidate rs2268894 (and is indeed the second most likely causal SNP in this region according to fgwas). The causal candidate rs6882046 is within 75kb of two lead SNPs on chromosome 5 (rs324886 and rs10061788), but no two of these three SNPs show strong LD. Interestingly, the remaining 6 causal candidates lie in genomic regions that only attain the equivalent of genome-wide significance upon Bayesian reweighting. Of the 17 causal candidates, 9 lie in regions that are DNase I hypersensitive in the fetal brain.

#### 4.2.7 *Conditional Analysis of Correlated Annotations*

In 4.2.5, we reported an analysis that controls for correlations across a number of different annotations. Specifically, we used forward selection and cross-validation to select multiple annotations to be included in a combined model. The results, displayed in Extended Data Fig. 7b, are consistent with our conclusion that the annotation DNASE (FETAL BRAIN) is an



important predictor of whether a SNP is significantly associated with *EduYears* in our meta-analysis.

Here, we report an additional analysis to probe the robustness of our conclusions. The goal of this analysis is to test to what extent each annotation included in our combined model is robust to controlling for other annotations, including other annotations that may be correlated with it.

Following ref. 1, for each annotation included in the combined model in Extended Data Fig. 7b (hereafter, called the “annotation of interest”), we tested whether adding that annotation to a model that controls for another annotation (hereafter, called the “other annotation”) significantly improves the fit of the model. Specifically, for each annotation of interest, we (i) estimated a model replacing the annotation of interest with the other annotation; (ii) fixing the coefficient of the other annotation, we added the annotation of interest back to the model and estimated its coefficient; and (iii) we examined whether the improvement in the model’s likelihood was statistically significant (i.e.,  $P < 0.05$ ). For every annotation of interest, we repeated this procedure using as the other annotation each of the (other) 50 most significant annotations from the one-annotation-only analysis that were not included in the combined model. By examining *which* other annotations eliminate the statistical significance of the annotation of interest, we can assess whether particular confounds might be driving the presence of DNASE (FETAL BRAIN) in the combined model.

The results of this robustness check are shown in Supplementary Table 4.2.3. In summarizing these results, we concentrate on the two instances (i.e., experimental replicates) of DNASE (FETAL BRAIN) as the annotations of interest, since their importance is the primary result of this analysis.

Here we list the “other annotations” that eliminate the statistical significance of DNASE (FETAL BRAIN). To be more precise, the “other annotations” such that adding one of the instances of the DNASE (FETAL BRAIN) did not generate a significant improvement in model fit ( $P > 0.05$ ) were:

- Another instance of DNASE (FETAL BRAIN). This finding is unsurprising since different instances of DNASE (FETAL BRAIN) are highly correlated with each other. It also does not bear on the question of whether DNase I hypersensitivity in the fetal brain is confounded by a different genomic feature.
- One of the several annotations related to transcription in embryonic stem cells. In this case, DNASE (FETAL BRAIN) only barely becomes insignificant ( $P < 0.06$ ), so it does not appear that these annotations drive our finding about DNASE (FETAL BRAIN).
- One experimental replicate of DNASE (FETAL MUSCLE). In this case also, DNASE (FETAL BRAIN) only barely becomes insignificant ( $P = 0.07$ ). We conclude that DNASE (FETAL MUSCLE) does not seem to drive our finding about DNASE (FETAL BRAIN).
- Experimental replicates of DNASE (FETAL LUNG). In these cases, the  $P$ -value of DNASE (FETAL BRAIN) gets as large as 0.13. Thus, from a statistical perspective, DNASE (FETAL LUNG) is the strongest candidate for a confounder, although it is not obvious to us how to interpret it biologically. In any case the lung is a rather heterogeneous tissue where DNase I hypersensitivity has previously been found to predict association with height<sup>1</sup>, another perhaps unlikely phenotype.

- One of several annotations related to DNase I hypersensitivity in neural progenitor cells. These annotations implicate early brain development just as DNASE (FETAL BRAIN) does. Therefore, while this finding raises the question of which of these correlated annotations is responsible for the signal we observe, it does not call into question the substantive conclusion from this analysis that early brain development is implicated.

We interpret these results taken altogether as broadly supporting the robustness of our conclusion: DNase I hypersensitivity in the fetal brain (or in progenitors of brain cells) is an important predictor of whether a SNP is associated with *EduYears*, although it is conceivable that the finding is instead driven by DNASE (FETAL LUNG).

#### 4.2.8 Analysis of the Roadmap Epigenomics data

To confirm the enrichment of regions annotated as related to gene regulation in the brain, we turned to a separate set of annotations based on data from the Roadmap Epigenomics Consortium<sup>7</sup>.

The annotations are based on genome segmentations in 127 cell lines/types from <https://sites.google.com/site/anshulkundaje/projects/epigenomeroadmap>. In these segmentations, each region of the genome in each cell line/type falls into one of 15 categories according to the pattern of histone marks in the region. We labeled each SNP in the 1000 Genomes Project with any of the 1,905 annotations, defined by cell lines/types and pattern of histone marks, for which it qualified. We additionally included SYNONYMOUS and NONSYNONYMOUS as annotations. (*Synonymous* SNPs are single-nucleotide polymorphic sites within protein-coding genes that do not affect the composition of the protein as a result of redundancy in the mapping of DNA triplets to amino acids.) This dataset lacks an annotation referring directly to a positive result from an experimental assay of DNase I hypersensitivity in the brain. It does contain excellent proxies for this annotation such as the brain-specific extent of transcription and whether a region is a brain-specific enhancer; a frequent cause of DNase I hypersensitivity is the regulatory exposure of transcription start sites and enhancers to the machinery of gene expression. We then performed the same analyses as in our treatment of the earlier dataset, except using this set of 1,907 annotations instead of the previous set of 450.

All 530 statistically significant ( $P < 0.05$ ) annotations are given in Supplemental Table 4.2.4. Again, the most significant annotations refer to cell lines/types that are neural in nature. In particular, the four most significant annotations that improve the odds of association with *EduYears* are WEAK TRANSCRIPTION (FETAL BRAIN FEMALE) (6.27-fold increase in odds of association; 95% confidence interval 3.43–11.25), WEAK TRANSCRIPTION (FETAL BRAIN MALE) (6.05-fold increase in odds of association; 95% confidence interval 3.35–10.75), ENHANCERS (FETAL BRAIN MALE) (10.74-fold increase in odds of association; 95% confidence interval 5.49–19.22), and WEAK TRANSCRIPTION (BRAIN DORSOLATERAL PREFRONTAL CORTEX) (4.67-fold increase in odds of association; 95% confidence interval 2.67–8.02). We also replicated the observation that genomic regions annotated as transcriptionally repressed (QUIESCENT/LOW) are depleted of SNPs associated with *EduYears*.

## References

1. Pickrell, J. K. Joint analysis of functional genomic data and genome-wide association studies of 18 human traits. *Am. J. Hum. Genet.* **94**, 559–573 (2014).
2. Maurano, M. T. *et al.* Systematic localization of common disease-associated variation in regulatory DNA. *Science* **337**, 1190–1195 (2012).
3. Thurman, R. E. *et al.* The accessible chromatin landscape of the human genome. *Nature*, **489**, 75–82 (2012).
4. Hoffman M. M. *et al.* Integrative annotation of chromatin elements from ENCODE data. *Nucleic Acids Res.* **41**, 827–841 (2013).
5. Beriza, T. & Pickrell, J. K. Approximately independent linkage disequilibrium blocks in human populations. *bioRxiv* (Cold Spring Harbor Labs Journals, 2015). <http://dx.doi.org/10.1101/020255>
6. Maller, J. B. *et al.* Bayesian refinement of association signals for 14 loci in 3 diseases. *Nat. Genet.* **44**, 1294–1301 (2012).
7. Roadmap Epigenomics Consortium *et al.* Integrative analysis of 111 reference human epigenomes. *Nature* **518**, 317–339 (2015).

### 4.3 Functional Partition of Heritability with GREML

#### 4.3.1 Overview

By applying genetic-relatedness-matrix REML to pooled data from the Health and Retirement Study, the Rotterdam Study, and the Swedish Twin Registry, we partitioned the SNP-based heritability of *EduYears* between (1) coding and non-coding regions of the genome and (2) regions of the genome that are DNase I hypersensitive regions in different cell types. Partitioned heritability estimates indicated that *EduYears*-associated SNPs enrich nonsynonymous sites and regions that are DNase I hypersensitive in both blood cells and the brain. Only the enrichment of regions that are DNase I hypersensitive in blood, however, was statistically significant. A likely explanation for the typical failure of enrichment to reach significance is that available SNPs in our analysis poorly represent nonsynonymous sites and DNase I hypersensitive regions and thus lead to biased heritability estimates.

#### 4.3.2 Background

Explanations of genomic-relatedness-matrix restricted maximum likelihood (GREML), at various levels of formality, have been given in previous publications<sup>1–4</sup>. We followed the method developed by ref. 5 and estimated the extent to which the heritable variance of *EduYears* enriches coding SNPs and also SNPs residing in regions that are DNase I hypersensitive in particular cell types. Partitioning heritability in this way can help to elucidate the biological mechanisms through which genetic variation affects the phenotype of interest.

### 4.3.3 Data and Methods

The investigators of the Rotterdam Study (RS) I and II genotyped their samples with the Illumina-550K chip; RS III, the Illumina-610K-Quad; the Swedish Twin Registry (STR), the HumanOmniExpress-12v1-A; and the Health and Retirement Study (HRS), the Illumina-Omni2.5-Beadchip. In all cohorts, the worldwide 1000 Genomes (1000G) phase I reference sample was used for imputation.

From the 1000G SNPs we selected the subset of available autosomal HapMap3 SNPs with an imputation  $r^2$  above 70%. We rounded the dosages to best-guess genotypes. In each cohort we performed quality control (QC) on the best-guess genotypes, excluding all SNPs meeting any of the following criteria:  $MAF < 0.01$ , Hardy-Weinberg equilibrium  $P < 0.01$ , and missingness greater than 0.05. We also excluded individuals missing more than 5 percent of their calls. After QC we merged the five cohorts. This procedure yielded a merged dataset consisting of 1,062,589 SNPs available in all cohorts. The total number of individuals in the merged set was 29,765.

In each cohort we corrected *EduYears* for age, squared age, and gender. The resulting residuals were standardized within cohort. In the merged dataset we selected individuals with non-missing measurements of the control and outcome variables. In addition, from each twinship in the pooled data, we selected at most one twin. The sample size remaining after these steps was 26,180.

We applied a second round of QC to the merged data, with the same thresholds applied at the cohort level. This led to 1,052,745 SNPs. To this final set of markers and individuals, we applied GCTA to construct the genetic-relatedness-matrix (GRM) and calculate its eigendecomposition. From this decomposition we retained the first 20 principal components. Finally, we included cohort dummies as additional controls. Pairs of individuals with a genetic relatedness greater than 0.025 were excluded. This relatedness cutoff led to a final sample of 20,450 individuals.

In the taxonomy of ref. 5, SNPs are assigned to six different categories (i.e., nonsynonymous, UTR, promoter, DNase I hypersensitive regions, intronic, and intergenic). We adopted the data sources of ref. 5 but for simplicity collapsed all SNPs in the five noncoding categories. This classification yielded 16,565 coding and 1,036,180 noncoding SNPs. For each of the two categories, we constructed a GRM. In essence, we modeled the matrix of phenotypic products as a linear combination of GRMs. The variance component weighting each GRM corresponds to the SNP-based additive genetic variance attributable to the particular class of SNPs (e.g., coding).

We carried out another partitioning analysis by constructing three (partially overlapping) subsets, containing SNPs located in regions that are DNase I hypersensitive in blood cells, brain cells, and other cell types respectively. For each subset we constructed a GRM based on the SNPs in the subset, a GRM based on SNPs located in regions that are DNase I hypersensitive region in some cells but not in the cell type under consideration, and a GRM based on SNPs outside any region ever observed to be DNase I hypersensitive. We subsequently used GREML with three variance components to estimate the respective contributions to heritability made by three types of SNPs.

We note that the GREML procedure we employ can produce biased estimates if the SNPs with nonzero partial regression coefficients are not representative of the entire category with

respect to LD, but the magnitude of any such bias is likely to be small and in any case lead to underestimates of univariate quantities<sup>4,6</sup>. Bivariate quantities are not likely to be affected.

#### 4.3.4 Partitioned Heritability Results

Supplementary Table 4.3.1 shows the results of our GREML partitions. Turning first to the partition between coding and non-coding SNPs, one can see that noncoding SNPs explain the bulk of the genetic variation. This is not surprising since coding SNPs are outnumbered by a factor of ~60. The enrichment statistic—defined as the proportion of heritability captured by a set of SNPs divided by the proportion of SNPs in that set—suggests that coding SNPs are enriched by ~3-fold; however, using a likelihood-ratio test, we found that this statistic is not significantly greater than one.

Similarly, in our partitions between SNPs in regions that are DNase I hypersensitive in a particular cell type and other SNPs, there appears to be enrichment of regions that are DNase I hypersensitive regions in blood and the brain, but only the ~2-fold enrichment of blood is statistically significant.

The lack of statistical significance is likely to be driven by the poor representation of causal SNPs in enriched regions by our subset of HapMap3 SNPs. In more detail, we must consider that the SNP-based heritability captured by genotyping chips is already near the asymptote once the number of SNPs is about 400K<sup>1,7</sup>, which is a small subset of the roughly 8 million SNPs in European populations where both alleles are common. Therefore, when attempting to partition a fixed SNP-based heritability with a reduced subset of all common SNPs, the true heritability contributed by a SNP that bears a particular annotation but is missing from the panel must be captured by other SNPs in LD, and these proxy SNPs will often fall in other functional categories; this will tend to reduce the estimated heritability accounted for by SNPs in enriched regions (and to increase the estimated heritability accounted for by SNPs in impoverished regions). For instance, the very numerous classes of SNPs that are *not* DNase I hypersensitive in the brain will appear to capture more of the fixed SNP-based heritability than these classes actually contribute, because many of their SNPs tag DNase I hypersensitive regions that are not well represented in the panel. Ref. 5 noted that DNase I hypersensitive regions are especially prone to a misallocation of their SNP-based heritability to other regions when panels of SNPs smaller than 1000G are used.

Rather than attempting to remedy this limitation, we turned to stratified LD Score regression, a novel method for partitioning heritability that is not constrained in this manner. Stratified LD Score regression is the subject of the next subsection.

#### References

1. Yang, J. *et al.* Common SNPs explain a large proportion of the heritability for human height. *Nat. Genet.* **42**, 565–569 (2010).
2. Visscher, P. M., Yang, J. & Goddard, M. G. A commentary on ‘Common SNPs explain a large proportion of the heritability for human height.’ *Twin Res. Hum. Genet.* **13**, 517–524 (2010).
3. Rietveld, C. A. *et al.* Molecular genetics and subjective well-being. *Proc. Natl. Acad. Sci. USA* **110**, 96962–9697 (2013).

4. Lee, J. J. & Chow, C. C. Conditions for the validity of SNP-based heritability estimation. *Hum. Genet.* **133**, 1011–1022 (2014).
5. Gusev, A. *et al.* Partitioning heritability of regulatory and cell-type-specific variants across 11 common disease. *Am. J. Hum. Genet.* **95**, 535–552 (2014).
6. Speed, D. *et al.* Improved heritability estimation from genome-wide SNPs. *Am. J. Hum. Genet.* **91**, 1011–1021 (2012).
7. Vattikuti, S., Guo, J. & Chow, C. C. Heritability and genetic correlations explained by common SNPs for metabolic syndrome traits. *PLoS Genet.* **8**, e1002637 (2012).

## 4.4 Functional Partition of Heritability Using Stratified LD Score Regression

### 4.4.1 Overview

By performing multiple regression of GWAS association chi-square statistics on stratified LD Scores, each corresponding to how well the focal SNP tags other SNPs within a functional category (e.g., nonsynonymous, DNase I hypersensitive region), we can estimate the percentage of the trait’s total SNP-based heritability ascribable to SNPs residing in each category. Application of this method to our GWAS of *EduYears* leads to results that in some ways are similar to those obtained from analyses of other phenotypes; for instance, we find that regions of the genome that are evolutionarily conserved in mammals account for a disproportionate share of heritable variance, whereas regions that are transcriptionally repressed are depleted of contributions to heritability. In line with some other previously analyzed phenotypes but not others, *EduYears* owes an enriched share of its heritability to regions associated with histones that are marked specifically in cell types constituting the central nervous system.

### 4.4.2 Background

Stratified LD Score regression is based on the relationship

$$E[\chi_j^2] = N \sum_c^c \tau_c \ell(j, c) + Na + 1,$$

where  $\chi_j^2 = N\hat{\beta}_j^2$  is the GWAS chi-square statistic for SNP  $j$ ,  $N$  is the sample size,  $c$  indexes the functional categories (which do not have to be disjoint),  $\ell(j, c)$  is the stratified LD Score of SNP  $j$  with respect to functional category  $c$ ,  $\tau_c$  is the average contribution to heritability of a SNP due to its membership in category  $c$ , and  $a$  is a term that measures the contribution of confounding biases such as cryptic relatedness and population stratification. A derivation of this equation is given by ref. 1. To be clear,

$$\ell(j, c) := \sum_{k \in \mathcal{C}_c} r_{jk}^2,$$

where  $\mathcal{C}_c$  denotes the set of SNPs in the  $c$ th functional category ( $c = 1, \dots, C$ ). Thus, the stratified LD Score of SNP  $j$  with respect to category  $c$  is the sum of  $j$ 's linkage disequilibrium (LD) measures with respect to all SNPs in category  $c$ . In the case that the functional categories are disjoint, the sum of SNP  $j$ 's stratified LD Scores is equal to its total LD Score (Supplementary Information section 2.3). In stratified LD Score regression, however, the categories need not be disjoint. The case of SNPs belonging to more than one category is analogous to multiple regression with correlated predictor variables; Crow and Kimura<sup>2</sup> give an insightful description of the correlation between two variables in terms of discrete “elements” shared in common between them.

To estimate the heritability ascribable to various functional categories, the multiple regression of  $\chi_j^2$  on the  $\ell(j, c)$ 's implied by the above relationship is used to estimate the  $\tau_c$ 's; the squared coefficient of SNP  $j$  in the regression of the phenotype on the SNP is assumed to equal, on average,  $\text{Var}(\beta_j) = \sum_{c: j \in \mathcal{C}_c} \tau_c$  (i.e., it is assumed that the SNPs bearing the same functional annotations as SNP  $j$  have an average squared regression coefficient equal to the sum of the  $\tau_c$ 's over the categories to which these SNPs belong); and the heritability ascribable to functional category  $c$  is calculated as

$$h^2(\mathcal{C}_c) = \sum_{j \in \mathcal{C}_c} \text{Var}(\beta_j).$$

Enrichment is then calculated for each category as the fraction of the total heritability captured by the category divided by the fraction of SNPs in that category. The simulations reported in ref. 1 indicate that this method of assigning heritability to functional categories is superior to GREML because it renders a large number of categories computationally tractable. Another advantage is that can be applied to meta-analysis summary statistics without requiring individual-level data.

Note that, as ref. 1 mentions, this method of partitioning heritability works even when Genomic Control (GC) has been applied to the summary statistics of some cohorts in the meta-analysis, even though the GC correction makes it impossible to estimate the heritability for any specific category or the total heritability. As ref. 1 puts it, “[t]his is because GC correction introduces a multiplicative error into estimates of both  $h^2(\mathcal{C}_c)$  and  $h^2$ , but the two multiplicative errors are equal, and cancel out in the ratio.”

To partition the SNP-based heritability of *EduYears* with our GWAS meta-analysis results, we followed exactly the same procedure described in ref. 1. We used the stratified LD Scores calculated from the European-ancestry samples in the 1000 Genomes Project (1000G), but in the regressions themselves took forward only the *EduYears* chi-square statistics of the ~1.1 million HapMap3 SNPs with minor allele frequency (MAF) > 0.05; the LD Scores of SNPs with low MAFs introduce a great deal of sampling variation. The predictor variables in the “baseline” model consisted of one category consisting of all SNPs, 24 main annotations, 500bp windows around regions qualifying for each of these 24 annotations, and 100bp windows around ChIP-seq peaks (regions that are DNase hypersensitive or associated with histones bearing the marks H3K4me1, H3K4me3, or H3K9ac). There were thus 53 predictor

variables in total. The windows encompassing regions of interest were included to prevent SNPs bearing a particular annotation from capturing heritability due to neighboring sites.

It is worth pointing out that, unlike GREML, stratified LD Score regression does not suffer from the misallocation of heritability described in Supplementary Information section 4.3. Under the model, all that is needed for the accuracy of a heritability partition is the accurate estimation of the  $\tau_c$ 's; this is ensured by the standard identification condition in least-squares regression, which in our case requires that the residual terms in the regression model be uncorrelated with the stratified LD Scores. The results reported in ref. 3—in particular the finding of close-to-zero correlations between total LD Scores and  $F_{st}$  (a measure of genetic differentiation among subpopulations) at various geographical scales—bears out the plausibility of this condition. Furthermore, since the stratified LD Scores themselves are calculated from essentially all 1000G SNPs where both alleles are common in Europeans (a superset of the SNPs employed in the regression), the variables on the right-hand side of the LD Score regression equation are accurately quantified for the purpose of partitioning the genetic variance caused or tagged by SNPs where both alleles are common.

It is of interest to determine the heritability contributed by SNPs located in regions that are especially likely to regulate gene expression in cells of a certain type (e.g., cartilage progenitors, liver, adipose nuclei, pancreatic islets, frontal lobe, angular gyrus). Gene expression is often facilitated or repressed as a result of mechanisms triggered by *histone* or *chromatin marks*: posttranslational modifications of histones that alter their interaction with the DNA wound around them. There are a number of annotations referring to histone marks in the baseline model, but the SNPs in each corresponding category are a union of SNPs located in regions associated with the defining mark in any cell type. To gain tissue-level resolution, we followed the analysis of ref. 1 by grouping 220 distinct types of histone marks—defined by both mark and cell type—into 10 broad tissue types (ADRENAL/PANCREAS, CENTRAL NERVOUS SYSTEM, CARDIOVASCULAR, CONNECTIVE/BONE, GASTROINTESTINAL, IMMUNE/HEMATOPOIETIC, KIDNEY, LIVER, SKELETAL MUSCLE, and OTHER). We then added each of these 10 tissue annotations to the baseline model, one at a time, and assessed the magnitude and statistical significance of the enrichment thus observed. To benchmark these results, we downloaded the summary statistics of three recent GWAS meta-analyses of height<sup>4</sup>, body mass index (BMI)<sup>5</sup>, and waist-to-hip ratio adjusted for BMI (WHR)<sup>6</sup> (<http://www.broadinstitute.org/collaboration/giant/index.php>) and applied the tissue-level analysis to these phenotypes. The sample sizes employed in these three meta-analyses are similar to our own and therefore enable an informative comparison.

#### 4.4.3 Results

Supplementary Table 4.4.1 gives the results from estimating the parameters of the baseline model. For now we focus on the enrichment statistics. To correct for multiple hypothesis testing, we adjusted the significance threshold with a Bonferroni correction for 62 two-sided tests of 52 annotations in the baseline model and 10 tissue types; the resulting significance threshold is  $P < 0.05/62 = 8.1 \times 10^{-4}$ . It can be seen that 10 baseline annotations met this threshold. Indeed, 23 annotations met the conventional threshold  $P < 0.05$ , more than 7 times as many as expected if the enrichment statistics of the baseline annotations are all null.

The functional category exhibiting the most quantitatively substantial and statistically significant enrichment corresponds to regions that are evolutionarily conserved in mammals (~15-fold). *Evolutionarily conserved* regions of the genome accumulate base-pair



substitutions differentiating distinct species more slowly than predicted by a model of selective neutrality, which implies that mutations in such regions tend to have phenotypic effects that are visible to natural selection. The enrichment of evolutionarily conserved regions by the SNP-based heritability of *EduYears* is in line with a strong trend observed in previous applications of stratified LD Score regression to 16 other phenotypes<sup>1</sup>. Also consistent with these previous applications is the depletion of heritability from regions that are predicted to be transcriptionally repressed (~0.9-fold).

The functional category showing the strongest enrichment after evolutionarily conserved regions corresponds to regions associated with the histone mark H3K9ac (~5.6-fold). The nomenclature used to classify histone marks indicates the precise nature of a given modification. In this case, the particular type of histone is H3, the type of the modified amino acid is lysine (which has the abbreviation K), the position of the modified amino acid within the protein is 9, and the modification undergone is acetylation. The acetylation of lysine acts to reduce the electrical attraction between DNA and the histone residue, which may facilitate the expression of genes embedded in the DNA through a number of mechanisms. Indeed, a common theme of the significant annotations is residence upstream of protein-coding genes and likely regulation of their expression (TRANSCRIPTION START SITE, FANTOM5 ENHANCER, 5-PRIME UTR, FETAL DNASE I HYPERSENSITIVE, WEAK ENHANCER).

We found that nonsynonymous SNPs account for roughly 3.5 times as much variance as expected from the sheer number of SNPs alone, but this enrichment was not statistically significant ( $P = 0.158$ ). The average phenotype analyzed in ref. 1 was found to exhibit more than 7-fold enrichment of nonsynonymous SNPs. Although our current estimation precision does not allow us to rule out enrichment of this magnitude, we can at least say that the genetic architecture of *EduYears* does not stand out as particularly enriched by nonsynonymous sites.

We confirmed that *EduYears*-associated SNPs enrich regions that are DNase I hypersensitive in fetal tissue (Supplementary Table 4.4.1), although the annotation in this analysis refers to the union of regions that are DNase I hypersensitive in any fetal tissue (as opposed to just the brain). It should be pointed out that the point estimate of 2.361 is only marginally significant. The enrichment factor is slightly smaller when we consider the superset of SNPs including all those lying either directly in a region found to be DNase I hypersensitive in fetal tissue or within 500bp of such a region, but this factor is very highly significant because of the greater number of SNPs qualifying for these extended regions and hence smaller standard error ( $P = 2.3 \times 10^{-6}$ ). If we take the point estimates at face value, they suggest that SNPs lying very close to a peak of assayed DNase I hypersensitivity are only somewhat less enriched by *EduYears* heritable variance than SNPs lying directly within such a peak.

Extended Data Fig. 8a and Supplementary Table 4.4.2 display the results of the tissue-level analysis. It is the enrichment of the central nervous system that is strongest and most statistically significant when the phenotype is *EduYears* (~3-fold). When all four traits are considered simultaneously, a striking trend becomes evident. Every bar graph in Extended Data Fig. 8a corresponding to a tissue type, with one exception, resembles a flight of stairs ascending from left to right; these tissues are more enriched by WHR and height than by *EduYears* and BMI. The one exception is the central nervous system, the bar graph of which resembles a flight of stairs descending from left to right as a result of this tissue type being most enriched by *EduYears*. The fact that it is BMI whose enrichment profile most closely

resembles that of *EduYears* is explicable in light of the nontrivial magnitude of the genetic correlation between these two traits (Fig. 2 and Supplementary Table 3.1).

Most of the enrichments in Extended Data Fig. 8a are greater than one because we did not carry out a true partition. Many SNPs are associated with histone marks observed in multiple tissues, and thus the addition of each tissue type to the baseline model one at a time can lead to the positive enrichment of all types. It is thus of interest to examine the  $\tau_c$  of each tissue, which corresponds to the expected change in the square of a SNP's GWAS marginal regression coefficient (the regression being on the standardized genotype) for each unit change in the SNP's tissue-specific stratified LD Score. Since each  $\tau_c$  is a partial regression coefficient in the stratified LD Score regression model, the just-described change reflects statistical control of the 52 variables in the baseline model. The  $\tau_c$ 's are given in the final column of Supplementary Table 4.4.2. In contrast to the enrichments, which all deviate from one in the positive direction, the signs of the  $\tau_c$ 's are both positive and negative. For instance, when the phenotype is *EduYears*, the only positive estimated  $\tau_c$ 's belong to CENTRAL NERVOUS SYSTEM ( $34.27 \times 10^{-9}$ ), ADRENAL/PANCREAS ( $14.16 \times 10^{-9}$ ), and IMMUNE/HEMATOPOIETIC ( $3.49 \times 10^{-9}$ ). When the phenotype is height, we see a markedly different pattern; now all estimated  $\tau_c$ 's are positive with one exception, which is CENTRAL NERVOUS SYSTEM ( $-56.47 \times 10^{-9}$ ).

We offer the following interpretation of the  $\tau_c$ 's for the sake of concreteness, although it should be kept in mind that the validity of the interpretation depends on the quality of the baseline annotations as statistical controls and the structural assumptions of LD Score regression (e.g., the absence of any relationship between MAF and contributed heritability). Suppose that we have two SNPs that are identical in all respects *except* for the tissues where their associated histones are marked; for instance, they may be both noncoding, both located in an evolutionarily conserved region, both more than 500bp from a region that is DNase I hypersensitive in fetal tissue, and so forth. Also suppose that they both tag no other SNPs (total LD Score = 1); this means that each SNP's GWAS regression coefficient ( $\beta_j$ ) is in fact proportional to its average effect of gene substitution ("true" causal effect)<sup>7,8</sup>. If the SNP-based heritability of *EduYears* is 0.20 (the estimate reported by ref. 9), then each of the ~10 million SNPs where both alleles are common in Europeans makes an average contribution to this heritability of  $2 \times 10^{-8}$ .

Each squared average effect of gene substitution is equal to a linear combination of the  $\tau_c$ 's, where the weights are indicators of the annotations. Suppose that the baseline annotations of our two matched SNPs are indicative of phenotypic impact and thus predict twice the typical squared average effect. If one SNP's histone is marked only in the central nervous system while the other SNP's histone is marked only in gastrointestinal tissue ( $\tau_{GI} = -23.44 \times 10^{-9}$ ), then the squared average effects of the two SNPs are predicted to equal  $\sim 7.4 \times 10^{-8}$  and  $1.7 \times 10^{-8}$  respectively. The SNP located in a stretch of DNA wound around a histone modified only in the central nervous system thus accounts for more nearly 4.5 times as much *EduYears* variance as a matched SNP whose histone is modified only in the digestive system.

To put this example in perspective, suppose now that we switch the phenotype from *EduYears* to height, where we have  $\tau_{GI} = 46.97 \times 10^{-9}$ . Starting with a SNP-based heritability of height equal to 0.50 (the GREML estimate reported by ref. 4), we can repeat the exercise above and find that a SNP associated with a histone modified only in the digestive system accounts for nearly 3.5 times as much variance as that of a matched SNP modified only in the central nervous system. If we use connective/bone in the place of gastrointestinal tissue in our

exercise ( $\tau_{C/B} = 223.19 \times 10^{-9}$ ), we find that a SNP associated with a histone modified only in connective/bone tissue accounts for nearly 7.5 times as much height variance as a matched SNP whose tissue-level annotations refer only to the central nervous system.

## References

1. Finucane, H. K. *et al.* Partitioning heritability by functional category using GWAS summary statistics. *Nat. Genet.* **47**, 1228-1235.
2. Crow, J. F. & Kimura, M. *Introduction to Population Genetics Theory* (Harper and Row, 1970).
3. Bulik-Sullivan *et al.* LD Score regression distinguishes confounding from polygenicity in genome-wide association studies. *Nat. Genet.* **47**, 291–295 (2015).
4. Wood *et al.* Defining the role of common variation in the genomic and biological architecture of adult human height. *Nat. Genet.* **46**, 1173–1186 (2014).
5. Shungin *et al.* New genetic loci link adipose and insulin biology to body fat distribution. *Nature* **518**, 187–196 (2015).
6. Locke *et al.* Genetic studies of body mass index yield new insights for obesity biology. *Nature* **518**, 197–206 (2015).
7. Fisher, R. A. Average excess and average effect of a gene substitution. *Ann. Eugenics* **11**, 53–63 (1941).
8. Lee, J. J. & Chow, C. C. The causal meaning of Fisher’s average effect. *Genet. Res.* **95**, 89–109 (2013).
9. Rietveld, C. A. *et al.* GWAS of 126,559 individuals identifies genetic variants associated with educational attainment. *Science* **340**, 1467–1471 (2013).

## 4.5 Prioritization of Genes, Pathways, and Tissues/Cell Types with DEPICT

### 4.5.1 Overview

Here we describe Data-driven Expression Prioritized Integration for Complex Traits (DEPICT, [www.broadinstitute.org/depict](http://www.broadinstitute.org/depict))<sup>1</sup>, a tool that employs data from massive numbers of experiments measuring gene expression to (1) prioritize candidates for the genes whose products are altered or regulated by the DNA sites responsible for GWAS signals; (2) highlight biological pathways and sets of functionally related genes (henceforth “gene sets”) enriched by multiple GWAS signals; and (3) identify tissues and cell types where prioritized

genes are highly expressed. DEPICT has been described in previous publications, but here we aim to give a walk-through that is accessible to social scientists and neuroscientists.

As a brief preview of what we find, in our GWAS of *EduYears*, DEPICT returns robust nominations of gene sets pertaining to the central nervous system and neural tissues. More specifically, the gene sets matter for many of the stages of brain development following the induction of the head: the proliferation of neural progenitor cells, the differentiation of neurons from the progenitors, the migration of newly born neurons to the different layers of the cortex, the projection of axons from neurons to their signaling targets, the sprouting of dendrites and their spines to meet incoming axons, and neuronal signaling and synaptic plasticity throughout the lifespan.

#### **4.5.2 Background**

In the GWAS literature, the term *locus* has come to mean a stretch of the genome centered on a SNP showing the strongest evidence of association within a broader region. It is common for the locus centered on a lead SNP to contain several genes, and in such cases picking out the specific gene whose product is involved in the biology of the focal phenotype poses a serious challenge. Addressing this problem of prioritizing genes in a principled and comprehensive fashion is a primary motivation of DEPICT. Another application—which in fact turns out not depend on the correct nomination of individual genes—is to highlight sets of functionally related genes and tissues/cell types enriched by GWAS signals.

#### **4.5.3 Gene Function Prediction for Gene Set Reconstitution**

The initial input to DEPICT consists of results gathered from 77,840 microarray experiments across hundreds of studies, each measuring the expression levels of 19,997 genes (the number of genes covered by the Affymetrix platforms; see ref. 2 for details). Such an experiment measures the expression levels of all genes covered by the microarray platform, in order to study the effects of certain treatments, diseases, or developmental cues. Each of the 77,840 experiments thus reports the quantities of mRNA transcripts mapping to each of the 19,997 genes, in response to a certain set of conditions. One of the microarrays may have measured levels of gene expression in a certain cell type exposed to heat shock; another may have measured levels of gene expression in a certain cell type just after its initial differentiation from a progenitor cell type. The experiments were performed on different mammalian species: two of the platforms were designed for human, whereas one was designed for mouse and another for rat.

After appropriate renormalization, the gene-by-gene correlation matrix derived from the subset of microarray experiments performed with each species-specific platform was subjected to *principal components analysis* (PCA). PCA is a common technique for clustering similar experimental units according to their projections on continuous components (linear combinations of the attributes). For example, psychologists often use PCA to convert a test-by-examinee matrix of test scores into a test-by-component matrix of “loadings”; those tests with large loadings on the same components tend to show higher correlations with each other. The same principle applies to the work of Fehrmann *et al.*<sup>2</sup> used in DEPICT; the PCA leads to a gene-by-component matrix of loadings, and those genes with large loadings on the same components tend to show similar levels of expression across microarray experiments.

Cronbach's  $\alpha$  was used to determine the reliability of each component (henceforth "transcriptional component" or "TC"). This measure of reliability has historically been important in the theory and practice of psychological measurement<sup>3</sup>. The "total score" in this computation of Cronbach's  $\alpha$  is the loading-weighted sum of measured expression levels over all genes, and a given "item score" is the product of the loading and the expression level. A higher value indicates tighter co-expression of the genes with large loadings on the TC; that is, the expression levels of all genes with loadings on a highly reliable TC tend to rise or fall together across distinct experiments, implicating the products of these genes in shared biology. Applying a threshold of  $\alpha > 0.70$  to the reliability measures led to the retention of 777 and 377 TCs from the respective human platforms, 677 TCs from the mouse platform, and 375 TCs from the rat platform. The total number of TCs was thus 2,206.

At this point the DEPICT pipeline had a 19,997 $\times$ 2,206 matrix of loadings. Pers *et al.*<sup>1</sup> then adopted 14,461 predefined gene sets taken comprehensively from several bioinformatic databases, including Gene Ontology (GO, <http://amigo.geneontology.org/amigo>)<sup>4</sup>, the Kyoto Encyclopedia of Genes and Genomes (KEGG, <http://www.genome.jp/kegg/>)<sup>5</sup>, Reactome (<http://www.reactome.org/>)<sup>6</sup>, the Mouse Phenome Database within the Mouse Genome Informatics project (MP, <http://phenome.jax.org/>)<sup>7</sup>, and the InWeb database<sup>8</sup>. (An example of a gene set is all genes placed by the curators of GO in the category FOREBRAIN DEVELOPMENT. The MP database is relevant because most human genes have orthologs in mice as a result of common descent from a primordial mammalian ancestor.) For each gene set and TC, a *t*-test of the mean difference between the TC loadings of genes within the set and all other genes was calculated. A large mean difference indicates that the loadings of genes on the focal TC are informative with respect to membership in the predefined gene set. The result of this processing step was a 14,461 $\times$ 2,206 matrix of *t*-statistics.

An analogy to the use of PCA in differential psychology may be helpful. Whereas the first principal component (PC) extracted from a test-by-examinee matrix of scores typically corresponds to the general factor of cognitive performance (*g*), the second PC can often be interpreted as a "bipolar factor," on which tests measuring verbal ability have loadings of one sign and tests measuring spatial ability have loadings of the other sign. If the constructors of the test battery deliberately intended to measure spatial ability with some subset of the tests, they might perform a *t*-test of the mean difference in second-PC loadings between those tests putatively measuring spatial ability and all other tests. A large mean difference indicates that the second PC does indeed correspond in some way to the desired spatial factor. Note that in the context of DEPICT, the *P*-values yielded by the *t*-tests need not be interpreted in terms of Type 1 error. The *t*-statistics are simply a means of quantifying the correspondences that exist between *a priori* gene sets and TCs empirically derived from gene co-expression data.

The final step was the calculation of the correlation between the *i*th gene's TC loadings (the *i*th row of the gene-by-TC matrix) and the *j*th predefined gene set's *t*-statistics (the *j*th row of the gene set-by-TC matrix). To avoid circularity in cases where a particular gene was part of a predefined gene set, that gene was left out from the gene set, the gene set's *t*-statistic for each TC was recomputed, and the correlation between the gene's TC loadings and the gene set's *t*-statistics was calculated. The *P*-value corresponding to each correlation was converted to a *Z*-statistic, and the resulting 19,997 $\times$ 14,461 gene-by-gene-set matrix of *Z*-statistics was the final output of the pipeline. Because each entry of the gene-by-gene-set matrix is quantitative, a given entry will often represent the weight of evidence or the centrality of the gene to the set with more precision than the all-or-nothing *a priori* classifications. For this reason we call a given gene's row of *Z*-scores in the gene-by-gene-set matrix its memberships

in *reconstituted gene sets*. (Incidentally, the statistical significance of the correlation between a gene's TC loadings and a gene set's *t*-statistics is used by the web-based Gene Network tool to determine whether a GO, KEGG, or Reactome category should be returned to a user entering the gene as a search term. Recall that we used these search results to construct Supplementary Table 4.1.5. Ref. 9 describes how the significance threshold is chosen to satisfy  $FDR < 0.05$ .)

Returning to our analogy between DEPICT and a potentially parallel use in differential psychology, we can think of what it means for a newly designed test to have a high membership score with respect to a test battery originally purporting to measure spatial ability. The new test must have *high* loadings on PCs that strongly differentiate the original spatial tests from other tests and *low* loadings on PCs that do not make this discrimination. Suppose that there is another PC of smaller eigenvalue, on which tests of perceptual speed have high loadings (while the original spatial tests have inconsistent or uniformly low loadings). Then the new test—*despite* a high loading on the spatial PC—cannot have a high membership score if it also has a loading of large absolute value on the perceptual PC. In light of the small residual correlations remaining between the original tests measuring spatial ability and perceptual speed after the outer products of the higher PCs have been removed from the correlation matrix, the new test is too strongly correlated with the tests of perceptual speed to qualify as a good member of a reconstituted spatial battery. Similarly, in order for a gene to be a strong member of a reconstituted gene set (e.g., the GO category FOREBRAIN DEVELOPMENT), it must not only be co-expressed with genes that are heavily weighted in those linear combinations of microarray measurements successfully distinguishing FOREBRAIN DEVELOPMENT genes from others, but also *fail* to exhibit residual co-expression with genes that are heavily weighted in other combinations.

If a gene is a highly ranked member of a gene set to which it does not nominally belong, we have evidence of “hidden biology”: a participation of the gene's product in a particular biological pathway—or a localization of the product in a particular cell component or tissue type—that was not previously recognized. Because a high rank must derive from a correlation between loadings of genes and *t*-statistics of gene sets across thousands of TCs, this approach to uncovering such hidden biology takes advantage of co-expression patterns that can be extremely subtle.

To summarize, a reconstituted gene set is initially seeded by a category found in one of the databases cited earlier. Co-expression of genes across many thousands of microarray experiments is the basis for replacing binary membership scores on the part of genes with quantitative weights. By boosting the membership scores of some genes from zero to a positive value, this latter step effectively brings many genes into the gene set with the following property: they were not included in the original set by the scientists curating the database of origin, but nevertheless share subtle patterns of co-expression with many of the seed members. Pers *et al.* have shown that gene sets known to be biologically relevant to the phenotype are much more likely to be prioritized when they are reconstituted and employed by DEPICT than when the original sets are employed by other GWAS enrichment-analysis tools<sup>1</sup>. (Interestingly, the performance of these other tools can be improved by supplying the reconstituted gene sets as input in place of the original sets.) The reconstituted gene sets are the basis for our nomination of genes and gene sets, applications to which we now turn.

#### 4.5.4 Gene Prioritization

Any particular locus centered on a SNP may contain multiple genes. By exploiting the fact that genes involved in a particular phenotype tend to be co-expressed and share similar annotations in bioinformatic databases, DEPICT can nominate a gene whose product is likely to be altered or regulated by the causal site in the locus. At a given locus where a gene must be nominated, DEPICT calculates the average correlation between each gene's vector of memberships in reconstituted gene sets and the corresponding vectors of genes lying in all  $n-1$  other significant GWAS loci. Each of these correlations is converted to a  $Z$ -statistic, and a gene with a high  $Z$ -statistic may then be nominated as the mediator of the SNP's phenotypic effect. The empirical mean and standard deviation of the  $Z$ -statistic under the null hypothesis is obtained by drawing a random set of  $n-1$  loci (each centered on a SNP reaching the chosen significance threshold in one of 200 simulated GWAS of a non-heritable phenotype and constrained to match its corresponding actual GWAS locus in gene density), recalculating the focal gene's  $Z$ -statistic with the reconstituted memberships of the genes in the matched loci, and repeating this whole process until 500  $Z$ -statistics are in hand. The gene's prioritization  $P$ -value is derived from its actual  $Z$ -statistic after this has been adjusted in light of its empirical mean and standard deviation under the null hypothesis. The FDR associated with a given gene's  $P$ -value is obtained by dividing the number of times the  $P$ -value is exceeded in simulated GWAS of non-heritable phenotypes by the DEPICT-determined rank of the gene in the actual GWAS results and normalizing by the number of simulations.

#### 4.5.5 Reconstituted Gene Set Prioritization

It is also valuable to prioritize a subset of the reconstituted gene sets themselves, since the sets often correspond to entire biological pathways and cell components that may be better characterized as a whole than many individual genes. For each reconstituted gene set, DEPICT sums the  $Z$ -statistics in its column of the gene-by-gene-set matrix corresponding to genes contained in the  $n$  GWAS loci and then tests the significance of the resulting enrichment statistic by repeatedly sampling random sets of  $n$  loci (matched to the actual GWAS loci by gene density) from the entire genome to estimate the empirical mean and standard deviation of the enrichment statistic's null distribution. These estimates are used to calculate a  $P$ -value. Simulated GWAS of randomly generated non-heritable phenotypes are used to estimate the FDR associated with any given  $P$ -value threshold for declaring that the genes within a set enrich the loci centered on high-ranking SNPs in the actual GWAS results.

Simulations have shown the  $P$ -values returned by DEPICT's procedures for prioritizing reconstituted gene sets and individual genes are uniformly distributed when the phenotype is non-heritable<sup>1</sup>. In non-null cases matching by gene density may actually be a conservative procedure; see Supplementary Information section 4.6 for discussion.

The application of DEPICT to a GWAS meta-analysis with as large a sample size as ours can be expected to return a long list of reconstituted gene sets, and many pairs of these sets will have vectors of membership scores that are positively correlated. To clarify the interpretation of the results, it is therefore useful to partition the significant reconstituted gene sets into clusters. For this purpose DEPICT employs the Affinity Propagation algorithm<sup>10</sup>, which also selects an exemplar for each cluster. Reconstituted gene sets that are members of the same cluster tend to be more highly correlated with each other than with members of other clusters. In our judgment the exemplary reconstituted gene set giving its name to the cluster typically better represents the cluster as a whole than the member gene set with the lowest enrichment  $P$ -value.

#### 4.5.6 Tissue/Cell Type Prioritization

DEPICT determines whether the genes overlapping GWAS loci are expressed more highly in a particular tissue or cell type than other genes, on average, by employing a gene-by-tissue matrix that is conceptually similar to the gene-by-gene-set matrix.

We downloaded normalized RNA-Seq gene expression data from the GTEx project<sup>11</sup> (pilot release, 01/31/2013, patch 1). We further processed the RNA-Seq data by winsorizing values larger than 50 reads per kilobase of transcript per million reads mapped (RPKM) to 50 (as previously done in ref. 12) and transforming all values to  $\log_2(1+RPKM)$  values. (The RPKM unit thus corresponds to the relative abundance of sequenced RNA transcripts mapped to the given gene.) After discarding genes either not covered by DEPICT or showing no variance across tissues, we ended up with 19,414 genes. We discarded tissues with fewer than 10 samples and computed the median expression level of each gene in each of the remaining 37 tissues. We used the resulting 19,414×37 gene-by-tissue matrix of normalized scores in the place of the matrix derived from microarray samples accompanying the standard version of DEPICT<sup>1</sup>.

The algorithm for identifying columns of the matrix (tissues or cell types) that are significantly enriched by the expression of genes overlapping *EduYears*-associated loci is conceptually identical to the one used to prioritize reconstituted gene sets.

#### 4.5.7 Parameters Used in DEPICT

Scripts from GitHub were used to run all analyses (<https://github.com/DEPICTdevelopers>; the version at 139 commits). We included as input all SNPs reaching the DEPICT default  $P < 1 \times 10^{-5}$  in the GWAS meta-analysis of *EduYears*. Many of our analyses suggest that SNPs attaining this significance threshold are unlikely to be false positives due wholly to residual stratification (Extended Data Fig. 3). DEPICT was run with the default settings:

1. independently associated SNPs were defined as those showing LD to the extent  $r^2 < 0.1$  and located more than 500kb apart;
2. an independent associated locus was defined as the genomic region encompassing all SNPs in LD with the defining independent SNP to the extent  $r^2 > 0.5$ ;
3. associated loci with overlapping genes were merged;
4. SNPs within the major histocompatibility complex region (chromosome 6, base pairs 25,000,000 through 35,000,000) were excluded; and
5. 500 sets of matched SNPs were used to calculate each  $P$ -value; 50 replications were used for FDR estimation; normalized expression data from 77,840 Affymetrix microarrays were used for the reconstitution of gene sets; and 14,461 reconstituted gene sets were used for the enrichment analysis.

The source code to identify independent signals and loci can be found at <https://github.com/perslab/gwas-snps-loci>. The DEPICT locus-construction steps resulted in 273 independent loci. After removing genes not covered by DEPICT, we were left with 685 genes (Supplementary Table 4.1). A gene is not covered by DEPICT if no mRNA transcripts mapping to the gene can be assayed by an Affymetrix probe in a manner that reliably survives quality control.



#### 4.5.8 Validation of the Significant Reconstituted Gene Sets

Supplementary Table 4.5.1 lists the 283 reconstituted gene sets (pathways or cell components) where genes in the *EduYears* loci are disproportionately found ( $FDR < 0.05$ ). For each significantly enriched gene set, Supplementary Table 4.5.1 also gives the 20 genes in the *EduYears* loci with the highest membership scores.

It is possible for the reconstitution of a gene set to reweight certain seed members unfavorably and thus alter the meaning of the set. For this reason we tested the validity of the gene sets upon reconstitution by examining the average membership score of the original seed genes. To benchmark these 283 average scores, we compared each of them to the average membership scores of seed genes from 300 randomly selected gene sets in the DEPICT inventory that did not achieve significance in our study of *EduYears*. We chose to use nonsignificant gene sets as benchmarks because many pairs of significant gene sets are highly correlated and thus especially likely to share many seed genes. We discovered that two of these benchmark gene sets were exact duplicates despite their different identifiers and removed one.

The second-to-last column of Supplementary Table 4.5.1 gives the fraction of the 299 randomly chosen gene sets whose seed members have a higher average membership score with respect to the reconstituted version of the focal gene set than the seed members of the focal gene set itself. An evident pattern is that the majority of the gene sets that fare badly according to this benchmark are protein-protein interaction (PPI) networks taken from the InWeb database. A *protein-protein interaction network* is a group of proteins whose members can maintain physical contact with a given focal protein, and it is perhaps surprising that gene sets of this nature appear not to retain their meanings upon the application of a reconstitution method based on gene co-expression. In contrast, just about all of the significant gene sets taken from GO, KEGG, Reactome, and MP appear to mean much the same thing after the reconstitution, as their seed members are usually outscored by few or none of the 299 random gene sets. A notable exception is the MP category DECREASED FEAR-RELATED RESPONSE.

The last column of Supplementary Table 4.5.1 gives the fraction of the 299 randomly chosen gene sets in which the seed members of the focal set have a higher average membership than in the focal set itself. This measure has a somewhat different interpretation than the first one discussed above. Whereas the first measure is analogous to an assessment of whether the original residents of a building are still “at home” in that building after an entire neighborhood has been redeveloped, the second is analogous to an assessment of whether the original residents are now a better fit for some other building. This measure, however, also singles out many of the PPI gene sets as potentially problematic.

Rather than proposing a biological interpretation of this pattern, we instead pass over the PPI gene sets in our subsequent discussion, which will be organized by clusters of closely related gene sets, and proceed roughly from northwest to southeast in Fig. 3. We acknowledge that aspects of our discussion below are somewhat arbitrary; for instance, many genes discussed in the context of one category are also seed or high-ranking reconstituted members of a category discussed separately, and many undoubtedly important genes and pathways are not even mentioned. The reader should therefore treat the narrative summary below as representing a necessarily partial and limited view that is nevertheless useful as a way of framing what may otherwise be an overwhelming collection of facts. For brevity, we omit all clusters without at least one member set attaining  $P < 1 \times 10^{-6}$ .

#### 4.5.9 Significant Genes and Gene Sets

DENDRITIC SPINE ORGANIZATION is named after the GO pathway defined as “a process that is carried out at the cellular level which results in the assembly, arrangement of constituent parts, or disassembly of a dendritic spine. A dendritic spine is a specialized protrusion from a neuronal dendrite and is involved in synaptic transmission.” When an extending axon makes contact with a dendrite in the course of development, the contact triggers the growth of mushroom-shaped spines from the dendrite that support various proteins needed in synaptic communication. This process depends on signaling between membrane-bound ligands called ephrins and receptors localized to dendrites<sup>13</sup>. One of these receptors is the product encoded by the DEPICT-prioritized gene *EPHA5*.

DENDRITE is named after a rather large and heterogeneous GO category; this 19-set cluster has the same character as its exemplar and is thus difficult to summarize. We will start by mentioning some prominent genes that are seed or high-ranking reconstituted members of at least one member gene set. *GRIN2A* encodes an ionotropic glutamate receptor, emerges as a top DEPICT-prioritized member of several gene sets in the cluster, and was a highly prioritized gene in the most recent GWAS of schizophrenia<sup>14</sup>. *GRM3* encodes a metabotropic glutamate receptor, emerges as one of the top DEPICT-prioritized members of reconstituted DENDRITIC SHAFT, and was also a highly prioritized schizophrenia gene. *HCNI*, which ends about 70kb from the lead *EduYears* SNP rs4493682, emerges as a highly ranked member of IMPAIRED SYNAPTIC PLASTICITY. This gene encodes a dendrite-localized hyperpolarization-activated ion channel, which acts to stabilize the dendritic membrane potential in the face of both excitatory and inhibitory input. It has recently been found that *HCNI* harbors sites where *de novo* mutations cause a syndrome characterized by epilepsy, intellectual disability, and autism spectrum disorder<sup>15</sup>. Note that *HCNI* was not present in the lists of syndromic genes used to generate Extended Data Fig. 9b. The identification of these genes and their pathways/cell components confirms our nomination of synaptic communication, mediated especially by the neurotransmitter glutamate, in our previous study of cognitive performance<sup>16</sup>.

Many of our genes are implicated in the formation and movement of *vesicles*, which are fluid-filled sacs responsible for transporting cargo between cellular locations. In a neuron the most important vesicles enclose neurotransmitters; these vesicles reside in the axon terminal and release their contents out into the synaptic cleft upon the opening of voltage-gated calcium channels. (Note that VOLTAGE-GATED CALCIUM CHANNEL COMPLEX is one of our clusters.) The protein components of these synaptic vesicles are manufactured in the neuronal cell body and transported to the axon terminal along cytoskeletal tracks known as *microtubules*. Vesicles in neurons can contain important cargo other than neurotransmitter, and a plausible example in our results is supplied by *NBEA*, a high-ranking member of DENDRITIC SHAFT. The expression of this gene is essential in the dendritic contribution to synapse formation, perhaps because of a critical role in transporting ionotropic glutamate receptors and other key proteins from their sites of manufacture in the cell body to their dendritic destinations<sup>17</sup>. Another possible example is given by *NEGR1*, which encompasses the lead *EduYears* SNP rs34305371. Strongly implicated in obesity<sup>18</sup>, this gene is a high-ranking member of TRAFFICKING OF AMPA RECEPTORS (i.e., transport of ionotropic glutamate receptors). Finally, we have the closest gene to the lead *EduYears* SNP rs11712056, *CAMKV* (formerly known as *IG5*), about which little is apparently known except that its product is often found in association with vesicles<sup>19</sup>. *CAMKV* is the gene in our DEPICT-defined loci with the second highest membership score with respect to TRAFFICKING OF AMPA RECEPTORS.

AXONOGENESIS is named after the GO category referring to “the morphogenesis or creation of shape or form of the developing axon,” and its important member gene set AXON GUIDANCE is the GO pathway defined as “the chemotaxis process that directs the migration of an axon growth cone to a specific target site in response to a combination of attractive and repulsive cues.” (The KEGG and Reactome instances of AXON GUIDANCE are also covered by DEPICT and returned as significantly enriched. A *growth cone* is a paddle-shaped structure at the end of an extending axon that simultaneously moves toward the target while lengthening the axon trailing behind it. The GO cell compartment GROWTH CONE is a significantly enriched member of the cluster DENDRITE. Growing dendrites also form growth cones, albeit smaller ones that are less well studied.) The process of axon growth is truly a marvel of nature, analogous to a railroad track extending autonomously to a distant but highly specific address by following local cues only. A class of proteins known as *netrins* plays a critical role in this process by diffusing from targets and boundaries; a growing axon will move either toward or away from a higher concentration of netrin. The DEPICT-prioritized gene *DCC* encodes a netrin receptor expressed in growing axons and often leading them toward critical crossover points at the midline of the body<sup>20</sup>. Another DEPICT-prioritized gene, *SEMA6D*, belongs to the large family encoding semaphorins, which typically act as repulsive guidance cues by binding to receptors on growth cones and bringing about a temporary halt. Recent studies suggest that the *SEMA6D* protein can either attract or repel axons, depending on the extracellular context<sup>21</sup>.

Microtubules serve as internal scaffolds of axon growth, extending onward at the end pointing away from the cell body of the originating neuron. *MAPT*, the gene encompassing the lead *EduYears* SNP rs192818565, encodes a member of the microtubule-associated protein (MAP) family that is not present in dendrites but active in the distal ends of axons. The special combination of stability and flexibility required by extending microtubules in axonogenesis is owed to microtubule-associated protein tau (MAPT), and *MAPT* itself is a highly ranked member of reconstituted GROWTH CONE, SITE OF POLARIZED GROWTH, AXON, ABNORMAL AXON GUIDANCE, AXON GUIDANCE (REACTOME), and CRMP5 IN SEMA3A SIGNALING. Tangles of hyperphosphorylated MAPT are often observed in the neurons of patients with Alzheimer’s disease (AD), although whether these tangles are a correlate/consequence of AD pathogenesis or a cause is uncertain<sup>22</sup>. *De novo* mutations of *MAPT* have been observed in patients suffering from frontotemporal dementia and parkinsonism.

SIGNALING BY ROBO RECEPTOR is named after a Reactome pathway centered on a type of receptor active in growth cones extending toward the same side of the body. The ligands of Robo receptors are the Slit proteins, which are secreted by midline cells for the purpose of repelling axons that have already crossed the midline. The DEPICT-prioritized gene *SLITRK1* belongs to a family of genes whose products share much sequence homology with Slit proteins, and it shows strong membership in SIGNALING BY ROBO RECEPTOR and several members of the AXONOGENESIS cluster. A number of studies have implicated *SLITRK1* in various aspects of synapse formation, including the development of both axons and dendrites<sup>23,24</sup>.

The first axon to reach a particular address in the nervous system is sometimes called a *pioneer*. *Follower* axons have a somewhat easier time because they can rely on guidance provided by molecules on the surface of the pioneer. Another term for bundles or tracts of axons is *fascicles*, and thus axons that grow together are said to be fasciculated. The DEPICT-prioritized gene *CELSR3* (which starts ~70kb from the lead *EduYears* SNP rs35761247) is a seed member of AXONOGENESIS retaining a high membership score, and it

encodes a transmembrane protein implicated in fasciculation. The inactivation of *CELSR3* in mice leads to selective anomalies of several major axonal tracts, including a disconnection of the neocortex from subcortical areas<sup>25</sup>. Another DEPICT-prioritized gene, *PCDH17*, stops ~100kb from the lead *EduYears* SNP rs9537821 and exhibits strong memberships in ABNORMAL AXON GUIDANCE, AXON GUIDANCE (REACTOME), and AXON GUIDANCE (KEGG). It has recently been found that when both fasciculated axons express this gene, the clustered *PCDH17* recruits other molecules that shepherd the growth cone of the follower along its way<sup>26</sup>. Knocking out *PCDH17* in mice leads to a reduction in the size and integrity of the amygdala-to-hypothalamus axonal tract.

ABNORMAL CEREBRAL CORTEX MORPHOLOGY is named after the MP category defined to include genes that, when knocked out or otherwise targeted in mice, lead to a “structural anomaly ... on the surface of the cerebral hemisphere that develops from the telencephalon and folds into gyri.” Because of the moderate genetic correlation between *EduYears* and intracranial volume (Fig. 2 and Supplementary Table 3.1), it is worthwhile to single out the most significantly enriched member set, DECREASED BRAIN SIZE, the seeds of which can lead to a reduction of brain weight or volume when targeted. The DEPICT-prioritized members *FOXP2* and *TBR1* encode transcription factors that are active during neural development, and assays of both factors may be used to determine the stage of neuronal migration and the layer of cortex affected by an experimental perturbation of brain size or structure<sup>27–29</sup>. *FOXP2* was the first gene to be implicated in language, and it has undergone two nonsynonymous substitutions in the human lineage since its divergence from other primates<sup>30,31</sup>. (We note, however, that at least one small-sample study has failed to find a relationship between SNPs in *FOXP2* and human brain structure<sup>32</sup>.) The DEPICT-prioritized member *ZIC2* can mutate to cause holoprosencephaly (failure of the forebrain to develop into two hemispheres) in both mice and humans and microcephaly (abnormally small brain size) in humans, although the precise mechanism of action involving the putative transcription factor encoded by this gene remains to be elucidated<sup>33</sup>. Our lead *EduYears* SNP rs12646808 is ~4kb from the end of the seed gene *HTT*, where mutations in the form of expanding trinucleotide repeats are responsible for Huntington’s disease. The normal (“wild-type”) form of the protein huntingtin has many functions that are not well understood, but it has been found that a drastic reduction of its levels in mice leads to disruptions of neurogenesis and malformations of the cortex<sup>34</sup>. Several DEPICT-prioritized genes have even stronger reconstituted memberships in DECREASED BRAIN SIZE than the seed genes just mentioned; these include the gene closest to the lead *EduYears* SNP rs9320913, *POU3F2* (known until recently as *BRN2*), which was prioritized in our previous study of cognitive performance<sup>16</sup>. Like *FOXP2* and *TBR1*, *POU3F2* is a transcription factor that appears to regulate its target genes in a particular class of neurons during and after their radial migration to their destined cortical layers<sup>35,36</sup>.

FOREBRAIN DEVELOPMENT is named after the GO pathway defined as “the process whose specific outcome is the progression of the forebrain over time, from its formation to the mature structure.” The seed members of the gene sets in this cluster that are prioritized by DEPICT (*TBR1*, *FOXP2*, *ZIC2*, *POU3F2*, *DCC*, *EPHA5*, *GRIN2A*) have nearly all been mentioned already. The names of certain sets—ABNORMAL TELECEPHALON DEVELOPMENT, CENTRAL NERVOUS SYSTEM NEURON DIFFERENTIATION, CEREBRAL CORTEX CELL MIGRATION—serve to emphasize the many different contiguous stages of brain development implicated by our GWAS of *EduYears*. So far we have discussed relatively later stages, such as the inside-out migration of increasingly later-born cortical neurons to more outward layers, the wiring of the axon-dendrite architecture connecting different neurons, and synaptic communication

and plasticity (the latter occurring throughout life). We will shortly turn to evidence that implicates the earlier events comprising the differentiation of neurons from progenitor cells.

SIGNALING BY EGFR is named after the Reactome pathway centered on the epidermal growth factor receptor (EGFR, formerly ErbB1). EGFR is a member of a family that also includes ErbB2, ErbB3, and ErbB4. Upon binding their ligands, these transmembrane receptors activate a cascade of processes including cell proliferation, inhibition of apoptosis (programmed cell death), and migration. The member set SIGNALING BY EGFR IN CANCER was the most significantly enriched pathway in a recent GWAS of intracranial volume<sup>37</sup>. This pathway is active in many aspects of brain development, one of which is the development of *glial* cells—non-neuronal cells in the brain that perform a variety of supportive functions such as the insulation of axons, supply of nutrients and oxygen, and removal of waste products, although there continue to be suggestive reports of astrocytic glial cells performing some information-processing role in humans<sup>38</sup>. Glioblastoma is the most common malignant primary brain tumor diagnosed in human adults, and the majority of cases are characterized by somatic mutations in both the EGFR and phosphatidylinositol 3-kinase (PI3K) pathways. (Two PI3K pathways attained significance in the GWAS of intracranial volume, and in our own results the gene set PI3K EVENTS IN ERBB4 SIGNALING is a significant member of the SIGNALING BY EGFR cluster.) The coordinated overexpression of genes in these two pathways yields up to a 50-fold overproduction of glial cells in the brains of *Drosophila* larva<sup>39</sup>. A naïve inference from these results would be that the functioning of a brain consisting of more neurons may be improved by a concomitantly larger “support staff” of glial cells. Whatever the merit of this interpretation, we can say that the pathways represented by these reconstituted gene sets are of some importance in *EduYears*, given the many genes in Supplementary Table 4.1 with very low DEPICT prioritization *P*-values and strong memberships in at least one of these sets (*PPP6R2*, *MEF2C*, *USP33*, *ZSWIM6*, *SBNO1*, *PLK2*). Although not prioritized by DEPICT, *ERBB3* starts ~57kb from the lead *EduYears* SNP rs2456973 and is nominated as a causal *EduYears* gene by three other lines of evidence, including the significant Gene Network search results REGULATION OF ACTION POTENTIAL IN NEURON and AXON ENSHEATHMENT.

NPBAF COMPLEX is named after the GO cellular component defined as “a SWI/SNF-type complex that is found in neural stem or progenitor cells.” First discovered in yeast, SWI/SNF is a chromatin remodeler composed of several gene products, and its function is to dissociate targeted segments of DNA from their nucleosomes in order to expose enhancers to transcription factors. (If a corepressor complex binds to the SWI/SNF-like complex, then the complex as a whole may down-regulate gene expression.) The human ortholog is called BAF; the prefixes es, np, and n stand for *embryonic stem*, *neural progenitor*, and *neuronal* respectively. During the development of the mammalian nervous system, each BAF complex swaps out certain subunits and thus becomes the next type of complex in the sequence. These switches appear to occur in all cells becoming neurons, indicating that they are a fundamental component of abandoning the multipotent condition and committing to a neuronal fate<sup>40</sup>. A recent study of mice found that knocking out *SMARCC2* (also known as *BAF170*), whose product is a subunit of npBAF, increases the pool of progenitor cells and ultimately the size of the cortex; conversely, overexpressing this gene in transgenic mice leads to a reduction in the number of cortical neurons<sup>41</sup>. The underlying mechanism appears to be competition between the products of *SMARCC2* and *SMARCC1* (also known as *BAF155*) for occupancy of the BAF complex. Thus, for instance, knockout of *SMARCC2* leads to the retention of *SMARCC1* in the BAF complex and a greater supply of progenitor cells capable of producing multiple neuronal lineages. Of the genes in this study showing significantly

different expression levels in the knockout mice, 35 have gene symbols coinciding with those in our list of DEPICT-prioritized genes (OR  $\approx$  1.8), including *TBR1*, *FOXP2*, *FOXP6*, *ZIC2*, *MAPT*, *DCC*, *SEMA6D*, *EPHA5*, *CELSR3*, *CAMKV*, *ZSWIM6*, and *PLK2*.

*SMARCC1* itself is prioritized by DEPICT and lies ~800kb upstream from a group of 4 lead *EduYears* SNPs on chromosome 3 that define a locus including *CELSR3*; *SMARCC1* itself is the gene closest to a DEPICT-defined independent SNP falling short of  $P < 5 \times 10^{-8}$ . The DEPICT-prioritized gene *SMARCA2* (also known as *BAF190*) encodes one of the two proteins that can fill the role of the core ATPase subunit of the BAF complex, and its start site lies ~270kb upstream of the lead *EduYears* SNP rs1871109.

We come now to the final cluster of reconstituted gene sets in our narrative summary, TRANSCRIPTION COFACTOR ACTIVITY, which is named after the GO molecular function defined as “interacting selectively and non-covalently with a regulatory transcription factor and also with the basal transcription machinery in order to modulate transcription.” This large and diverse cluster includes TRANSCRIPTION COACTIVATOR ACTIVITY (the most significantly enriched gene set in the entire analysis), TRANSCRIPTION FACTOR BINDING, CHROMATIN REMODELING COMPLEX, TRANSCRIPTION COREPRESSOR ACTIVITY, RNA POLYMERASE II TRANSCRIPTION COFACTOR ACTIVITY, and CHROMATIN BINDING. The names of the constituent gene sets broadly refer to transcriptional regulation and chromatin remodeling, pathways that have been implicated in studies of neuropsychiatric disorders<sup>40,42–43</sup>. Indeed, our discussion of the other clusters has already made it plain that *EduYears* depends on the action of many transcription factors and chromatin remodelers. The exemplars of TRANSCRIPTION COFACTOR ACTIVITY and HISTONE ACETYLTRANSFERASE COMPLEX are highly correlated. In contrast to the BAF complex, which displaces histones, the histone acetyltransferase complex marks histones with acetyl groups while leaving them in place; the end result of greater DNA accessibility is similar.

Given that so many of the genes discussed above in relation to brain size and structure are seed members of one or more sets in the TRANSCRIPTION COFACTOR ACTIVITY cluster (*TBR1*, *FOXP2*, *ZIC2*, *POU3F2*, *SMARCA2*, *SMARCC1*), we are not surprised to find the MP category INCREASED BRAIN SIZE placed here as well. The top DEPICT-prioritized member of this set is *NFIB*, which encodes a transcription factor that can be deleted in mice to produce deficits in the differentiation of neurons from their progenitors (reviewed in ref. 44).

#### 4.5.10 Significant Tissues

Extended Data Fig. 8b and Supplementary Table 4.5.2 gives the results of applying DEPICT to the GTEx expression data. There are 13 neural tissues in this analysis, and it happens that they are also the 13 most significantly enriched tissues—and, in fact, the only tissues clearing the threshold  $FDR < 0.05$ .

#### 4.5.11 Comparison with Other Phenotypes

DEPICT has now been applied in enough large-scale GWAS to motivate an overview of its results across phenotypes. Supplementary Table 4.5.3 provides the results of a coarse comparison. The column reporting prioritized gene sets gives the terms constituting the 20 most significant instances after excluding InWeb PPI subnetworks and the MP category DECREASED FEAR-RELATED RESPONSE, although in all applications far more than 20 gene sets showed low  $P$ -values and FDRs.

The comparison shows that DEPICT is not biased toward the nomination of terms related to the central nervous system. For example, when applied to the latest GWAS of height, DEPICT highlighted gene sets such as CHORDATE EMBRYONIC DEVELOPMENT, DECREASED EMBRYO SIZE, SKELETAL SYSTEM DEVELOPMENT, and CARTILAGE DEVELOPMENT; when applied to Crohn's disease (an autoimmune disorder), the most significant gene sets included REGULATION OF IMMUNE RESPONSE, T-CELL ACTIVATION, and RESPONSE TO CYTOKINE STIMULATION.

## References

1. Pers, T. H. *et al.* Biological interpretation of genome-wide association studies using predicted gene functions. *Nat. Commun.* **6**, 5890 (2015).
2. Fehrmann, R. S. N. *et al.* Gene expression analysis identifies global gene dosage sensitivity in cancer. *Nat. Genet.* **47**, 115–125 (2015).
3. McDonald, R. P. *Test Theory: A Unified Approach* (Erlbaum, 1999).
4. Ashburner, M. *et al.* Gene ontology: tool for the unification of biology. *Nat. Genet.* **25**, 25–29 (2000).
5. Kanehisa, M., Goto, S., Sato, Y., Furumichi, M. & Tanabe, M. KEGG for integration and interpretation of large-scale molecular data sets. *Nucleic Acids Res.* **40**, D109–D114 (2012).
6. Croft, D. *et al.* Reactome: a database of reactions, pathways and biological processes. *Nucleic Acids Res.* **39**, D691–D697 (2010).
7. Bogue, M. A., Grubb, S. C., Maddatu, T. P. & Bult, C. J. Mouse Phenome Database (MPD). *Nucleic Acids Res.* **35**, D643–D649 (2007).
8. Lage, K. *et al.* A human phenome-interactome network of protein complexes implicated in genetic disorders. *Nat. Biotechnol.* **25**, 309–316 (2007).
9. Cvejic, A. *et al.* *SMIM1* underlies the Vel blood group and influences red blood cell traits. *Nat. Genet.* **45**, 542–545 (2013).
10. Frey, B. J. & Dueck, D. Clustering by passing messages between data points. *Science* **315**, 972–976 (2007).
11. GTEx Consortium. The Genotype-Tissue Expression (GTEx) pilot analysis: multitissue gene regulation in humans. *Science* **348**, 648–660 (2015).
12. Purcell, S. M. *et al.* A polygenic burden of rare disruptive mutations in schizophrenia. *Nature* **506**, 185–190 (2014).
13. Akaneya, Y. *et al.* Ephrin-A5 and EphA5 interaction induces synaptogenesis during early hippocampal development. *PLoS ONE*, **5**, e12486 (2010).

14. Ripke, S. *et al.* Biological insights from 108 schizophrenia-associated loci. *Nature* **511**, 421–427 (2014).
15. Nava, C. *et al.* De novo mutations in *HCN1* cause early infantile epileptic encephalopathy. *Nat. Genet.* **46**, 640–645 (2014).
16. Rietveld, C. A. *et al.* Common genetic variants associated with cognitive performance identified using the proxy-phenotype method. *Proc. Natl. Acad. Sci. USA* **111**, 13790–13794 (2014).
17. Miller, A. C., Voelker, L. H., Shah, A. N. & Moens, C. B. Neurobeachin is required postsynaptically for electrical and chemical synapse formation. *Curr. Biol.* **25**, 16–28 (2015).
18. Locke, A. E. *et al.* Genetic studies of body mass index yield new insights for obesity biology. *Nature* **518**, 197–206 (2015).
19. Godbout, M. *et al.* IG5: a calmodulin-binding, vesicle-associated, protein kinase-like protein enriched in forebrain neurites. *J. Neurosci.* **14**, 1–13 (1994).
20. Stein, E., Zou, Y., Poo, M. & Tessier-Lavigne, M. Binding of DCC by netrin-1 to mediate axon guidance independent of adenosine A2B receptor activation. *Science* **291**, 1976–1982 (2001).
21. Dudanova, I. & Klein, R. Integration of guidance cues: parallel signaling and cross talk. *Trends Neurosci.* **36**, 295–304 (2013).
22. Goedert, M. & Spillantini, M. G. A century of Alzheimer's disease. *Science* **314**, 777–781 (2006).
23. Aruga, J. & Mikoshiba, K. Identification and characterization of Slitrk, a novel neuronal transmembrane protein family controlling neurite outgrowth. *Mol. Cell. Neurosci.* **24**, 117–129 (2003).
24. Abelson, J. F. *et al.* Sequence variants in *SLITRK1* are associated with Tourette's syndrome. *Science* **310**, 317–320 (2005).
25. Tissir, F., Bar, I., Jossin, Y. De Backer, O. & Goddinet, A. M. Protocadherin *Celsr3* is crucial in axonal tract development. *Nat. Neurosci.* **8**, 451–457 (2005).
26. Hayashi, S. *et al.* Protocadherin-17 mediates collective axon extension by recruiting actin regulator complexes to interaxonal contacts. *Dev. Cell* **30**, 673–687 (2014).
27. Chenn, A. & Walsh, C. A. Regulation of cerebral cortical size by control of cell cycle exit in neural precursors. *Science* **297**, 365–369 (2002).
28. Shen, Q. *et al.* The timing of cortical neurogenesis is encoded within lineages of individual progenitor cells. *Nat. Neurosci.* **9**, 743–751 (2006).



29. Silver, D. L. *et al.* The exon junction complex *Magoh* controls brain size by regulating neural stem cell division. *Nat. Neurosci.* **13**, 551–558 (2010).
30. Enard, W. *et al.* Molecular evolution of *FOXP2*, a gene involved in speech and language. *Nature* **418**, 869–872 (2002).
31. Van der Lely, H. K. J. & Pinker, S. The biological basis of language: insight from developmental grammatical impairments. *Trends Cogn. Sci.* **18**, 586–595 (2014).
32. Hoogman, M. *et al.* Assessing the effects of common variation in the *FOXP2* gene on human brain structure. *Front. Hum. Neurosci.* **8**, 473 (2014).
33. Warr, N. *et al.* *Zic2*-associated holoprosencephaly is caused by a transient defect in the organizer region during gastrulation. *Hum. Mol. Genet.* **17**, 2986–2996 (2008).
34. Cattaneo, E., Zuccato, C. & Tartari, M. Normal huntington function: an alternative approach to Huntington’s disease. *Nat. Rev. Neurosci.* **6**, 919–930 (2005).
35. McEvelly, R. J. *et al.* Transcriptional regulation of cortical neuron migration by POU domain factors. *Science* **295**, 1528–1532 (2002).
36. Lancaster, M. A. *et al.* Cerebral organoids model human brain development and microcephaly. *Nature* **501**, 373–379 (2013).
37. Hibar, D. P. *et al.* Common genetic variants influence human subcortical brain structures. *Nature* **520**, 224–229 (2015).
38. Han, X. *et al.* Forebrain engraftment by human glial progenitor cells enhances synaptic plasticity and learning in adult mice. *Cell Stem Cell* **12**, 342–353 (2013).
39. Read, R. D., Cavenee, W. K., Furnari, F. B. & Thomas, J. B. A *Drosophila* model for EGFR-Ras and PI3K-dependent human glioma. *PLoS Genet.* **5**, e1000374 (2009).
40. Ronan, J. L., Wei, W. & Crabtree, G. R. From neural development to cognition: unexpected roles for chromatin. *Nat. Rev. Genet.* **14**, 347–359 (2013).
41. Tuoc, T. C. *et al.* Chromatin regulation by BAF170 controls cerebral cortical size and thickness. *Dev. Cell* **25**, 256–269 (2013).
42. De Rubeis *et al.* Synaptic, transcriptional and chromatin genes disrupted in autism. *Nature* **515**, 209–215 (2014).
43. Network and Pathway Analysis Subgroup of the Psychiatric Genomics Consortium. Psychiatric genome-wide association study analyses implicate neuronal, immune and histone pathways. *Nat. Neurosci.* **18**, 199–209 (2015).
44. Piper, M. *et al.* NFIB-mediated repression of the epigenetic factor *Ezh2* regulates cortical development. *J. Neurosci.* **34**, 2921–2930 (2014).

## 4.6 Enrichment of Loci by Genes Implicated in Syndromic Disorders

### 4.6.1 Overview

Common variants of small effect and *de novo* mutations of large effect, affecting the same trait (or closely related traits), often map to the same genes. Here we determined whether the genes implicated by our GWAS meta-analysis of common variants associated with *EduYears* also tend to be genes containing sites where *de novo* mutations are known or believed to cause one of three syndromic forms of impaired cognitive function (intellectual disability, autism spectrum disorder, schizophrenia). Our two distinct approaches to testing enrichment consistently indicate that *EduYears*-associated loci are indeed enriched by genes where *de novo* mutations have been implicated in these syndromic disorders. The biological insights obtained from studies of these disorders thus have some applicability to educational attainment.

### 4.6.2 Background

Some large-scale GWAS have found that loci centered on “common SNPs” (where the frequencies of both alleles are at least moderate) tend to contain genes where *de novo* mutations produce large and deleterious effects on related traits. For example, the Psychiatric Genomics Consortium’s most recent GWAS of schizophrenia (SCZ) found that their top loci show substantial overlap with genes where *de novo* mutations may have large effects on SCZ itself, autism spectrum disorder (ASD), and intellectual disability (ID)<sup>1</sup>.

We looked for a similar pattern in loci defined by SNPs associated with *EduYears* in our GWAS meta-analysis. We will call ID, ASD, and SCZ *syndromic* forms of impaired cognitive function because these disorders (especially when caused by *de novo* mutations) often co-occur with other physical and behavioral symptoms, although it should be kept in mind that this term is often restricted to forms of these disorders that invariably co-occur with such symptoms.

*Intellectual disability* is defined as a combination of very low cognitive performance (as assessed with a validated psychometric instrument) and poor adaptation to the social and practical challenges of everyday life, arising before the onset of adulthood. We have already demonstrated that common SNPs give rise to a strong genetic correlation between cognitive performance and *EduYears* (Fig. 2 and Supplementary Table 3.1). Postmortem studies of human brains and animal models of ID-causing conditions such as fetal alcohol exposure implicate perturbed neuronal migration and dendritic abnormalities in the etiology of this syndrome<sup>2,3</sup>. *Autism spectrum disorder* refers to a number of diseases sharing in common the symptoms of impaired social skills and excessive interest in narrow and repetitive pursuits. It is usually diagnosed at a young age; many forms of ASD are characterized by delayed language and poor cognitive performance. *Schizophrenia* is a disorder of thought characterized by delusions, hallucinations, and withdrawal from social interactions, and it is often accompanied by gross brain abnormalities such as the reduced volume of particular regions. Unlike ID and ASD, SCZ is typically diagnosed in late adolescence or early adulthood.

We now briefly describe the two complementary approaches that we used to test enrichment of *EduYears*-associated loci by genes where *de novo* mutations have been implicated in the syndromic diseases described above. In the first approach, we took forward the set of genes nominated by DEPICT for involvement in *EduYears* and examined the respective intersections of this set with syndromic genes for ID, ASD, and SCZ. Because DEPICT's nominations at different loci are not independent, it is difficult to test the statistical significance of the resulting enrichment statistics. For this reason we determined whether DEPICT is more likely to prioritize syndromic genes for ID, ASD, and SCZ when the GWAS phenotype is *EduYears* rather than body mass index (BMI)<sup>4</sup>, height<sup>5</sup>, or waist-to-hip ratio adjusted for BMI (WHR)<sup>6</sup>. All three of these anthropometric traits have been recently interrogated by DEPICT in GWAS meta-analyses employing sample sizes comparable to ours.

In the second approach, we determined whether genes centered on SNPs attaching the threshold  $P < 5 \times 10^{-8}$  loci show an unusually large intersection with syndromic genes when compared to sets of loci randomly drawn from across the genome but constrained to match certain properties of the GWAS loci. While this latter approach has the advantage of enabling the calculation of empirical *P*-values, it may be overly conservative in that any inherent difference between *EduYears* and other phenotypes in a property used for selecting matched loci (e.g., gene density near causal sites) may produce "control groups" that are spuriously similar to the *EduYears* loci themselves.

#### **4.6.3 DEPICT-nominated Genes for the Four GWAS Phenotypes**

Our Supplementary Table 4.1 lists all 146 genes that were prioritized by DEPICT for *EduYears* (FDR < 0.05). Supplementary Table 24 of ref. 4 lists the 202 genes with valid symbols that were similarly prioritized by DEPICT for BMI; Supplementary Table 16 of ref. 5, the 649 genes for height; and finally Supplementary Table 21 of ref. 6, the 31 genes for WHR.

#### **4.6.4 Constructing the Lists of Syndromic Genes**

The list of ID genes was constructed from Supplementary Table 10 of ref. 7. The authors of this study located a larger set of putative ID genes in a systematic literature review and database search. They then listed the subset of genes found to contain *de novo* mutations in at least five ID patients. This original list contained 528 gene symbols. After using the SNPsnap database ([http://www.broadinstitute.org/mpg/snpsnap/database\\_download.html](http://www.broadinstitute.org/mpg/snpsnap/database_download.html))<sup>8</sup> to map the gene symbols to Ensembl identifiers, we discarded all symbols without a match. We then eliminated all genes mapping to the X chromosome. Recall that we did not include the X chromosome in our GWAS meta-analysis (nor did any of the GWAS of anthropometric traits). Removing genes on the X chromosome is particularly important in our case because this chromosome is greatly enriched by ID genes. These processing steps produced a list of 431 genes.

Our lists of ASD and SCZ genes were derived from the information in Supplementary Tables 1 and 2 of ref. 9. The authors of this study listed all genes found to contain a *de novo* mutation in ASD and SCZ probands participating in recently published exome-sequencing studies. We filtered these lists so as to include only genes whose mutations fall in the following categories of nonsynonymous sites: CODON-DELETION, CODON-INSERTION, SPLICE, FRAMESHIFT, MISSENSE, NONSENSE, and START-LOST. We then followed exactly the same

procedure that we used to clean the list of ID genes. These processing steps produced lists consisting of 713 ASD and 646 SCZ genes respectively.

As a negative control, we looked at the intersection of genes implicated in GWAS with genes containing sites where mutations are believed to cause disorders of abnormal skeletal growth (SKEL) such as Marfan syndrome. The list of SKEL genes was taken from Supplementary Table 9 of ref. 5; the GIANT Consortium investigators compiled this list by searching the Online Mendelian Inheritance in Man database with the keywords SHORT STATURE, OVERGROWTH, SKELETAL DYSPLASIA, and BRACHYDACTYLIC. Applying the same cleaning procedure described above led to a list of 232 genes.

We used the odds ratio as the measure of overlap between the relevant sets of syndromic and DEPICT-nominated genes. At this step we excluded all genes not covered by DEPICT from the lists of syndromic genes. The set of genes populating the 2×2 tables in this analysis thus consisted of the 16,133 autosomal protein-coding genes covered by DEPICT.

When we use the traits examined in other large-scale GWAS as a benchmark, the conceptual experiment is to examine how the association between syndromic and GWAS-implicated genes varies as we fix the sample size within a range (more or less between 225,000 and 340,000 individuals) but vary the target phenotype of the GWAS. If the association between the GWAS phenotype and a particular syndromic disorder is strongest when the phenotype is *EduYears*, the claim for the biological significance of the association is substantiated.

#### **4.6.5 Finding Matches for Loci Defined by SNPs Reaching $P < 5 \times 10^{-8}$**

To perform our benchmarking exercise without relying on DEPICT's nominations of genes, we retrieved the respective lists of independent strictly significant SNPs ( $P < 5 \times 10^{-8}$ ) from the GWAS results of the four phenotypes under consideration. We subsequently used the tool SNPsnap (<http://www.broadinstitute.org/mpg/snpsnap/>)<sup>8</sup> to obtain lists of genes contained within the locus of each SNP. By default, SNPsnap drops SNPs whose chromosomal coordinates cannot be identified and SNPs in the human leukocyte antigen (*HLA*) region. After the exclusion of SNPs not recognized by SNPsnap, we were left with 676 height SNPs (21 dropped), 94 BMI SNPs (3 dropped), 70 *EduYears* SNPs (4 dropped), and 47 WHR SNPs (2 dropped). We used SNPsnap's default settings to define a locus ( $r^2 > 0.5$ ) and the odds ratio as the measure of overlap between the set of syndromic genes and genes overlapping loci centered on strictly significant SNPs. When calculating odds ratios, we constrained each gene to contribute a single count even if it overlapped more than one locus. The set of genes populating the 2×2 tables in this analysis consisted of the 19,484 autosomal protein-coding genes covered by SNPsnap.

We also used SNPsnap to test the significance of a given overlap between syndromic and GWAS-implicated genes. For each combination of GWAS phenotype and syndromic disorder, we started with the  $n$  lead SNPs identified by the GWAS that are also recognized by SNPsnap. We calculated the number of genes in each of the loci defined by these SNPs that appear in the relevant list of syndromic genes. (We allowed a given gene to contribute to the counts of more than one locus. If independent SNPs associated with a phenotype in a GWAS tend to cluster near a given syndromic gene, this phenomenon is clearly of biological importance.) We then randomly generated 2,000 sets of  $n$  SNPs, where the  $i$ th member of each set was selected to match the  $i$ th SNP taken forward from the given GWAS ( $i = 1, \dots, n$ ) in certain respects. Procedurally, we used the 1000 Genomes European Phase 3 reference

panel and the default SNPsnap matching criteria ( $MAF \pm 0.05$ , gene density  $\pm 50\%$ , distance to nearest gene  $\pm 50\%$ , and number of LD buddies  $\pm 50\%$  using  $r^2 > 0.5$ ). For each set of matched SNPs generated under these settings, we calculated the difference between the vector of syndromic gene counts in the actual GWAS loci and the vector of counts in the matched loci. The mean of this difference vector can be interpreted as the average difference in syndromic genes per locus between the GWAS loci and their matches. We counted the number of these means falling below zero and divided the count by 2,000 to obtain the empirical one-sided  $P$ -value.

Because functional regions of the genome differ systematically from biologically inert regions in properties such as gene and SNP density, the fact that *EduYears*-associated SNPs are the output of a GWAS disqualifies the unconstrained random selection of SNPs as an appropriate null model of randomness. A GWAS of any trait whatsoever is more likely to yield loci encompassing ID genes (say) than unconstrained random selection. Our matching procedure is therefore an attempt to generate random sets of SNPs resembling those likely to be yielded by a GWAS or some other study of genome function. This attempt to use the focal GWAS itself to supply the values of the biologically relevant matching parameters might fail if the genetic architecture of the trait under consideration is unusual—for example, because the density of genes in the loci centered on the causal sites is even higher than what is found in a typical functional region. Nevertheless we note that the basic approach implemented in SNPsnap has been frequently employed; see ref. 8 for citations of relevant studies. Since the number of SNPs is constant across random realizations, the SNPsnap approach implicitly titrates the sample size of the hypothetical GWAS-like studies to yield a fixed number of significant hits.

#### 4.6.6 Results

The intersections of DEPICT-nominated *EduYears* genes with the respective sets of genes implicated in ID, ASD, and SCZ are given in Extended Data Fig. 9c and Supplementary Table 4.1. The results of our analyses are given in Supplementary Table 4.6.1.

Extended Data Fig. 9b displays the results of our primary analysis relying on DEPICT-nominated genes. The odds ratio corresponding to the intersection between *EduYears*-associated genes and ID genes ( $\sim 4.2$ ) is more than twice as large as when the GWAS phenotypes are anthropometric in nature. The trend for ASD is similar but less marked, whereas *EduYears* and SCZ genes do not seem to exhibit a biologically significant intersection. It is possible that *de novo* SNP mutations (as opposed to copy number variants<sup>10</sup>) tend not to make a consistently signed joint contribution to cognitive performance and SCZ liability. Our null finding with respect to SCZ should not be taken as definitive, however, since it is our list of SCZ genes that likely contains the largest fraction of false positives. This list is not as well curated as the list of ID genes, and *de novo* SNP mutations increasing SCZ liability have not been confidently identified in subsequent studies.

As a robustness check, we recalculated the ASD odds ratios using a list of ASD genes published after the initiation of our bioinformatic pipeline<sup>11</sup>. The authors of this exome-sequencing study calculated an FDR associated with each gene in their ranked list, enabling the selection of a high-confidence subset. Taking forward only the 107 ASD genes satisfying  $FDR < 0.05$ , we found odds ratios of 5.31 for *EduYears*, 2.84 for BMI, 1.81 for height, and 0 for WHR. Since this list is about 6 times smaller than our primary list of ASD genes drawn from ref. 9, the intersections are very small and thus do not lead to smooth changes in the

corresponding odds ratios with size. For instance, the intersection of *EduYears* and the high-confidence ASD set contains only *SRPK2*, *QRICH1*, *TBR1*, and *BCL11A*. Nevertheless it is reassuring that the latter three genes are also members of our primary ASD list.

The intersections between the GWAS-implicated genes and the SKE genes exhibit a dramatically different pattern. The SKEL odds ratios for *EduYears* and BMI are both smaller than one. In contrast, genes implicated in GWAS of height and WHR show substantial overlap with genes where *de novo* mutations can lead to syndromic disorders of skeletal growth. The stark contrast between ID and SKEL genes in Extended Data Fig. 9b highlights the specific connection of ID to *EduYears* and suggests that *de novo* mutations at the relevant sites are responsible for severe disturbances of the biology underlying cognitive performance.

The secondary analysis employing all genes in loci centered on lead SNPs ( $P < 5 \times 10^{-8}$ ) produced broadly similar results (Supplementary Table 4.6.1). *EduYears* is again the trait whose GWAS-implicated genes are most likely to harbor sites where mutations are known or suspected to cause ID and ASD, and height and WHR are again the traits showing the tightest connections to genes where mutations can cause SKEL. The SNPsnap  $P$ -values track the relevant odds ratios closely. (The  $P$ -values are also influenced by the numbers of significant SNPs and putative syndromic genes. Note that if several independent SNPs are near the same syndromic gene, then it is possible in Supplementary Table 4.6.1 for a “top loci” odds ratio to be less than one and for the corresponding one-sided  $P$ -value to be less than 0.50.) In particular, the overlap of genes near *EduYears* lead SNPs with genes where *de novo* mutations have been linked to the syndromic disorders ID ( $P = 0.006$ ), ASD ( $P < 0.001$ ), and SCZ ( $P = 0.156$ ) range from suggestive to highly significant.

## References

1. Ripke S. *et al.* Biological insights from 108 schizophrenia-associated genetic loci. *Nature* **511**, 421–427 (2014).
2. Nelson, D. L. in *Vogel and Motulsky's Human Genetics: Problems and Approaches* (eds. Speicher, M. R., Antonarakis, S. E. & Motulsky, A. G.) 663–680 (Springer, 2010).
3. Fahrbach, S. E. *Development Neuroscience: A Concise Introduction* (Princeton Univ. Press, 2013).
4. Locke, A. E. *et al.* Genetic studies of body mass index yield new insights for obesity biology. *Nature* **518**, 197–206 (2015).
5. Wood, A. R. *et al.* Defining the role of common variation in the genomic and biological architecture of adult human height. *Nat. Genet.* **46**, 1173–1186 (2014).
6. Shungin, D. *et al.* New genetic loci link adipose and insulin biology to body fat distribution. *Nature* **518**, 187–196 (2015).
7. Gilissen, C. *et al.* Genome sequencing identifies major causes of severe intellectual disability. *Nature* **511**, 344–347 (2014).
8. Pers, T. H., Timshel, P. & Hirschhorn, J. N. SNPsnap: a Web-based tool for identification and annotation of matched SNPs. *Bioinformatics* **31**, 418–420 (2015).
9. Fromer, M. *et al.* De novo mutations in schizophrenia implicate synaptic networks. *Nature* **506**, 179–184 (2014).
10. Stefansson, H. *et al.* CNVs conferring risk of autism or schizophrenia affect cognition in controls. *Nature* **505**, 361–366 (2014).
11. De Rubeis, S. *et al.* Synaptic, transcriptional and chromatin genes disrupted in autism. *Nature* **515**, 209–215 (2014).

## 4.7 Temporal Expression Pattern of Genes Prioritized by DEPICT

### 4.7.1 Overview

The expression level of a gene typically varies across time, partly depending on the extent to which the gene product is needed at a particular point in development. We investigated the variation in brain-specific expression levels of *EduYears*-associated genes (as prioritized by DEPICT) across time points ranging from early fetal stages to adulthood. We have previously applied our method to results from a GWAS of schizophrenia and found that genes prioritized for that disorder tend to be more highly expressed in the brain than non-prioritized genes throughout the lifespan—but particularly during *postnatal* development (Pers *et al.* in progress). In contrast, when we applied our method to the present GWAS of *EduYears*, we found that the prioritized genes tend to be more highly expressed in the brain throughout the lifespan but particularly during *prenatal* development.

### 4.7.2 Background

Genes exhibit variable expression levels throughout life. For instance, since few new neurons are generated from progenitor cells in human adults, one might expect the expression levels of genes involved in neurogenesis to be high during early developmental stages and then to decline. Conversely, one might expect genes whose expression within neurons is modulated by second messengers during episodes of learning and memory formation to remain highly expressed during adulthood.

Previous studies have measured gene expression levels in a number of human brain regions at different stages ranging from early prenatal development (~9 weeks after conception) to adulthood (~20 to 60 years of age)<sup>1,2</sup>. Typically these studies use laser microdissection to isolate distinct brain regions in postmortem brain samples from clinically unremarkable donors. Afterwards, gene expression levels are quantified using microarray- or sequencing-based technologies. Data from such studies can be consulted in order to determine whether the genes prioritized by GWAS results (e.g., by DEPICT) tend to be preferentially expressed at particular points in development. Any trend uncovered by such an analysis must be interpreted cautiously. For instance, the temporal expression pattern of the most highly prioritized genes found in early GWAS with smaller sample sizes may differ from those of genes found in later GWAS with larger sample sizes (which have the resolution to detect associations of smaller magnitude reflecting potentially distinct biology). Also, the gene expression data may be confounded by differences in RNA integrity between brain regions and factors related to the individual such as cause of death. Nevertheless elevated expression levels during a particular temporal window tentatively support the inference that developmental events occurring during that window play some role in producing the phenotypic variation observed at the time of assessment.

### 4.7.3 Gene Expression Normalization and Analysis

For previous work, Pers *et al.* downloaded normalized BrainSpan Developmental Transcriptome RNA-Seq data (see URLs; download date October 31, 2014). We further processed the RNA-Seq data by winsorizing all genes with more than 50 reads per kilobase



of transcript per million reads (RPKM) to a value of 50 and transforming to  $\log_2(1+RPKM)$ . In total 4,586 genes were affected by winsorizing (~2% of the expression values).

The downloaded datasets contained measurements of each gene's expression levels in 26 different brain regions (primary auditory cortex, amygdaloid complex, cerebellum, and so on) at 12 developmental stages (prenatal, infancy, and so on). Supplementary Table 4.7.1 provides each individual's stage at death and donated brain regions. The developmental stages were defined using the BrainSpan Developmental Transcriptome technical white paper, release October 2013 v.5 (see the URLs listed at the end of this subsection). For each combination of individual donor and brain region, we computed the median expression level in  $\log_2(1+RPKM)$  of (1) all genes prioritized by DEPICT for *EduYears* and (2) all genes in the human genome captured in the dataset. In order to summarize the expression of prioritized genes across all regions, we then computed each individual's mean of the regional median expression levels. The mean of this latter quantity over all individuals representing a given developmental stage was taken as the stage's essential data point. The expression data and source code to compute the temporal expression profiles and carry out the accompanying statistical tests can be found at <https://github.com/perslab/temporal-brain-expression>.

To assess whether DEPICT-prioritized genes were more highly expressed prenatally or postnatally, we used a paired *t*-test to calculate the significance of this contrast (the linear combination of stage means giving weight +1/6 to each of the prenatal stages and -1/6 to each of the postnatal stages). We performed Levene's test of homogeneous variance across stages and could not reject this assumption. We therefore used a pooled estimate of the variance in the *t*-test. Although linear mixed models offer a potentially more powerful means of aggregating the data and testing any trend over time, we chose to proceed with our simpler method in accordance with the plotting of the data in Extended Data Fig. 9a.

#### 4.7.4 Results

The 146 genes prioritized for *EduYears* (including those without gene symbols in Supplementary Table 4.1) exhibited higher expression levels during prenatal development (fold-change 1.36,  $P = 6.02 \times 10^{-8}$ ).

Extended Data Fig. 9a displays the time course of gene expression in finer detail. The red curve represents the average median expression levels of the DEPICT-prioritized *EduYears* genes as function of time, beginning with 8 weeks after conception and ending with adulthood (>20 years). (The induction of the head occurs about 4 weeks after conception in humans.) The error bars represent 95% confidence intervals based on the pooled estimate of the within-stage variance. For comparison, the black curve represents the average median expression levels of all genes, which by the nature of the normalization should remain close to zero. We can see that the prioritized genes exhibit above-background levels of expression in the brain at every point of development. Expression levels are highest very early in development, however, and then decline through birth and remain below the earlier levels throughout adulthood. Each of the gray curves represents expression of the prioritized genes in a specific brain region as a function of time, and we can see that most of them track the global trend.

We have extensively tested and ruled out the possibility that DEPICT is biased toward the prioritization of genes that are highly expressed at particular time points (Pers *et al.* in progress). Moreover, a previous application of our method found that genes prioritized by

DEPICT for schizophrenia exhibit higher levels of expression *postnatally*, which demonstrates that our result in the case of *EduYears* cannot easily be ascribed to an artifact.

There is one potential confound that we are able to address with the available data. We can imagine that if *EduYears* causal genes are more highly expressed throughout life in a particular brain region that has been donated exclusively by individuals who died before birth, then the downward trend of the red curve in Extended Data Fig. 9a might be due to this confounding. However, the visual appearance of the gray curves in Extended Data Fig. 9a suggests that this type of confounding is not a concern, and we can formally support this impression by testing only those brain regions donated by individuals representing all 12 developmental stages. There are 6 such regions—the amygdaloid complex, hippocampus, inferolateral temporal cortex, anterior cingulate (medial prefrontal) cortex, orbitofrontal cortex, and ventrolateral prefrontal cortex (Supplementary Table 4.7.1). It happens that these regions are known to subserve higher cognitive functions such as learning, memory, thinking, reasoning, decision making, and executive monitoring<sup>3</sup>.

We inspected the detailed temporal trajectories of these 6 brain regions and found that each one resembles the red curve in Extended Data Fig. 9a. Because some developmental stages at this regional level are represented by a single donor, we tested the significance of the downward trend over time by permuting the stage labels and determining how often the higher mean expression level measured in the “prenatal” donors exceeds the difference actually observed. When tested individually, each of the 6 brain regions achieved an empirical one-sided  $P < 0.001$ .

## URLs

BrainSpan Developmental Transcriptome gene expression data:

<http://www.brainspan.org/static/download.html>

BrainSpan Developmental Transcriptome technical white paper – stage definition:

<http://help.brain-map.org/display/devhumanbrain/Documentation>

## References

1. Colantuoni, C. *et al.* Temporal dynamics and genetic control of transcription in the human prefrontal cortex. *Nature* **478**, 519–523 (2011).
2. Kang, H. J. *et al.* Spatio-temporal transcriptome of the human brain. *Nature* **478**, 483–489 (2011).
3. Gazzaniga, M. S. *The Cognitive Neurosciences* (MIT Press, 2009).

## 5 Polygenic Prediction

We performed out-of-sample prediction using the cohorts STR and HRS as holdout samples. The score for each cohort was constructed using meta-analytic results from our *EduYears* sample with the cohort omitted.

### 5.1 Methods

We employed two different methods to construct the polygenic scores for STR and HRS, depending on the  $P$ -value threshold. First, for a range of threshold  $P$ -values— $5 \times 10^{-8}$ ,  $5 \times 10^{-7}$ ,  $5 \times 10^{-6}$ ,  $5 \times 10^{-5}$ ,  $5 \times 10^{-4}$ —we used the top *EduYears*-associated SNPs selected from a conditional-joint (COJO) analysis<sup>1,q</sup> conducted in the software GCTA<sup>2</sup>, using the estimates from a meta-analysis excluding STR and HRS, respectively. The results for the SNPs selected by GCTA-COJO at the  $P$ -threshold of  $5 \times 10^{-8}$ , using HRS as a reference sample for LD estimation, are reported in Supplementary Table 5.1. The scores were constructed using PLINK<sup>3</sup>.

Second, for the threshold  $P$ -value of 1, the effect sizes from the original meta-analysis were used as weights to construct the score (i.e., the GWAS coefficients that were estimated via univariate regression, rather than GCTA-COJO coefficients from multiple regression)<sup>r</sup>. At this threshold, we constructed two scores: one using all SNPs (both directly genotyped and imputed) and one using only the directly genotyped SNPs. (We did not originally intend to construct a score using only the directly genotyped SNPs, but post hoc analyses revealed that it had greater explanatory power.) The number of SNPs included in the score at each  $P$ -value threshold in each analysis are shown in Supplementary Table 5.2.

The genotypes of all the individuals have been imputed to the 1000G reference panel. Using GCTA<sup>2</sup> and all the common variants on HapMap3, we estimated ten principal components (PCs) in each of the STR and HRS cohorts. Note that we computed the HRS PCs ourselves using the European-only subsample described above (rather than using those provided by the HRS).

We followed two similar but distinct approaches to estimate the predictive power of all these polygenic scores in samples of unrelated individuals in the STR and the HRS. We prefer the first approach of estimating incremental  $R^2$ , but we also report the second because it has been used in prior GWAS research. The two approaches also differ slightly in their samples due to different methods of dropping unrelated individuals.

---

<sup>q</sup> In the COJO analysis, SNPs are selected through a step-wise model selection procedure that finds a set of SNPs where each SNP meets some specified  $P$ -value threshold conditional on all of the other SNPs in the set, and no SNP can be added that meets the  $P$ -value threshold conditional on the SNPs in the selected set. Using a reference data set drawn from the same population, the coefficients that arise from this analysis may be thought of as approximately equal to what would be estimated if the selected model were directly estimated with individual-level data.

<sup>r</sup> The COJO analysis only works when the number of analyzed SNPs is smaller than the number of individuals in the reference dataset because COJO involves inverting the variance-covariance matrix of the genotypes estimated from the reference data. When the number of SNPs in the analysis (which is all SNPs when the  $P$ -value threshold is 1) is greater than the sample size, this inverse is not defined.

### *Approach 1*

For the STR cohort, we randomly selected one sibling per family to include in the analysis (the HRS cohort is not family-based, so the individuals are unrelated). In the HRS, only the individuals of European ancestry, as reported in the HRS quality control documentation<sup>4</sup>, were included in the analyses. This left 10,810 and 8,641 individuals in the STR and HRS, respectively.

For each score, we first regressed *EduYears* on sex, birth year, squared birth year, and the first 10 PCs. Then we estimated the same regression with the score as an additional covariate, and we calculated the incremental  $R^2$  from including the score in the regression.

The results of this approach are shown in Supplementary Table 5.2.

### *Approach 2*

For both the STR and the HRS cohorts, we selected samples of unrelated individuals based on the estimated genetic relatedness from common SNPs using a relatedness threshold of 0.05. In the HRS, only the samples of European ancestry, as reported the HRS quality control documentation<sup>4</sup>, were included in the analyses. This left 9,339 and 8,538 unrelated individuals in the STR and HRS, respectively.

The dependent variable was constructed as follows: for each cohort and sex, we regressed *EduYears* on age and standardized the resulting residuals (so they have mean 0 and variance 1).

We regressed the standardized *EduYears* residuals on the residuals resulting from regressing the polygenic score on the first 10 PCs.

The results of this approach are reported in Supplementary Table 5.2.

## **5.2 Discussion**

The results from both approaches show that prediction accuracy increases as more SNPs are used to construct the score, with the maximum predictive power achieved when using all the genotyped SNPs (with Approach 1). In that case, the weighted average across the two cohorts of the incremental  $R^2$  is ~3.85%. Interestingly, the score based on only the genotyped SNPs explains a larger share of the variance than the score based on all SNPs in both the STR and the HRS cohorts, although the differences are not significant. (The standard errors and confidence intervals for the incremental  $R^2$  estimates were estimated with the bootstrap method, with 1,000 bootstrap samples.)

A possible reason for this difference is that the set of all SNPs contains a larger share of SNPs with low minor allele frequencies (MAF) than the set of genotyped SNPs. For example, in the HRS dataset, 11.6% of the SNPs in the set of all SNPs have MAF between 0.01 and 0.02, and 16.4% have MAF between 0.02 and 0.05, versus 1.5% and 5.7%, respectively, for the set of genotyped SNPs. If the effect sizes of the low-MAF SNPs tend to be similar to those of the other SNPs, then the estimates of the former will be less precise relative to their explanatory power since the standard errors of estimates of effect sizes are larger for low-MAF SNPs. In that case, they will thus tend to add noise to the score based on all SNPs and to reduce its

explanatory power. However, it is not clear whether the effect sizes of the low-MAF SNPs are generally similar to those of the other SNPs, and it is in fact often assumed that rare SNPs have relatively larger effect sizes (see, e.g., the LD Score regression framework<sup>5</sup>). Furthermore, given that the differences in the estimates of the incremental  $R^2$  are not significant, the differences could also simply be due to sampling variation.

The magnitude of predictive power that we observe is less than one might have expected on the basis of statistical genetics calculations<sup>6</sup> and GCTA-GREML estimates of “SNP heritability” from individual cohorts. Indeed, Rietveld et al. (2013)<sup>7</sup> reported GCTA-GREML estimates of SNP heritability for each of two cohorts (STR and QIMR), and the mean estimate was 22.4%. Assuming that 22.4% is in fact the true SNP heritability, the calculations outlined in the SOM of Rietveld et al. (pp. 22-23) generate a prediction of  $R^2 = 11.0\%$  for a score constructed from the GWAS estimates of this paper and of  $R^2 = 6.1\%$  for a score constructed from the combined (discovery + replication cohorts, but excluding the validation cohorts) GWAS sample of  $N = \sim 117,000$ -119,000 in Rietveld et al.—substantially higher than the 3.85% that we achieve here (with the score based on all genotyped SNPs) and the 2.2% Rietveld et al. achieved, respectively.

These discrepancies between the scores’ predicted and estimated  $R^2$  may be due to the failure of some of the assumptions underlying the calculation of the predicted  $R^2$ .

An alternative (or additional) explanation is that the true SNP heritability *for the GWAS sample pooled across cohorts* is lower than 22.4%. That would be the case if the true GWAS coefficients differ across cohorts, perhaps due to heterogeneity in phenotype measurement or gene-by-environment interactions. If so, then a polygenic score constructed from the pooled GWAS sample would be expected to have lower predictive power in an individual cohort than implied by the calculations above. Based on that reasoning, the  $R^2$  of 2.2% observed by Rietveld et al. (2013) could be rationalized by assuming that the proportion of variance accounted for by common variants across the pooled Rietveld cohorts is only 12.7%<sup>6</sup>. (We obtain a similar estimate, 11.5% with a standard error of 0.45%, when we use LD Score regression<sup>5</sup> to estimate the SNP heritability using our pooled-sample meta-analysis results from this paper, excluding deCODE and without GC. While we believe this estimate is based on cohort results without GC, it is biased downward if any cohort in fact applied GC.) If we assume that the 12.7% is valid also for the cohorts considered in this study, we would predict an  $R^2$  equal to 4.5%, somewhat higher than we observe in HRS and STR but much closer. However, the degree of correlation in coefficients across cohorts appears to be relatively high (Supplementary Table 1.10 reports estimates of the genetic correlation between selected cohorts and deCODE; although the correlation estimates vary a lot across cohorts, they tend to be large for the largest cohorts, and the weighted average is 0.76). We do not know whether a pooled-cohort SNP heritability of 12.7% or lower can be reconciled with the observed degree of correlation in coefficients across cohorts.

## References

1. Yang, J. *et al.* Conditional and joint multiple-SNP analysis of GWAS summary statistics identifies additional variants influencing complex traits. *Nat. Genet.* **44**, 369–375 (2012).
2. Yang, J., Lee, S. H., Goddard, M. E. & Visscher, P. M. GCTA: a tool for genome-wide complex trait analysis. *Am. J. Hum. Genet.* **88**, 76–82 (2011).

3. Chang, C. C. *et al.* Second-generation PLINK: rising to the challenge of larger and richer datasets. *GigaScience* **4**, 7 (2015).
4. Health and Retirement Study. *Quality Control Report for Genotypic Data*. <[http://hrsonline.isr.umich.edu/sitedocs/genetics/HRS\\_QC\\_REPORT\\_MAR2012.pdf](http://hrsonline.isr.umich.edu/sitedocs/genetics/HRS_QC_REPORT_MAR2012.pdf)> (2012).
5. Bulik-Sullivan, B. K. *et al.* LD Score regression distinguishes confounding from polygenicity in genome-wide association studies. *Nat. Genet.* **47**, 291–295 (2015).
6. Daetwyler, H. D., Villanueva, B. & Woolliams, J. A. Accuracy of predicting the genetic risk of disease using a genome-wide approach. *PLoS One* **3**, e3395 (2008).
7. Rietveld, C. A. *et al.* GWAS of 126,559 individuals identifies genetic variants associated with educational attainment. *Science* **340**, 1467–1471 (2013).

## 6 Mediation

As reported above in Supplementary Information section 5, the polygenic score (PGS) for *EduYears* constructed from all SNPs (imputed and directly genotyped) is significantly associated with *EduYears*, with predictive power  $R^2 \approx 2.7\%$  and  $R^2 \approx 3.8\%$  in the Swedish Twin Registry and the Health and Retirement Study, respectively. To examine the channels that may underlie this association, we conduct mediation analyses with potential mediating variables that are measured in STR and HRS: cognitive function and several personality traits.

Our earlier GWAS of EA<sup>1</sup> provided evidence from STR that the association between the PGS and EA is mediated by cognitive performance. Here, we conduct a more powerful version of that analysis using the more predictive PGS made possible by the larger GWAS reported here. We also extend the earlier analysis by considering additional potential mediators, by including controls for potential confounding variables, by using an extended STR dataset (relative to the earlier paper), and by conducting the analyses in HRS in addition to STR.

### 6.1 Theory and Methods

We build on Baron and Kenny's (1986)<sup>2</sup> standard regression approach to mediation analysis, extending their framework to accommodate multiple mediating variables and covariates.

We estimate the following population regression model:

$$(1) \begin{aligned} E^*[Y|X, \mathbf{M}, \mathbf{C}] &= \theta_0 + \theta_1 X + \boldsymbol{\theta}'_2 \mathbf{M} + \boldsymbol{\theta}'_3 \mathbf{C} \\ E^*[M_k|X, \mathbf{C}] &= \beta_{0k} + \beta_{1k} X + \boldsymbol{\beta}'_{2k} \mathbf{C} \quad \text{for each } k = 1 \dots m, \end{aligned}$$

where  $E^*[A|B]$  denotes the linear projection of  $A$  onto  $B$ ,  $Y$  is the dependent variable of interest (in our case, *EduYears*),  $X$  is the independent variable (in our case, the PGS),  $\mathbf{M} = [M_1, \dots, M_m]$  is a vector of mediating variables, and  $\mathbf{C}$  is a vector of covariates (throughout, we use bolded capitalized letters to denote vectors). Supplementary Table 6.1 illustrates the main pathways of interest in the model. According to the model, a change in  $X$  induces a change in  $M_k$ , and a change in  $M_k$  in turns induces a change in  $Y$ . It is in that sense that  $\mathbf{M} = [M_1, \dots, M_m]$  mediates part of the relationship between  $X$  and  $Y$ .

We can re-write model (1) in reduced form as a function of  $X$  and  $\bar{\mathbf{C}}$  only:

$$\begin{aligned} E^*[Y|X, \mathbf{C}] &= E^*[E^*[Y|X, \mathbf{M}, \mathbf{C}]|X, \mathbf{C}] \\ &= E^*[Y|X, E^*[\mathbf{M}|X, \mathbf{C}], \mathbf{C}] \\ &= \theta_0 + \theta_1 X + \boldsymbol{\theta}'_2 E^*[\mathbf{M}|X, \mathbf{C}] + \boldsymbol{\theta}'_3 \mathbf{C} \\ &= \theta_0 + \theta_1 X + [\theta_{21}(\beta_{01} + \beta_{11} X + \boldsymbol{\beta}'_{21} \mathbf{C}) + \dots + \theta_{2m}(\beta_{0m} + \beta_{1m} X + \boldsymbol{\beta}'_{2m} \mathbf{C})] + \boldsymbol{\theta}'_3 \mathbf{C} \\ &= (\theta_0 + \theta_{21}\beta_{01} + \dots + \theta_{2m}\beta_{0m}) + (\theta_1 + \theta_{21}\beta_{11} + \dots + \theta_{2m}\beta_{1m})X + (\boldsymbol{\theta}'_3 + \theta_{21}\boldsymbol{\beta}'_{21} + \dots \\ &\quad + \theta_{2m}\boldsymbol{\beta}'_{2m})\mathbf{C} \\ &= \gamma_0 + \gamma_1 X + \boldsymbol{\gamma}'_2 \mathbf{C}, \end{aligned}$$

where  $\gamma_0 \equiv \theta_0 + \theta_{21}\beta_{01} + \dots + \theta_{2m}\beta_{0m}$ ,

$\gamma_1 \equiv \theta_1 + \theta_{21}\beta_{11} + \dots + \theta_{2m}\beta_{1m}$ ,

and  $\boldsymbol{\gamma}'_2 \equiv \boldsymbol{\theta}'_3 + \theta_{21}\boldsymbol{\beta}'_{21} + \dots + \theta_{2m}\boldsymbol{\beta}'_{2m}$ .

We refer to  $\gamma_1 = (\theta_1 + \theta_2' \beta_1)$  as the *total effect* of  $X$  on  $Y$ , to  $\theta_1$  as the *direct effect* of  $X$  on  $Y$ , to  $\theta_2' \beta_1 = \theta_{21} \beta_{11} + \dots + \theta_{2m} \beta_{1m}$  as the *total indirect effect*, and to  $\theta_{2k} \beta_{1k}$  as the *partial indirect effect* due to variable  $M_k$ . The total effect is equal to the sum of the direct effect and the total indirect effect. The direct effect captures the extent to which  $Y$  changes when  $X$  increased by one unit, with  $\mathbf{M}$  held fixed. The total indirect effect captures the extent to which  $Y$  changes when  $X$  is held fixed but the mediating variables are changed to the levels they would have attained had  $X$  increased by one unit; it quantifies the part of the total effect mediated by  $\mathbf{M}$ .

We wish to test:

- $H_0: \theta_1 = 0$  (direct effect: Does  $X$  have a direct effect on  $Y$  after controlling for  $\mathbf{M}$ ?);
- $H'_0: \theta_2' \beta_1 = 0$  (total indirect effect: Does  $\mathbf{M}$  mediate part of the effect of  $X$  on  $Y$ ?); and
- $H''_{0,k}: \theta_{2k} \beta_{1k} = 0, k = 1 \dots m$  (partial indirect effects: For each  $k$ , does  $M_k$  mediate the effect of  $X$  on  $Y$ ?).

## 6.2 Caveats

We emphasize that any conclusion drawn from these hypothesis tests is contingent on model (1) being correctly specified. (For a broader discussion of conceptual and identification issues in mediation analysis, see VanderWeele and Vansteelandt, 2009<sup>3</sup>.) Among other assumptions, the model posits that all effects are linear and that there are no interactions between  $\mathbf{M}$  and  $X$ . Crucially, the model also assumes that (i) any observed correlation between  $X$  and  $\mathbf{M}$  (after controlling for  $\mathbf{C}$ ) is due to a causal effect of  $X$  on  $\mathbf{M}$ , and (ii) any observed correlation between  $\mathbf{M}$  and  $Y$  (after controlling for  $\mathbf{C}$  and  $X$ ) is due to a causal effect of  $\mathbf{M}$  on  $Y$ , and not the other way around. In the analyses below, (i) is plausible ( $X$  is the PGS of educational attainment and is determined at conception), but (ii) is unlikely to always hold: many of the mediating variables were measured after the realization of educational attainment  $Y$ , so reverse causality is a possibility. To help mitigate this latter concern, we consider only mediating variables that are known to be relatively stable through life.

With these caveats in mind, below we estimate models in which  $X$  is the PGS for *EduYears* (hereafter, simply *PGS*),  $Y$  is educational attainment (*EduYears*), and  $\mathbf{M}$  contains a variable for cognitive performance and variables that measure personality traits. The analyses control for birth year and, where applicable, also gender.

## 6.3 Standard Errors for Indirect Effects

The standard errors of the direct effects are delivered directly from the regression output. To obtain the standard errors of the indirect effects, we use the delta method. Define  $f(\theta_2; \beta_1) \equiv \theta_2' \beta_1$ . Applying the delta method,

$$\widehat{Var}(\widehat{\theta}_2' \widehat{\beta}_1) = \widehat{Var}\left(f(\widehat{\theta}_2; \widehat{\beta}_1)\right) \approx \frac{\partial f(\widehat{\theta}_2; \widehat{\beta}_1)'}{\partial([\theta_2; \beta_1])} \widehat{Var}(\widehat{\theta}_2; \widehat{\beta}_1) \frac{\partial f(\widehat{\theta}_2; \widehat{\beta}_1)}{\partial([\theta_2; \beta_1])}$$



$$\begin{aligned}
&= [\hat{\beta}_1; \hat{\theta}_2]' \begin{pmatrix} \widehat{Var}(\hat{\theta}_2) & 0 \\ 0 & \widehat{Var}(\hat{\beta}_1) \end{pmatrix} [\hat{\beta}_1; \hat{\theta}_2] \\
&= \hat{\beta}_1' \widehat{Var}(\hat{\theta}_2) \hat{\beta}_1 + \hat{\theta}_2' \widehat{Var}(\hat{\beta}_1) \hat{\theta}_2.
\end{aligned}$$

The standard error is the square root of this quantity.

## 6.4 Data

We conduct mediation analyses based on this framework in two separate samples: the Swedish Twin Registry (STR) and the Health and Retirement Study (HRS). Both analyses examine the extent to which cognitive performance and a set of personality variables mediate the effect of *PGS* on *EduYears*.

The Swedish Twin Registry (STR) is a large, population-based twin registry<sup>4</sup>. 14,726 individuals born between 1911 and 1958, including slightly more than 7,000 males, were successfully genotyped as part of the TwinGene project. We conduct the analysis in the males-only subsample because data for cognitive performance, which comes from conscription records, are available only for males.

We use data from all males who have been successfully genotyped. Information on the sex of the participants is from the pedigree file. The participant's birth year is from the SALT Questionnaire Administration Data. Educational attainment information is from the 2005 data of Statistics Sweden and transformed into the *EduYears* variable using the ISCED scale. In cases where the education level from the 2005 data is missing, the level from the 1990 data is used.

We use three mediating variables from the STR: cognitive performance, Rotter locus of control, and behavioral inhibition. For cognitive performance, men in the sample were matched to conscription data provided by the Military Archives of Sweden. Men were required by law to participate in military conscription around the age of 18. We use the stanine scores of four subtests of logical, verbal, spatial, and technical ability. Following Rietveld et al. (2014)<sup>5</sup>, we use the first principal component of these four stanine scores as the measure of cognitive performance. The two personality variables come from the SALT survey, which was conducted between 2008 and 2010. As we discuss further below, the personality variables were measured long after individuals completed their education, thus raising concerns of reverse causality. The locus of control scale classifies individuals along a single dimension capturing the degree to which they feel they control the outcomes of events. The variable is a sum score, constructed from a questionnaire consisting of 12 questions. This score is coded such that a higher value corresponds to greater belief in one's own responsibility for one's fate. Behavioral inhibition is a subjective measure designed to capture how an individual responds to novel social situations. The behavioral inhibition variable is a sum score, constructed from a questionnaire consisting of 16 questions regarding inhibition. The scores are coded such that a higher value corresponds to more inhibition.

The Health and Retirement Study (HRS) is a longitudinal panel study that surveys a representative sample of approximately 20,000 Americans over the age of 50 every two years<sup>6</sup> (<http://hrsonline.isr.umich.edu/>). All individuals were born between 1900 and 1974, with more than 95% born in 1953 or earlier. DNA samples of a subsample of the HRS

participants have been collected between 2006 and 2008. As recommended in the HRS documentation, we restrict the analysis to 8,652 unrelated individuals of European ancestry to reduce confounding by ethnicity and close relatedness.

All variables, except for the Big Five personality traits, are retrieved from the RandHRS public dataset, version L. The *EduYears* variable is based on the highest degree attained. In cases where degree data are missing, we use self-reported years of education.

We use six mediating variables from the HRS: cognitive performance and a variable for each of the Big Five personality traits (Agreeableness, Neuroticism, Extraversion, Conscientious, Openness to Experience). In this dataset, all six mediating variables were measured long after education was completed, raising concerns of reverse causality, as we discuss below. The cognition measure is the average of measures from waves 3-10. In each of these waves, the cognition measure is a sum score of immediate and delayed word recall tasks, as well as counting, naming, and vocabulary tasks. The Big Five personality variables are the average of the personality measures in the RandHRS FAT files from the years 2006, 2008, and 2010. These measures are in turn based on 26 items in the 2006 and 2008 waves and 31 items in the 2010 wave.

For both STR and HRS, we used the polygenic score constructed using all SNPs (imputed as well as directly genotyped) as our *PGS* variable. Supplementary Information section 5 provides more details on how the polygenic scores were constructed. We standardized *PGS* as well as all mediating variables for the analysis. We present summary statistics for all variables used in these analyses in Supplementary Table 6.2.

## 6.5 Results

The results are reported in Supplementary Tables 6.3 and 6.4. In both the STR and the HRS, cognitive performance significantly mediates the effect of *PGS* on *EduYears*; in the HRS, Openness to Experience is also a significant mediator. The indirect effects for the other mediating variables are not significant<sup>s</sup>.

The results for cognitive performance are similar across STR and HRS. In both datasets, a one-standard deviation increase in *PGS* is associated with ~0.6-0.7 more years of education, and a one-standard deviation increase in cognitive performance is associated with ~0.15 more years of education. In both datasets, the direct effect ( $\theta_1$ ) of *PGS* on *EduYears* is ~0.3-0.4 and the total indirect effect ( $\beta_1\theta_2$ ) is ~0.19-0.31. This implies that a one-standard-deviation increase in *PGS* is associated with ~0.3-0.4 more years of education, keeping the mediating variables constant, and that changing the mediating variables to the levels they would have attained had *PGS* increased by one standard deviation (but keeping *PGS* fixed) increases years of education by ~0.19-0.31 years. Lastly, in both datasets, the partial indirect effect ( $\theta_{21}\beta_{11}$ ) of cognitive performance is large and very significant: the estimates are equal to 0.29 and 0.14—or 42% and 23% of the total effect ( $\gamma_1$ )—in STR and HRS, respectively.

---

<sup>s</sup> In STR, the indirect effects of locus of control and behavioral inhibition are significant, but only at the 10% level; in HRS, the indirect effect for conscientiousness is significant, but only at the 5% level. These *P*-values do not account for the multiple hypotheses we test, and these associations would not remain significant after correction for multiple hypotheses testing, so we ignore them in the remainder of this discussion.

The results also suggest that a one-standard deviation increase in Openness to Experience is associated with  $\sim 0.06$  more years of education, and the estimated partial indirect effect for Openness to Experience is equal to 0.04—or 7% of the total effect ( $\gamma_1$ ).

We note that the total effect ( $\gamma_1$ ) is slightly different from the sum of the direct effect ( $\theta_1$ ) and the total indirect effect ( $\beta_1\theta_2$ ) because there are differences in the sets of observations used in the various regressions due to missing data.

As noted above, an important caveat to these results is the potential concern of reverse causality. For instance, it is possible that *PGS* impacts *EduYears* independently of Openness to Experience or that *EduYears* also impacts Openness to Experience, in addition to or instead of the other way around.

In the STR results, reverse causality is unlikely to be much of a problem because many individuals completed their education at age 18 or later, and thus *EduYears* was determined after cognitive performance was measured. As a robustness check, we repeated the mediation analysis with the STR data after dropping individuals who completed less than 13 years of education—i.e., dropping those who finished their education prior to taking the cognitive performance tests. Reassuringly, we continue to find that cognitive performance is a strongly significant mediating variable.

Our result that cognitive performance mediates the relationship between *PGS* and *EduYears* reinforces our results with the polygenic scores from the earlier EA GWAS<sup>1</sup>. Our result that Openness to Experience is also a significant mediating variable is consistent with the literature on personality and educational attainment. Openness to Experience is often defined by two factors emphasizing distinct types of experience, *internal* (aesthetics, fantasy, feelings) and *external* (actions, ideas, values), and the latter has been found to be correlated with academic performance<sup>7,8</sup>.

## References

1. Rietveld, C. A. *et al.* GWAS of 126,559 individuals identifies genetic variants associated with educational attainment. *Science* **340**, 1467–1471 (2013).
2. Baron, R. M. & Kenny, D. A. The moderator–mediator variable distinction in social psychological research: Conceptual, strategic, and statistical considerations. *J. Pers. Soc. Psychol.* **51**, 1173–1182 (1986).
3. VanderWeele, T. & Vansteelandt, S. Conceptual issues concerning mediation, interventions and composition. *Stat. Interface* **2**, 457–468 (2009).
4. Lichtenstein, P. *et al.* The Swedish Twin Registry in the third millennium: an update. *Twin Res. Hum. Genet.* **9**, 875–882 (2012).
5. Rietveld, C. A. *et al.* Common genetic variants associated with cognitive performance identified using the proxy-phenotype method. *Proc. Natl. Acad. Sci. USA* **111**, 13790–4 (2014).
6. Juster, T. F. & Suzman, R. An overview of the Health and Retirement Study. *J. Hum. Resour.* **20**, 7–56 (1995).

7. Poropat, A. E. A meta-analysis of the five-factor model of personality and academic performance. *Psychol. Bull.* **135**, 322–338 (2009).
8. Von Stumm, S., Hell, B. & Chamorro-Premuzic, T. The hungry mind: intellectual curiosity is the third pillar of academic performance. *Perspect. Psychol. Sci.* **6**, 574–588 (2011).

## 7 Gene-environment Interactions

### 7.1 Introduction

Previous twin-based research has found that genetic effects on education vary across environmental contexts<sup>1,2</sup>, but few studies have examined interactions with directly measured EA-associated genotypes. Here, we provide an exploratory analysis of how the predictive power of our all-SNPs (including both imputed and directly genotyped SNPs) score varies by birth cohort in the Swedish Twins Registry (STR, birth year range 1929–1958). These cohorts made educational decisions in substantially different environments as Swedish institutions, norms and policy evolved over the course of the twentieth century, and hence changes in the effects of the PGS may reflect interactions with these environmental changes. Our cohort-based strategy for studying gene-by-environment (G×E) interactions is in the spirit of Rosenquist et al. (2015)<sup>3</sup>, who found that the strength of the well-known genetic association with body mass index varied by birth cohort.

### 7.2 Cohort Analysis

In our analyses, we divide our sample into six groups based on their year of birth. Each group spans five birth years, with the oldest spanning 1929-1933 and the youngest spanning 1954-1958. Within each group, we separately estimate the following regression:

$$EduYears_i = \beta_0 + \beta_1 PGS_i + \beta_2 Sex_i + \mu_i^b + \mu_i^{b,male} + \sum_{j=1}^{20} \beta_j^{pc} PC_{ij} + \varepsilon_i \quad (1)$$

where  $i$  indexes individuals and  $j$  indexes principal components of the genetic data. We use a PGS standardized to have mean 0 and standard deviation 1 based on the GWAS meta-analysis results excluding the STR. Since the STR was genotyped with two arrays (Supplementary Table 1.4), a natural concern is the possibility of batch effects that might drive differences in the PGS score (or its correlation with *EduYears*) across the two waves. We therefore only include in our all-SNP score SNPs with minor allele frequency above 1% and whose imputation accuracy exceeds 95% in both samples. This restriction does not meaningfully affect the predictive power of the PGS: we continue to find  $R^2 \approx 2.6\%$  in the full STR sample with this revised version of the PGS. In addition to the PGS, we control for sex, a vector of birth-year effects ( $\mu_i^b$ ), interactions between sex and birth-year effects ( $\mu_i^{b,male}$ ) and the first 20 principal components of the genetic data.

Supplementary Table 7.1 reports the estimated coefficient on PGS from each of these regressions. The results suggest that the association between the PGS and *EduYears* is decreasing across the cohorts. The coefficient estimate for those born in the late 1950s is less than 60 percent of the size of the corresponding estimate for those born in the early 1930s. This difference in effect size between the oldest and youngest cohorts is statistically significant: in a regression specification in which the PGS is interacted with separate indicators for the birth-year groups defined above and the oldest cohort is used as the omitted category, the interaction between the PGS and the youngest cohort has  $P$ -value 0.004. We also pool data on all cohorts and estimate an equation that includes a linear interaction between birth year (*BirthYr*, treated as a continuous variable) and the PGS:

$$EduYears_i = \beta_0 + \beta_1 PGS_i + \beta_{1a} PGS_i \times BirthYr_i + \beta_2 Sex_i + \mu_i^b + \mu_i^{b,male} + \sum_{j=1}^{20} \beta_j^{pc} PC_{ij} + \varepsilon_i \quad (2)$$

Column 7 of Supplementary Table 7.1 reports the estimated coefficient on PGS and the interaction between the PGS and *BirthYr*. To facilitate interpretation, the *BirthYr* variable is recoded to the 0-1 range, where 0 is equal to 1929 and 1 is equal to 1958. The interaction term is negative, statistically significant ( $P = 0.004$ ), and implies that the effect of the PGS for the oldest cohort in the sample (born in 1929) is almost twice as large as the effect among those born in 1958.

We also report the incremental  $R^2$  associated with the PGS for the specifications in Supplementary Table 7.1. In the younger cohorts, the distribution in education is compressed and hence has smaller variance, and the PGS explains a smaller (yet non-trivial) share of the variance than in the older cohorts. However, the decline in  $R^2$  is less pronounced than the decline of the regression coefficient.

### 7.3 Ascertainment Bias

A plausible concern is that the effects we observe could be explained by non-trivial ascertainment bias (also called sample-selection effects) due to differential mortality by education and the PGS score. Since individuals had to survive into the 2000s in order to be genotyped, the older birth cohorts in our analysis include individuals who lived longer on average than their cohort peers. If individuals with low values of the PGS and high educational attainment (or high values of the PGS and low attainment) faced higher mortality rates, then we could be finding a larger relationship between the PGS and *EduYears* in these cohorts because of differential mortality.

We believe this scenario is unlikely. A large literature finds that education is positively associated with longevity<sup>4</sup>. Thus, it seems plausible that the PGS exerts a positive effect on longevity (independent of education). In that case, individuals with low educational attainment and low values of the PGS would face the highest mortality rates in our population. In that case, ascertainment bias would work to attenuate the relationship between the PGS and *EduYears*. The bias would be greater for the older cohorts, causing us to *underestimate* the decline in the importance of genetic factors.

### 7.4 Discussion

The Swedish twin cohorts we study grew up during a period in which the Swedish schooling system underwent dramatic changes. Here, we describe some of these changes, provide descriptive analyses of how their timing relates to the falling predictive power of the score, and compare our results to those in the previous literature.

Sweden's most important reform during the period of study was introduced in the 1950s and 1960s when, like many other European countries, a new comprehensive schooling system was put in place. The main components of this reform were an extension of mandatory schooling from seven to nine years, elimination of the lower level in secondary school, and postponement of tracking from around 10 years of age until the age of 16. The Swedish comprehensive school reform was gradually rolled out across the country's municipalities

between 1949 and 1962 as part of an extensive evaluation program. Thus, for an extended period of time, pupils belonging to the same age cohort but living in different municipalities, and pupils living in the same municipality but from adjacent age cohorts, were assigned to different school systems<sup>5</sup>. The effects of the reform have been evaluated in a number of papers. One striking and robust finding is that the reform had a positive impact on the adult earnings of children from low-SES households<sup>6</sup>.

Another set of reforms sought to increase equality of outcomes and opportunity by increasing the availability of high schools, colleges, and universities. The expansion of the non-compulsory school system in Sweden gained momentum in the first decades of the twentieth century. The increasing geographic spread of lower secondary schools halted in the 1940s as the comprehensive school reform made this level of schooling saturated, whereas the expansion in the number of upper secondary schools continued well into the 1980s. Additionally, the availability of higher education increased sharply as new colleges and universities opened, first in the mid-1960s, and later following a major educational reform in 1977<sup>6,7</sup>.

The lower panel of Supplementary Table 7.1 presents some descriptive statistics relating the evolution of Swedish education reforms to the declining role of the PGS. The first row in the lower panel presents the share of pupils in each birth-cohort group that was exposed to the comprehensive school reform<sup>t</sup>. The oldest cohort that was exposed to the reform program was born in 1938 (and started the fifth grade in 1949). From a modest start, where only a handful of municipalities were selected for the first year of assessment (1949/1950), the number of municipalities joining the evaluation program grew steadily. The youngest cohort in which some pupils still attended the old school system was born in 1955 (i.e., they started school in 1962 when the parliament decided to permanently introduce the nine-year comprehensive school).

The following three rows report average distance between the individual's home and nearest (i) lower secondary school, (ii) upper secondary school, and (iii) college or university. These indicators are based on recently collected data that have not previously been used<sup>u</sup>. We note several features of these data. First, the average distance to secondary schools and colleges and universities decreased significantly over the time period during which the individuals in the STR sample came of school age. Second, the initiation of the comprehensive school reform signaled the gradual dismantling of the old system with a lower secondary stage. Third, as discussed above, the expansion of the number of lower secondary schools preceded the expansion of upper secondary schools and, later, colleges and universities<sup>v</sup>.

---

<sup>t</sup> To construct a reform-status indicator for each individual in our sample, we use information on birth municipality for those born 1938 to 1942 as a proxy for home municipality when aged 13. For those born during 1943 to 1958, we instead use home municipality according to the census in 1960. We are grateful to Helena Holmlund for sharing the data and code used for creating this indicator<sup>5</sup>.

<sup>u</sup>The distance measures are constructed using information about the birth parish of the individuals in the STR sample in combination with data on the presence and exact location of lower secondary schools, upper secondary schools, and colleges/universities in each year from 1905 to 2000 across the approximately 2,500 parishes in Sweden. To create the distance measures, we make the following assumptions about the individuals: (i) the individuals start lower secondary school at age 13, secondary school at age 16, and college/university at age 20; (ii) the birth parish is the same as the residential parish when aged 13, 16, and 20; and (iii) all individuals in a parish are assumed to live at the location of the parish church. Given these assumptions, the lower secondary school distance score for individual  $i$  born in year  $t$  is defined as the distance between the location of the birth parish church and the location of the nearest lower secondary school in year  $t+13$ . The distance scores for upper secondary school and college/university are defined analogously.

<sup>v</sup> Due to the use of birth parish as the basis for the distance measures, there is an artificial increase in the average distance to the nearest school for individuals born 1947 and later. Until 1946, birth parish is defined as the parish in which an individual is born in the Swedish registers. Children born from 1947 onward were instead assigned the mother's residential parish as

Extended Data Fig. 10 provides a graphical illustration of the timing of the school reforms and estimated impact of the PGS. The solid line in each graph displays the regression coefficients from five-year rolling regressions of *EduYears* on the PGS (left axis in each panel), with the shaded area showing the 95% confidence intervals. The dashed lines show the share of individuals not affected by the comprehensive school reform (upper-left graph, right axis) and the average distance to nearest junior high school (upper right-graph, right axis), nearest high school (lower-left graph, right axis), and nearest college/university (lower-right graph, right axis). Although these results may be relevant for understanding the falling predictive power of the score, we caution that there are myriads of mechanisms that could organize the data equally well.

A recent meta-analysis of twins from ten different countries and whose birth years span over a century found clear evidence that the heritability of EA varies by birth cohort and country.<sup>1</sup> The declining predictive power we find is seemingly at odds with birth-cohort effects on heritability previously reported for Norway<sup>2</sup> and the overall tendency observed in the recent meta-analysis of twins<sup>1</sup>. Resolving the causes of this apparent discrepancy is beyond the scope of our study, but below we propose some hypotheses and some potential ways to investigate them.

First, the  $R^2$  from a PGS is a fundamentally different estimand than the  $h^2$  of a twin study, which measures the proportion of variance explained by genetic factors as a whole. In principle, the two need not evolve similarly over time. Even if genetic factors as a whole are similarly important across STR birth cohorts, *different* genetic factors could matter for different birth cohorts. The PGS is constructed using weights obtained by meta-analyzing a heterogeneous set of cohorts. If the discovery-sample weights are closer to the population weights in the older STR cohorts than the population weights in the younger STR cohorts, it would result the pattern of declining predictive power we observe in the data. Under this hypothesis, we expect the genetic correlation between our discovery sample (omitting STR cohorts) and the older STR cohort to be higher than the genetic correlation with the younger cohort. Unfortunately, the two cohorts are too small to allow a well-powered test of this hypothesis.

Second, the divergent results could reflect differences between Sweden and Norway in the secular environmental changes that occurred during the period. The two countries started in significantly different economic conditions and experienced different growth trajectories over this period. Sweden had a significantly higher level of GDP per capita in 1930 (\$4238 vs. \$3627, measured in 1990 US Dollars)<sup>8</sup>, but the gap narrowed substantially during our period of study. Additionally, Sweden and Norway faced different trends in educational attainment, partly due to differing policies. For example, whereas Sweden made seven years of schooling compulsory for children in 1936, Norway implemented such reforms much earlier. While educational attainment grew steadily in Sweden over the twentieth century, Norway followed a more erratic path<sup>9</sup>. To seriously explore the relevance of these differences for the declining explanatory power of the PGS, it would be necessary to develop a more formal theoretical framework that makes predictions about how these institutional factors impact the  $R^2$  of a PGS or  $h^2$  and then put those predictions to an empirical test.

---

birth parish. Since the number of mothers who gave birth at a maternity ward grew steadily during the first half of the twentieth century, and most maternity wards were located in city parishes with a high likelihood of also containing or being close to secondary schools (and, to a lesser extent, colleges and universities), the decrease in the distance to the nearest school is slightly but increasingly overstated until 1947.



The exploratory analyses we have reported here serve two purposes. First, at a general level, our analyses provide some molecular-genetic evidence of treatment-effect heterogeneity by birth cohort. We do not think it is appropriate to make general inferences about how the PGS interacts with birth cohort from a study of a single country. Second, our analyses help lay a foundation for future, rigorous studies on G×E interactions. Despite enormous enthusiasm, progress in molecular G×E studies of behavioral traits has been disappointing<sup>10</sup>. There is now strong evidence that the false-positive rate in the G×E literature is high: systematic evaluations find that only about one in four positive findings replicate and that there is clear evidence of publication bias<sup>4</sup>. The editor of the field journal *Behavior Genetics* recently concluded that the G×E literature is “full of reports that have not stood up to rigorous replication”<sup>11</sup>. It is widely understood that a major cause of the disappointing replication record is that most studies have been dramatically underpowered<sup>10,12</sup>. The PGS used here may help mitigate this problem, as it has explanatory power at least an order of magnitude greater than that of single polymorphisms whose variation has been credibly linked to behavioral phenotypes. Therefore, the PGS we develop in this paper may prove to be valuable for follow-up studies examining in greater detail how, and ultimately why, different environmental factors amplify or dampen genetic effects.

## References

1. Branigan, A. R., McCallum, K. J. & Freese, J. Variation in the heritability of educational attainment: an international meta-analysis. *Soc. Forces* **92**, 109–140 (2013).
2. Heath, A., Berg, K., Eaves, L. & Solaas, M. Education policy and the heritability of educational attainment. *Nature* **314**, 734–736 (1985).
3. Rosenquist, J. N. *et al.* Cohort of birth modifies the association between FTO genotype and BMI. *Proc. Natl. Acad. Sci. USA* **112**, 354–359 (2015).
4. Cutler, D. M., Lleras-Muney, A. & Vogl, T. in *Oxford Handb. Heal. Econ.* (Glied, S. & Smith, P. C.) 124–163 (Oxford Univ. Press, 2011).
5. Holmlund, H. *A Researcher’s Guide to the Swedish Compulsory School Reform*. <[http://eprints.lse.ac.uk/19382/1/A\\_Researcher%27s\\_Guide\\_to\\_the\\_Swedish\\_Compulsory\\_School\\_Reform.pdf](http://eprints.lse.ac.uk/19382/1/A_Researcher%27s_Guide_to_the_Swedish_Compulsory_School_Reform.pdf)> (2008).
6. Meghir, C. & Palme, M. Educational reform, ability, and family background. *Am. Econ. Rev.* **95**, 414–424 (2005).
7. Erikson, R. & Jonsson, J. O. *Ursprung och utbildning. Social snedrekrytering till högre studier. Huvudbetänkande av Utredningen om den sociala snedrekryteringen till högre studier, SOU 1993:85.* (Fritzes offentliga publikationer, 1993).
8. The Maddison-Project, <http://www.ggcd.net/maddison/maddison-project/home.htm>, (2013).
9. Lindbekk, T. School reforms in Norway and Sweden, and the redistribution of educational attainments. *Scand. J. Educ. Res.* **37**, 129–149 (1993).

10. Duncan, L. E. & Keller, M. C. A Critical review of the first 10 years of candidate gene-by-environment interaction research in psychiatry. *Am. J. Psychiatry* **168**, 1041–1049 (2011).
11. Hewitt, J. K. Editorial policy on candidate gene association and candidate gene-by-environment interaction studies of complex traits. *Behav. Genet.* **42**, 1–2 (2012).
12. Rietveld, C. A. *et al.* Replicability and robustness of GWAS for behavioral traits. *Psychol. Sci.* **25**, 1975–1986 (2014).

# Supplementary Notes

---

## 8 Author Contributions

Daniel Benjamin, David Cesarini, Tõnu Esko, Magnus Johannesson, Philipp Koellinger, and Peter Visscher designed and oversaw the study.

The lead analyst responsible for quality control and meta-analyses was Aysu Okbay. She was assisted by Guo-Bo Chen, Mark Fontana, Tune Pers, and Niels Rietveld.

Jonathan Beauchamp, Patrick Turley, Peter Visscher, and Jian Yang developed and applied methods to test for population stratification. Zhihong Zhu and Jian Yang provided guidelines to the cohorts for conducting mixed linear model association analyses.

The genetic overlap analyses were conducted by Mark Fontana and Patrick Turley, and Jonathan Beauchamp and Patrick Turley developed the analyses of new and existing methods.

Tõnu Esko and James Lee organized and oversaw the bioinformatics analyses, which were conducted by Jonathan Beauchamp (LD Score partitioning), Johannes H. Brandsma (enrichment by genes containing de novo causal mutations), Valur Emilsson (brain eQTL), Mark Fontana (LD Score partitioning), Lude Franke (blood eQTL), Fleur Meddens (Gene Network, HaploReg, and GWAS catalog look-ups), Geert Meddens (Gene Network look-ups), Tune Pers (DEPICT, temporal expression), Joe Pickrell (fgwas), Raymond A. Poot (enrichment by genes containing de novo causal mutations), Pascal Timshel (temporal expression, enrichment by genes containing de novo causal mutations), Ronald de Vlaming (GREML partitioning), and Harm-Jan Westra (blood eQTL). James Lee led the writing of the results of the bioinformatics analyses.

Polygenic-prediction analyses were conducted by Jonathan Beauchamp, Mark Fontana, Peter Visscher, and Jian Yang.

Jonathan Beauchamp conducted the mediation analyses.

Dalton Conley, Steven F. Lehrer, Karl-Oskar Lindgren, Sven Oskarsson, and Kevin Thom conducted the analysis of gene×environment interactions.

Replication analyses in the UK Biobank were carried out by Mark Fontana and Niels Rietveld.

Besides the contributions explicitly listed above, Ronald de Vlaming, Mark Fontana, James Lee, and Niels Rietveld conducted additional analyses for several subsections, including quality control, population stratification, and genetic overlap. Niels Rietveld prepared the

majority of figures. Olga Rostapshova helped with coordinating among the participating cohorts.

The Advisory Board of the SSGAC (Dalton Conley, George Davey Smith, Tõnu Esko, Albert Hofman, Robert Krueger, David Laibson, Sarah Medland, Michelle Meyer, and Peter Visscher) supported the project in a variety of important ways.

All authors contributed to and critically reviewed the manuscript. Jonathan Beauchamp, Jake Gratten, James Lee, and Patrick Turley made especially major contributions to the writing and editing.

| <b>Cohort</b> | <b>Author</b>                 | <b>Study Design &amp; Managemt.</b> | <b>Data Collection</b> | <b>Genotyping</b> | <b>Genotype Prep.</b> | <b>Phenotype Prep.</b> | <b>Data Analysis</b> | <b>Wrote Manuscript</b> |
|---------------|-------------------------------|-------------------------------------|------------------------|-------------------|-----------------------|------------------------|----------------------|-------------------------|
| ACPRC         | Antony Payton                 | X                                   | X                      | X                 | X                     |                        | X                    |                         |
| ACPRC         | Michael A. Horan              | X                                   | X                      |                   |                       |                        |                      |                         |
| ACPRC         | Willaim E.R. Ollier           | X                                   | X                      |                   |                       |                        |                      |                         |
| ACPRC         | Neil Pendleton                | X                                   | X                      |                   | X                     | X                      | X                    |                         |
| AGES          | Albert V. Smith               |                                     |                        |                   | X                     | X                      | X                    |                         |
| AGES          | Lenore J. Launer              | X                                   |                        |                   |                       | X                      |                      |                         |
| AGES          | Tamara B. Harris              | X                                   |                        |                   |                       | X                      |                      |                         |
| AGES          | Vilmundur Gudnason            | X                                   |                        |                   |                       | X                      |                      |                         |
| ALSPAC        | Beate St Pourcain             |                                     |                        |                   |                       | X                      | X                    |                         |
| ALSPAC        | Nicholas J. Timpson           |                                     |                        |                   |                       | X                      |                      |                         |
| ALSPAC        | David M. Evans                |                                     |                        |                   | X                     |                        |                      |                         |
| ALSPAC        | Susan M. Ring                 |                                     |                        | X                 |                       |                        |                      |                         |
| ALSPAC        | George McMahon                |                                     |                        |                   | X                     |                        |                      |                         |
| ALSPAC        | George Davey Smith            |                                     | X                      |                   |                       |                        |                      |                         |
| ASPS          | Edith Hofer                   |                                     |                        |                   |                       | X                      | X                    |                         |
| ASPS          | Katja E. Petrovic             |                                     |                        |                   |                       | X                      |                      |                         |
| ASPS          | Helena Schmidt                |                                     |                        | X                 | X                     |                        |                      |                         |
| ASPS          | Reinhold Schmidt              | X                                   | X                      |                   |                       |                        |                      |                         |
| BASE II       | Tian Liu                      | X                                   |                        | X                 | X                     |                        | X                    |                         |
| BASE II       | Ilja Demuth                   |                                     | X                      |                   |                       | X                      |                      |                         |
| BASE II       | Peter Eibich                  |                                     | X                      |                   |                       | X                      |                      |                         |
| BASE II       | Martin Kroh                   |                                     | X                      |                   |                       |                        |                      |                         |
| BASE II       | Elisabeth Steinhagen-Thiessen |                                     | X                      |                   |                       |                        |                      |                         |
| BASE II       | Lars Bertram                  | X                                   | X                      | X                 | X                     |                        | X                    |                         |
| CoLaus        | Rico Rueedi                   |                                     |                        |                   | X                     | X                      | X                    |                         |
| CoLaus        | Pedro Marques-Vidal           | X                                   |                        |                   |                       | X                      | X                    |                         |
| CoLaus        | Zoltan Kutalik                |                                     |                        | X                 | X                     |                        | X                    |                         |

|                 |                        |   |   |   |   |   |   |   |
|-----------------|------------------------|---|---|---|---|---|---|---|
| CoLaus          | Peter Vollenweider     | X | X | X |   |   |   |   |
| COPSAC2000      | Tarunveer S. Ahluwalia |   |   |   | X | X | X |   |
| COPSAC2000      | Johannes Waage         |   |   |   | X |   |   |   |
| COPSAC2000      | Klaus Bønnelykke       | X | X | X |   |   |   |   |
| COPSAC2000      | Hans Bisgaard          | X | X | X |   |   |   |   |
| CROATIA-Korčula | Jonathan Marten        |   |   |   | X |   | X |   |
| CROATIA-Korčula | Ivana Kolcic           |   | X |   |   |   |   |   |
| CROATIA-Korčula | Igor Rudan             | X |   |   |   |   |   |   |
| CROATIA-Korčula | Ozren Polasek          | X | X |   |   | X |   |   |
| CROATIA-Split   | Veronique Vitart       | X |   |   |   |   |   |   |
| CROATIA-Vis     | Alan F. Wright         | X |   |   | X |   |   |   |
| deCODE          | Gudmar Thorleifsson    |   |   |   |   |   | X |   |
| deCODE          | Gyda Bjornsdottir      |   |   |   |   | X |   |   |
| deCODE          | Bjarni Gunnarsson      |   |   |   |   |   | X |   |
| deCODE          | Bjarni V. Halldórsson  |   |   |   |   |   | X |   |
| deCODE          | Augustine Kong         |   |   |   |   |   | X |   |
| deCODE          | Unnur Thorsteinsdottir | X |   | X | X |   |   |   |
| deCODE          | Kari Stefansson        | X |   |   |   |   |   |   |
| DHS             | Juergen Wellmann       |   |   |   |   | X | X |   |
| DHS             | Klaus Berger           | X | X |   |   | X | X |   |
| DHS             | Peter Lichtner         |   |   | X |   |   |   |   |
| EGCUT           | Evelin Mihailov        |   |   |   |   |   | X |   |
| EGCUT           | Reedik Mägi            |   |   |   |   |   | X |   |
| EGCUT           | Lili Milani            |   |   |   | X |   |   |   |
| EGCUT           | Andres Metspalu        | X | X |   |   | X |   |   |
| EGCUT           | Tõnu Esko              | X |   |   |   |   | X | X |
| ERF             | Sven J. van der Lee    |   |   |   |   | X | X |   |
| ERF             | Najaf Amin             |   |   |   | X | X |   |   |
| ERF             | Cornelia M. van Duijn  | X | X | X | X |   |   |   |
| FamHS           | Aldi T. Kraja          |   |   |   | X |   | X |   |

|         |                        |   |   |   |   |   |   |  |
|---------|------------------------|---|---|---|---|---|---|--|
| FamHS   | Mary F. Feitosa        | X |   |   | X |   | X |  |
| FamHS   | Michael A. Province    | X |   | X |   |   |   |  |
| FamHS   | Ingrid B. Borecki      | X |   | X |   |   |   |  |
| FINRISK | Natalia Tsernikova     |   |   |   | X |   | X |  |
| FINRISK | Niina Eklund           |   |   |   | X | X | X |  |
| FINRISK | Veikko Salomaa         | X | X | X |   |   |   |  |
| FINRISK | Markus Perola          | X |   | X | X |   |   |  |
| FTC     | Richa Gupta            |   |   |   |   |   | X |  |
| FTC     | Antti Latvala          |   |   |   |   | X |   |  |
| FTC     | Anu Loukola            |   |   | X | X |   | X |  |
| FTC     | Jaakko Kaprio          |   | X |   |   |   | X |  |
| GS      | Jennifer E. Huffman    |   |   |   | X | X | X |  |
| GS      | Lynne J. Hocking       | X | X |   |   |   |   |  |
| GS      | David J. Porteous      | X | X |   |   |   |   |  |
| GS      | Riccardo E. Marioni    |   |   |   |   | X |   |  |
| GS      | Blair H. Smith         | X | X |   |   |   |   |  |
| GS      | Caroline Hayward       |   |   | X | X | X | X |  |
| GOYA    | Tarunveer S. Ahluwalia |   |   |   | X | X | X |  |
| GOYA    | Lavinia Paternoster    |   |   | X | X |   |   |  |
| GOYA    | George Davey. Smith    |   |   | X |   |   |   |  |
| GOYA    | Thorkild I.A. Sørensen | X | X | X |   |   |   |  |
| GRAPHIC | Leanne M. Hall         |   |   |   |   |   | X |  |
| GRAPHIC | Christopher P. Nelson  |   |   |   | X |   | X |  |
| GRAPHIC | Martin D. Tobin        | X | X |   |   |   |   |  |
| GRAPHIC | Nilesh J. Samani       | X | X | X | X | X |   |  |
| H2000   | Natalia Pervjakova     | X | X |   |   |   | X |  |
| H2000   | Tomi Mäki-Opas         | X | X |   |   |   | X |  |
| H2000   | Seppo Koskinen         | X | X |   |   |   |   |  |
| H2000   | Markus Perola          | X | X |   |   |   | X |  |
| HBCS    | Jari Lahti             |   | X |   | X |   | X |  |

|            |                        |   |   |   |   |   |   |  |
|------------|------------------------|---|---|---|---|---|---|--|
| HBCS       | Aarno Palotie          | X |   | X | X |   |   |  |
| HBCS       | Antti-Pekka Sarin      |   |   | X | X |   |   |  |
| HBCS       | Katri Räikkönen        | X | X |   |   | X |   |  |
| HBCS       | Johan G. Eriksson      | X | X |   |   | X |   |  |
| HCS        | Christopher Oldmeadow  |   |   |   |   | X | X |  |
| HCS        | Elizabeth G. Holliday  |   |   |   | X |   |   |  |
| HCS        | Rodney J. Scott        |   |   | X |   |   |   |  |
| HCS        | John R. Attia          | X |   |   |   |   |   |  |
| HNRS       | Börge Schmidt          |   |   |   | X | X | X |  |
| HNRS       | Andreas Forstner       |   |   | X |   |   |   |  |
| HNRS       | Lewin Eisele           |   |   |   | X |   | X |  |
| HNRS       | Karl-Heinz Jöckel      | X | X |   |   |   |   |  |
| HRS        | Wei Zhao               |   |   | X | X |   | X |  |
| HRS        | Jennifer A. Smith      |   |   | X |   |   | X |  |
| HRS        | Jessica D. Faul        |   | X | X |   | X |   |  |
| HRS        | Erin B. Ware           |   |   |   |   | X |   |  |
| HRS        | Sharon LR. Kardia      |   |   | X |   |   |   |  |
| HRS        | David R. Weir          | X | X | X |   |   |   |  |
| Hypergenes | Erika Salvi            |   |   | X |   |   | X |  |
| Hypergenes | Jan A. Staessen        | X | X |   |   | X |   |  |
| Hypergenes | Francesco P. Cappuccio | X | X |   |   | X |   |  |
| Hypergenes | Daniele Cusi           | X | X |   |   | X |   |  |
| INGI-CARL  | Giorgia Giroto         |   | X |   |   | X |   |  |
| INGI-CARL  | Diego Vozzi            |   | X |   |   | X |   |  |
| INGI-CARL  | Sheila Ulivi           |   | X | X |   |   |   |  |
| INGI-CARL  | Nicola Pirastu         |   | X |   |   | X | X |  |
| INGI-FVG   | Dragana Vuckovic       |   |   |   |   |   | X |  |
| INGI-FVG   | Ilaria Gandin          |   |   |   |   |   | X |  |
| INGI-FVG   | Antonietta Robino      |   | X |   |   |   | X |  |
| INGI-FVG   | Paolo Gasparini        |   | X |   |   |   |   |  |



|           |                          |   |   |   |   |   |   |  |
|-----------|--------------------------|---|---|---|---|---|---|--|
| KORA      | Clemens Baumbach         |   |   |   |   |   | X |  |
| KORA      | Konstantin Strauch       |   | X |   |   |   |   |  |
| KORA      | Thomas Meitinger         |   | X |   |   |   |   |  |
| KORA      | Christa Meisinger        |   | X |   |   |   |   |  |
| KORA      | Christian Gieger         |   | X |   |   |   |   |  |
| LBC       | Sarah E. Harris          |   | X | X | X | X | X |  |
| LBC       | Gail Davies              |   |   | X | X | X |   |  |
| LBC       | David CM. Liewald        |   |   | X | X |   |   |  |
| LBC       | Ian J. Deary             |   | X | X |   |   |   |  |
| LifeLines | Peter J. van der Most    |   |   |   |   |   | X |  |
| LifeLines | Judith M. Vonk           |   |   |   | X | X |   |  |
| LifeLines | Behrooz Z. Alizadeh      | X |   |   | X | X |   |  |
| LifeLines | Ute Bultmann             | X |   |   |   | X |   |  |
| LifeLines | Behrooz Z. Alizadeh      | X | X | X | X | X |   |  |
| LifeLines | Rudolf A. de Boer        | X | X | X | X | X |   |  |
| LifeLines | H Marike. Boezen         | X | X | X | X | X |   |  |
| LifeLines | Marcel Bruinenberg       | X | X | X | X | X |   |  |
| LifeLines | Lude Franke              | X | X | X | X | X |   |  |
| LifeLines | Pim van. der Harst       | X | X | X | X | X |   |  |
| LifeLines | Hans L. Hillege          | X | X | X | X | X |   |  |
| LifeLines | Melanie M. van der Klauw | X | X | X | X | X |   |  |
| LifeLines | Gerjan Navis             | X | X | X | X | X |   |  |
| LifeLines | Johan Ormel              | X | X | X | X | X |   |  |
| LifeLines | Dirkje S. Postma         | X | X | X | X | X |   |  |
| LifeLines | Judith G.M. Rosmalen     | X | X | X | X | X |   |  |
| LifeLines | Joris P. Slaets          | X | X | X | X | X |   |  |
| LifeLines | Harold Snieder           | X | X | X | X | X |   |  |
| LifeLines | Ronald P. Stolk          | X | X | X | X | X |   |  |
| LifeLines | Bruce H.R. Wolffenbuttel | X | X | X | X | X |   |  |
| LifeLines | Cisca Wijmenga           | X | X | X | X | X |   |  |

|       |                           |   |   |   |   |   |   |   |
|-------|---------------------------|---|---|---|---|---|---|---|
| MCTFR | James J. Lee              |   |   |   |   | X | X | X |
| MCTFR | Michael B. Miller         |   |   | X | X |   | X |   |
| MCTFR | Matt McGue                | X | X | X | X | X |   |   |
| MCTFR | William G. Iacono         | X | X | X | X |   |   |   |
| MCTFR | Jaime Derringer           |   |   |   |   | X | X |   |
| MGS   | Christiaan de Leeuw       |   |   |   | X |   | X |   |
| MGS   | Jianxin Shi               |   |   |   | X |   | X |   |
| MGS   | Alan R. Sanders           | X | X | X | X | X |   |   |
| MGS   | Douglas F. Levinson       | X | X |   | X | X |   |   |
| MGS   | Danielle Posthuma         |   |   |   | X | X | X |   |
| MGS   | Pablo V. Gejman           | X | X | X | X | X |   |   |
| MOBA  | Jonas Bacelis             |   |   |   | X | X | X |   |
| MOBA  | Astanand Jugessur         |   |   |   | X | X |   |   |
| MOBA  | Ronny Myhre               |   |   | X |   | X |   |   |
| MOBA  | Bo Jacobsson              |   |   | X |   |   |   |   |
| NBS   | Tessel E. Galesloot       |   |   |   |   |   | X |   |
| NBS   | Lambertus A.L.M. Kiemeney |   | X | X |   |   |   |   |
| NBS   | Barbara Franke            |   | X | X |   |   |   |   |
| NESDA | Wouter J. Peyrot          |   |   |   | X | X | X |   |
| NESDA | Yuri Milaneschi           |   |   |   | X | X |   |   |
| NESDA | Brenda WJH. Penninx       | X | X | X | X | X |   |   |
| NFBC  | Kadri Haljas              |   |   |   |   | X | X |   |
| NFBC  | Jari M. Lahti             |   |   |   |   | X | X |   |
| NFBC  | Antti-Pekka Sarin         |   |   | X | X |   |   |   |
| NFBC  | Marika A. Kaakinen        |   | X | X | X |   |   |   |
| NFBC  | Marjo-Riitta Järvelin     | X | X |   |   |   |   |   |
| NTR   | Abdel Abdellaoui          |   |   |   | X |   | X |   |
| NTR   | Jouke-Jan Hottenga        |   |   | X | X |   |   |   |
| NTR   | Gonneke Willemsen         |   | X |   |   | X |   |   |
| NTR   | Dorret I. Boomsma         | X | X |   |   |   |   |   |

|          |                       |   |   |   |   |   |   |   |
|----------|-----------------------|---|---|---|---|---|---|---|
| OGP      | Maria Pina Concas     |   |   |   |   |   | X |   |
| OGP      | Ginevra Biino         | X | X |   |   | X | X |   |
| OGP      | Simona Vaccargiu      |   | X | X | X |   |   |   |
| OGP      | Mario Pirastu         | X |   |   |   |   |   |   |
| ORCADES  | Katharina E. Schraut  |   |   |   |   |   | X |   |
| ORCADES  | Peter K. Joshi        |   |   |   | X | X | X |   |
| ORCADES  | Harry Campbell        | X | X | X |   |   |   |   |
| ORCADES  | James F. Wilson       | X | X | X |   |   |   |   |
| PREVEND  | Niek Verweij          |   |   |   | X | X | X |   |
| PREVEND  | Pim van der Harst     | X | X | X |   |   |   |   |
| QIMR     | Penelope A. Lind      |   |   |   |   | X | X |   |
| QIMR     | Grant W. Montgomery   | X |   | X |   |   |   |   |
| QIMR     | Dale R. Nyholt        |   | X |   | X |   |   |   |
| QIMR     | Pamela A. Madden      | X | X | X |   |   |   |   |
| QIMR     | Andrew C. Heath       | X | X | X |   |   |   |   |
| QIMR     | Sarah E. Medland      |   |   |   | X | X | X |   |
| QIMR     | Nicholas G. Martin    | X | X | X |   |   |   |   |
| RS       | Cornelius A. Rietveld |   |   |   | X | X | X | X |
| RS       | Frank J.A. van Rooij  |   | X |   |   | X |   |   |
| RS       | Fernando Rivadeneira  |   |   | X | X |   |   |   |
| RS       | Patrick J.F. Groenen  | X |   |   |   |   |   |   |
| RS       | Albert Hofman         | X | X |   |   |   |   |   |
| RS       | A. Roy Thurik         | X |   |   |   |   |   |   |
| RS       | Henning Tiemeier      | X | X |   |   |   |   |   |
| RS       | André G. Uitterlinden | X | X | X | X |   |   |   |
| ROSMAP   | Jingyun Yang          |   |   |   | X |   | X |   |
| ROSMAP   | Patricia A. Boyle     |   | X |   |   | X |   |   |
| ROSMAP   | Philip L. De Jager    |   |   | X | X |   |   |   |
| ROSMAP   | David A. Bennett      | X | X |   |   |   |   |   |
| SardiNIA | Yong Qian             |   |   |   |   |   | X |   |

|                    |                         |   |   |   |   |   |   |   |
|--------------------|-------------------------|---|---|---|---|---|---|---|
| SardiNIA           | Jun Ding                |   |   |   |   |   | X |   |
| SardiNIA           | Antonio Terracciano     | X | X |   |   | X | X |   |
| SardiNIA           | Francesco Cucca         | X | X | X | X |   |   |   |
| SardiNIA           | David Schlessinger      | X | X | X |   |   |   |   |
| SHIP               | Alexander Teumer        |   |   |   | X |   | X |   |
| SHIP               | Sebastian E. Baumeister | X | X |   |   | X | X |   |
| SHIP               | Henry Völzke            | X | X |   |   | X |   |   |
| SHIP               | Wolfgang Hoffmann       | X | X |   |   |   |   |   |
| SHIP-TREND         | Georg Homuth            |   |   | X | X |   |   |   |
| SHIP-TREND         | Uwe Völker              |   |   | X | X |   |   |   |
| SHIP-TREND         | Hans-Jürgen Grabe       | X | X |   |   |   |   |   |
| STR                | Robert Karlsson         |   | X | X | X |   |   |   |
| STR                | Nancy L. Pedersen       | X | X |   |   | X |   |   |
| STR                | Paul Lichtenstein       | X | X |   |   | X |   |   |
| STR                | Patrik K.E. Magnusson   | X | X | X | X | X |   | X |
| STR                | Sven Oskarsson          |   | X |   |   |   | X | X |
| STR                | Magnus Johannesson      | X | X |   |   | X |   |   |
| STR                | David Cesarini          | X | X |   | X | X | X | X |
| STR                | Cornelius A. Rietveld   |   |   |   | X | X | X | X |
| STR                | Sarah E. Medland        |   |   |   |   |   | X |   |
| STR                | Penelope A. Lind        |   |   |   |   |   | X |   |
| THISEAS            | Ioanna P. Kalafati      |   | X |   |   | X | X |   |
| THISEAS            | Stavroula Kanoni        |   |   |   | X |   |   |   |
| THISEAS            | Panos Deloukas          |   |   | X |   |   |   |   |
| THISEAS            | George V. Dedoussis     | X |   |   |   |   |   |   |
| TwinsUK            | Massimo Mangino         |   |   |   | X |   | X |   |
| TwinsUK            | Lydia Quaye             |   |   |   |   | X | X |   |
| TwinsUK            | Cristina Venturini      |   |   | X | X |   |   |   |
| TwinsUK            | Tim D. Spector          | X | X | X |   |   |   |   |
| 58BC-WTCCC and DIL | Momoko Horikoshi        |   |   |   |   |   | X |   |

|                    |                            |   |   |   |   |   |   |  |
|--------------------|----------------------------|---|---|---|---|---|---|--|
| 58BC-WTCCC and DIL | Christine Power            | X | X |   |   | X |   |  |
| 58BC-WTCCC and DIL | Elina Hyppönen             | X | X |   |   | X |   |  |
| YFS                | Olli Raitakari             | X | X |   |   | X | X |  |
| YFS                | Mika Kähönen               | X | X |   |   | X |   |  |
| YFS                | Liisa Keltigangas-Järvinen | X | X |   |   | X |   |  |
| YFS                | Terho Lehtimäki            | X | X | X | X | X | X |  |
| 23andMe, Inc.      | Nicholas A. Furlotte       |   |   |   |   |   | X |  |
| 23andMe, Inc.      | Joyce Y. Tung              | X |   |   |   |   |   |  |
| 23andMe, Inc.      | David A. Hinds             | X |   |   |   |   |   |  |

## 9 Additional acknowledgments

**ACPRC (Age and Cognitive Performance Research Cohort)** – Phenotype collection in the Age and Cognitive Performance Research Cohort (ACPRC) Manchester and Newcastle Longitudinal Studies of Aging was supported by Social Science Research Council, Medical Research Council, Economic and Social Research Council, Research into Ageing, Wellcome Trust and Unilever plc. Genotyping of the cohort was supported by the UK's Biotechnology and Biological Sciences Research Council (BB.F022441/1) and analysis supported by the Joint Research Council MRC Late Life Health and Wellbeing fRail project (MRC G100137/1). External researchers can discuss access to the data from this study by contacting Dr Neil Pendleton at [neil.pendleton@manchester.ac.uk](mailto:neil.pendleton@manchester.ac.uk).

**AGES (Age, Gene/Environment Susceptibility-Reykjavik Study)** – AGES is funded by NIH contract N01-AG-12100, the NIA Intramural Research Program, Hjartavernd (the Icelandic Heart Association), and the Althingi (the Icelandic Parliament). Genotyping was conducted at the NIA IRP Laboratory of Neurogenetics. Researchers interested in using the AGES data must obtain approval from the AGES study group. Researchers using the data are required to follow the terms of a research agreement between them and the AGES investigators. In accordance with Icelandic law, individual level data cannot be released to external investigators, only summary GWAS results. Investigators interested in collaboration can work on individual data at the Icelandic Heart Association site. For further information contact Prof. V. Gudnason ([v.gudnason@hjarta.is](mailto:v.gudnason@hjarta.is)).

**ALSPAC (Avon Longitudinal Study of Parents and Children)** – We are extremely grateful to all the families who took part in this study, the midwives for their help in recruiting them, and the whole ALSPAC team, which includes interviewers, computer and laboratory technicians, clerical workers, research scientists, volunteers, managers, receptionists and nurses. The Centre National de Génotypage (CNG) carried out DNA genotyping on the Illumina Human660W-Quad array, and genotypes were called with Illumina GenomeStudio supported by the Wellcome Trust (WT088806). The UK Medical Research Council and the Wellcome Trust (Grant ref: 102215/2/13/2) and the University of Bristol provide core support for ALSPAC. This work was also supported by the Medical Research Council Integrative Epidemiology Unit (MC\_UU\_12013/1-9). This publication is the work of the authors and they will serve as guarantors for the contents of this paper. ALSPAC summary data will be published on the data repository at [data.bris.ac.uk](http://data.bris.ac.uk). Please note that the study website contains details of all the data that is available through a fully searchable data dictionary. Ethical approval for the study was obtained from the ALSPAC Ethics and Law Committee and the Local Research Ethics Committees.

**ASPS (Austrian Stroke Prevention Study)** – The research reported in this article was funded by the Austrian Science Fond (FWF) grant number P20545-P05 and P13180. The Medical University of Graz supports the databank of the ASPS. The authors thank the staff and the participants of the ASPS for their valuable contributions. The data file of ASPS regarding all analyses of this manuscript can be provided to external researchers upon request.

**BASE-II (The Berlin Aging Study II)** – BASE-II has been funded by the German Federal Ministry of Education and Research (BMBF) and has been formally divided into four subprojects: “Psychology & Project Coordination and Database” (Max Planck Institute for Human Development [MPIB], grant number 16SV5837), “Survey Methods and Social Science” (German Institute for Economic Research and Socioeconomic Panel [SOEP/DIW], grant number 16 SV5537), Medicine and Geriatrics (Charité – Universitätsmedizin, Berlin [Charité], grant number 16SV5536K), and “Molecular Genetics” (Max Planck Institute for Molecular Genetics, now University of Lübeck [MPIMG-ULBC], grant number 16SV5538). External scientists can apply to the Steering Committee of BASE-II for data access. Although the data are available for other parties are scientific data and not personal contact data, the scientific data are subject to a security level as if they were personal data to ensure that the BASE-II Steering Committee sufficiently protects the large volume of data collected from each BASE-II participant. All existing variables are documented in a handbook. Contact: Katrin Schaar, scientific coordinator, [schaar@mpib-berlin.mpg.de](mailto:schaar@mpib-berlin.mpg.de).

**CoLaus (Cohorte Lausannoise)** – The CoLaus study was and is supported by research grants from GlaxoSmithKline, the Faculty of Biology and Medicine of Lausanne, and the Swiss National Science Foundation (grants 33CSGO-122661, 33CS30-139468 and 33CS30-148401). The authors also express their gratitude to the participants in the Lausanne CoLaus study and to the investigators who have contributed to the recruitment, in particular research nurses Yolande Barreau, Anne-Lise Bastian, Binasa Ramic, Martine Moranville, Martine Baumer, Marcy Sagette, Jeanne Ecoffey and Sylvie Mermoud for data collection. We would also like to thank Gérard Waeber, Vincent Mooser and Dawn Waterworth, co-PIs of the study. Researchers must obtain approval from the Steering Committee of the CoLaus Study and from the Institutional Ethics Committee of the University in Lausanne, Switzerland. Researchers using the data are required to follow the terms of an Assistance Agreement containing a number of clauses designed to ensure protection of privacy and compliance with relevant laws. For further information go to [www.colaus.ch](http://www.colaus.ch) or contact Peter Vollenweider ([peter.vollenweider@chuv.ch](mailto:peter.vollenweider@chuv.ch)).

**COPSAC2000 (Copenhagen Prospective Studies on Asthma in Children)** – We greatly acknowledge the private and public research funding allocated to COPSAC and listed on [www.copsac.com](http://www.copsac.com), with special thanks to The Lundbeck Foundation; Danish State Budget; Danish Council for Strategic Research; The Danish Council for Independent Research and The Capital Region Research Foundation as core supporters. The funding agencies did not have any influence on study design, data collection and analysis, decision to publish or preparation of the manuscript. No pharmaceutical company was involved in the study. We gratefully express our gratitude to the participants of the COPSAC<sub>2000</sub> cohort study for all their support and commitment. We also acknowledge and appreciate the unique efforts of the COPSAC research team. External researchers who wish to obtain access to COPSAC<sub>2000</sub>'s data or EA2 results may contact Tarunveer Singh Ahluwalia ([tarun.ahluwalia@dbac.dk](mailto:tarun.ahluwalia@dbac.dk)).

**CROATIA\_Korcula (Croatia Korcula)** – We would like to acknowledge the invaluable contributions of the recruitment team in Korcula, the administrative teams in Croatia and Edinburgh and the people of Korcula. The CROATIA-Korcula study was funded by grants from the Medical Research Council (UK), European Commission Framework 6 project EUROSPAN (Contract No. LSHG-CT-2006-018947), FP7 project BBMRI-LPC (grant 313010), Ministry of Science, Education and Sports of the Republic of Croatia (grant 108-1080315-0302) and the Croatian Science Foundation (grant 8875). External researchers who

wish to obtain access to CROATIA-Korcula's data or EA2 results may contact Ozren Polasek, [ozren.polasek@mefst.hr](mailto:ozren.polasek@mefst.hr).

**deCODE (deCODE Genetics)** – All deCODE collaborators in this study are employees of deCODE Genetics/Amgen, Inc. External researchers who wish to obtain access to data or EA2 results may contact Gudmar Thorleifsson [gudmar.thorleifsson@decode.is](mailto:gudmar.thorleifsson@decode.is).

**DHS (Dortmund Health Study)** – The collection of sociodemographic and clinical data in the Dortmund Health Study was supported by the German Migraine & Headache Society (DMKG) and by unrestricted grants of equal share from Almirall, Astra Zeneca, Berlin Chemie, Boehringer, Boots Health Care, Glaxo-Smith-Kline, Janssen Cilag, McNeil Pharma, MSD Sharp & Dohme and Pfizer to the University of Muenster. Blood collection in the Dortmund Health Study was done through funds from the Institute of Epidemiology and Social Medicine University of Muenster. Genotyping for the Human Omni Chip was supported by the German Ministry of Education and Research (BMBF, grant no. 01ER0816). Researchers interested in using DHS data are required to sign and follow the terms of a Cooperation Agreement that includes a number of clauses designed to ensure protection of privacy and compliance with relevant laws. For further information, contact Klaus Berger ([bergerk@uni-muenster.de](mailto:bergerk@uni-muenster.de)).

**EGCUT (Estonian Genome Center)** – EGCUT received targeted financing from Estonian Research Council grant IUT20-60, Center of Excellence in Genomics (EXCEGEN) and University of Tartu (SP1GVARENG). We acknowledge EGCUT technical personnel, especially Mr V. Soo and S. Smit. Data analyzes were carried out in part in the High Performance Computing Center of University of Tartu. For more information, please contact Tõnu Esko ([tesko@broadinstitute.org](mailto:tesko@broadinstitute.org)).

**ERF (Erasmus Rucphen Family Study)** – The ERF study as a part of EUROSPAN (European Special Populations Research Network) was supported by European Commission FP6 STRP grant number 018947 (LSHG-CT-2006-01947) and also received funding from the European Community's Seventh Framework Programme (FP7/2007-2013)/grant agreement HEALTH-F4-2007-201413 by the European Commission under the programme "Quality of Life and Management of the Living Resources" of 5th Framework Programme (no. QLG2-CT-2002-01254). High-throughput analysis of the ERF data was supported by joint grant from Netherlands Organization for Scientific Research and the Russian Foundation for Basic Research (NWO-RFBR 047.017.043). Exome sequencing analysis in ERF was supported by the ZonMw grant (project 91111025). We are grateful to all study participants and their relatives, general practitioners and neurologists for their contributions and to P. Veraart for her help in genealogy, J. Vergeer for the supervision of the laboratory work and P. Snijders for his help in data collection. Najaf Amin is supported by the Netherlands Brain Foundation (project number F2013(1)-28). The ERF study genome-wide array data and phenotype data (age and gender) is archived in European Genome-Phenome Database (EGA). The study is archived in the DAC named Erasmus Rucphen Family Study with the accession code: EGAS00001001134. Researchers who wish to use other phenotypic data of the Erasmus Rucphen Family Study must seek approval from the management team of the Erasmus Rucphen Family study. They are advised to contact the study PI, professor Cornelia van Duijn ([c.vanduijn@erasmusmc.nl](mailto:c.vanduijn@erasmusmc.nl)).



**FamHS (Family Heart Study)** – Family Heart Study is supported in part by NIDDK grant 1R01DK8925601 (IBB). Data and results are available directly from the investigators (contact IBB).

**FINRISK (FINRISK)** – The FINRISK cohorts have been mainly funded by budgetary funds from the National Institute for Health and Welfare. Additional funding has been obtained from the Academy of Finland (grant # 139635 and #269517), The EU FP7 under grant agreements nr. 313010 (BBMRI-LPC), nr. 305280 (MIMOmics), and nr. 261433 (BioSHaRE-EU), the Yrjö Jahnsson Foundation, the Juho Vainio Foundation and from the Finnish Foundation for Cardiovascular Research. Data used for this study can be made available on request to the FINRISK Management Group according to the given ethical guidelines and Finnish legislation.

**FTC (Finnish Twin Registry)** – We warmly thank the participating twin pairs and their family members for their contribution. We would like to express our appreciation to the skilled study interviewers A-M Iivonen, K Karhu, H-M Kuha, U Kulmala-Gråhn, M Mantere, K Saanakorpi, M Saarinen, R Sipilä, L Viljanen, and E Voipio. Anja Häppölä and Kauko Heikkilä are acknowledged for their valuable contribution in recruitment, data collection, and data management. Antti-Pekka Sarin and Samuli Ripatti are acknowledged for genotype quality control and imputation. Phenotyping and genotyping of the Finnish twin cohorts has been supported by the Academy of Finland Center of Excellence in Complex Disease Genetics grants 213506, 129680; the Academy of Finland grants 100499, 205585, 118555, 141054, 265240, 263278 and 264146 (to prof. Jaakko Kaprio); NIH Grant DA12854 (to prof. Pamela A.F. Madden, Department of Psychiatry, Washington University School of Medicine, Saint Louis, MO, USA); Sigrid Juselius Foundation (to prof. Jaakko Kaprio); Global Research Award for Nicotine Dependence, Pfizer Inc. (to prof. Jaakko Kaprio), the Wellcome Trust Sanger Institute, Hinxton, Cambridge, UK; and the Broad Institute, Cambridge, MA, USA. Association analyses and genotype imputation were run at the ELIXIR Finland node hosted at CSC - IT Center for Science for ICT resources. Researchers interested in using FTC data must obtain approval from the Data Access Committee (DAC) of the Institute for Molecular Medicine Finland (FIMM). For more details please contact the chair of the FIMM DAC ([hannele.laivuori@helsinki.fi](mailto:hannele.laivuori@helsinki.fi)). Note that anonymized individual level data can only be released after study has been approved by Research Ethics Committee of University of Helsinki and must be carried out in collaboration with FTC investigators. To ensure protection of privacy and compliance with national data protection legislation, a data use/transfer agreement is needed, the content and specific clauses of which will depend on the nature of the requested data. For further information please contact Jaakko Kaprio ([jaakko.kaprio@helsinki.fi](mailto:jaakko.kaprio@helsinki.fi)).

**GS (Generation Scotland)** – Generation Scotland received core funding from the Chief Scientist Office of the Scottish Government Health Directorate CZD/16/6 and the Scottish Funding Council HR03006. Genotyping of the GS:SFHS samples was carried out by the Genetics Core Laboratory at the Wellcome Trust Clinical Research Facility, Edinburgh, Scotland and was funded by the UK's Medical Research Council. Ethics approval for the study was given by the NHS Tayside committee on research ethics (reference 05/S1401/89). We are grateful to all the families who took part, the general practitioners and the Scottish School of Primary Care for their help in recruiting them, and the whole Generation Scotland team, which includes interviewers, computer and laboratory technicians, clerical workers, research scientists, volunteers, managers, receptionists, healthcare assistants and nurses.

Information on applications for access to Generation Scotland data can be found at <http://www.generationscotland.org>.

**GOYA (Genetics of Overweight Young Adults)** - This study was conducted as part of the activities of the Danish Obesity Research Centre (DanORC, [www.danorc.dk](http://www.danorc.dk)) and the MRC centre for Causal Analyses in Translational Epidemiology (MRC CAiTE), and the Gene-diet Interactions in Obesity project (GENDINOB, [www.gendinob.dk](http://www.gendinob.dk)). LP was supported by and the genotyping for GOYA was funded by the Wellcome Trust (WT 084762MA). LP was supported by a Medical Council New Investigator Award (MRC G0800582 to DME). We thank all the participants of the study. TSA was also funded by the GENDINOB project and acknowledges the same. External researchers who wish to obtain access to GOYA (male) data or EA2 results may contact Tarunveer Singh Ahluwalia ([tarun.ahluwalia@dbac.dk](mailto:tarun.ahluwalia@dbac.dk) or [veertarun@gmail.com](mailto:veertarun@gmail.com)).

**GRAPHIC (Genetic Regulation of Arterial Pressure in Humans in the Community)** – Recruitment and genotyping for the GRAPHIC cohort were funded by the British Heart Foundation (BHF). NJS holds a Chair funded by the BHF and is a UK National Institute for Health Research (NIHR) Senior Investigator. CPN is supported by the BHF. MDT holds a Medical Research Council Senior Clinical Fellowship (G0902313). LMH is supported by the NIHR Leicester Cardiovascular Biomedical Research Unit. External researchers who wish to obtain access to GRAPHIC data or EA2 results may contact Prof. Nilesh Samani ([njs@le.ac.uk](mailto:njs@le.ac.uk)).

**Health 2000** – The Health 2000 Study was mainly funded from the budget of the National Institute for Health and Welfare (THL). Additional funding was received from the Finnish Centre for Pensions, the Social Insurance Institution of Finland, the Local Government Pensions Institution, the National Research and Development Centre for Welfare and Health, the Finnish Dental Association, the Finnish Dental Society, Statistics Finland, the Finnish Institute for Occupational Health, The Finnish Work Environment Fund, the UKK Institute for Health Promotion Research and the Occupational Safety and Health Fund of the State Sector. The data used for this study can be made available on request to the Health 2000/2011 scientific committee according to the ethical and research guidelines ([www.terveys2011.info/aineisto](http://www.terveys2011.info/aineisto)) as well as Finnish legislation.

**HBCS (Helsinki Birth Cohort Study)** – We thank all study participants as well as everybody involved in the Helsinki Birth Cohort Study. Helsinki Birth Cohort Study has been supported by grants from the Academy of Finland, the Finnish Diabetes Research Society, Folkhälsan Research Foundation, Novo Nordisk Foundation, Finska Läkaresällskapet, Signe and Ane Gyllenberg Foundation, University of Helsinki, Ministry of Education, Ahokas Foundation, Emil Aaltonen Foundation. Researchers interested in using HBCS data must obtain approval from the Steering Committee of the Helsinki Birth Cohort Study. Researchers using the data are required to follow the terms in a number of clauses designed to ensure protection of privacy and compliance with relevant Finnish laws. For further information, contact Johan Eriksson ([johan.eriksson@helsinki.fi](mailto:johan.eriksson@helsinki.fi)).

**HCS (Hunter Community Study)** – The authors would like to thank the men and women participating in the HCS as well as all the staff, investigators and collaborators who have supported or been involved in the project to date. The University of Newcastle provided \$300 000 from its Strategic Initiatives Fund, and \$600 000 from the Gladys M Brawn Senior Research Fellowship scheme; the Vincent Fairfax Family Foundation, a private philanthropic

trust, provided \$195 000; The Hunter Medical Research Institute provided media support during the initial recruitment of participants; and Dr Anne Crotty, Prof. Rodney Scott and Associate Prof. Levi provided financial support towards freezing costs for the long-term storage of participant blood samples. External researchers may request data access from Chris Oldmeadow, Elizabeth Holliday or John Attia by email.

**HNRS (Heinz Nixdorf Recall Study)** – The Heinz Nixdorf Recall Study thank the Heinz Nixdorf Foundation (Germany), the German Federal Ministry of Research and Education and projects SI 236/8-1 and SI 236/9-1 from the German Research Council for the generous support of this study. We acknowledge the support of the Sarstedt AG & Co. (Nümbrecht, Germany) for laboratory equipment. The genotyping was partially supported by the German Federal Ministry of Education and Research (BMBF) through the Integrated Network IntegraMent (Integrated Understanding of Causes and Mechanisms in Mental Disorders), under the auspices of the e:Med Programme (grant 01ZX1314A). We are indebted to all study participants and to the dedicated personnel of the study centre of the Heinz Nixdorf Recall study. Advisory Board: Meinertz T, Hamburg, Germany (Chair); Bode C, Freiburg, Germany; de Feyter PJ, Rotterdam, Netherlands; Güntert B, Hall i.T., Austria; Gutzwiller F, Bern, Switzerland; Heinen H, Bonn, Germany; Hess O, Bern, Switzerland; Klein B, Essen, Germany; Löwel H, Neuherberg, Germany; Reiser M, Munich, Germany; Schwaiger M, Munich, Germany; Steinmüller C, Bonn, Germany; Theorell T, Stockholm, Sweden; Willich SN, Berlin, Germany. External researchers can send their inquiry to [boerge.schmidt@uk-essen.de](mailto:boerge.schmidt@uk-essen.de) to get access to the study results.

**HRS (Health and Retirement Study)** – HRS is supported by the National Institute on Aging (NIA U01AG009740). The genotyping was funded separately by the National Institute on Aging (RC2 AG036495, RC4 AG039029). Our genotyping was conducted by the NIH Center for Inherited Disease Research (CIDR) at Johns Hopkins University. Genotyping quality control and final preparation of the data were performed by the Genetics Coordinating Center at the University of Washington. Genotype data can be accessed via the database of Genotypes and Phenotypes (dbGaP, <http://www.ncbi.nlm.nih.gov/gap>, accession number phs000428.v1.p1). Researchers who wish to link genetic data with other HRS measures that are not in dbGaP, such as educational attainment, must apply for access from HRS. See the HRS website (<http://hrsonline.isr.umich.edu/gwas>) for details.

**HYPERGENES** - The European Union (FP7-HEALTH-F4-2007-201550-HYPEREGENS, HEALTH-2011.2.4.2-2-EU-MASCARA, HEALTH-F7-305507 HOMAGE and the European Research Council Advanced Researcher Grant-2011-294713-EPLORE). InterOmics project (PB05 MIUR-CNR Italian Flagship Project). The Fonds voor Wetenschappelijk Onderzoek Vlaanderen, Ministry of the Flemish Community, Brussels, Belgium (G.0881.13 and G.088013). External researchers can discuss access to the data from this study by contacting Daniele Cusi ([daniele.cusi@unimi.it](mailto:daniele.cusi@unimi.it)).

**INGI-CARL, INGI-FVG (Italian Network of Genetic Isolates—Carlantino, Friuli Venezia Giulia)** – We would like to acknowledge the following funds: Italian Ministry of Health RC n.1/2014 Linea 3. Access to our data is usually available upon request. For more information, please contact Dragana Vuckovic ([dragana.vuckovic@burlo.trieste.it](mailto:dragana.vuckovic@burlo.trieste.it)).

**The KORA research platform (KORA, Cooperative Research in the Region of Augsburg)** – KORA was initiated and financed by the Helmholtz Zentrum München - German Research Center for Environmental Health, which is funded by the German Federal

Ministry of Education and Research and by the State of Bavaria. Furthermore, KORA research was supported within the Munich Center of Health Sciences (MC Health), Ludwig-Maximilians-Universität, as part of LMUinnovativ. External researchers can apply for KORA data or our EA2.0 results via our KORA.PASST project application self-service tool at <https://helmholtz-muenchen.managed-otrs.com/otrs/customer.pl>.

**LBC (Lothian Birth Cohort)** – We thank the cohort participants and team members who contributed to these studies. Phenotype collection in the Lothian Birth Cohort 1921 was supported by the UK's Biotechnology and Biological Sciences Research Council (BBSRC), The Royal Society, and The Chief Scientist Office of the Scottish Government. Phenotype collection in the Lothian Birth Cohort 1936 was supported by Age UK (The Disconnected Mind project). Genotyping of the cohorts was funded by the BBSRC. The work was undertaken by The University of Edinburgh Centre for Cognitive Ageing and Cognitive Epidemiology, part of the cross council Lifelong Health and Wellbeing Initiative (MR/K026992/1). Funding from the BBSRC and Medical Research Council (MRC) is gratefully acknowledged. The raw data collected in the course of our research with human participants is available upon request (please contact, by e-mail, Professor Ian Deary, at the University of Edinburgh, and ask for a 'Lothian Birth Cohort Data Request Form'). The process is facilitated by a full-time Lothian Birth Cohort database manager. Such proposals, when approved, are conducted in collaboration with appropriate members of the Lothian Birth Cohort study team.

**LifeLines (LifeLines)** – Expanded Banner or Group Author: Behrooz Z Alizadeh (1), Rudolf A de Boer (2), H Marika Boezen (1), Marcel Bruinenberg (3), Lude Franke (4), Pim van der Harst (2), Hans L Hillege (1,2), Melanie M van der Klauw (5), Gerjan Navis (6), Johan Ormel (7), Dirkje S Postma (8), Judith GM Rosmalen (7), Joris P Slaets (9), Harold Snieder (1), Ronald P Stolk (1), Bruce HR Wolffenbuttel (5), Cisca Wijmenga (4).  
(1) Department of Epidemiology, University of Groningen, University Medical Center Groningen, The Netherlands  
(2) Department of Cardiology, University of Groningen, University Medical Center Groningen, The Netherlands  
(3) LifeLines Cohort Study, University of Groningen, University Medical Center Groningen, The Netherlands  
(4) Department of Genetics, University of Groningen, University Medical Center Groningen, The Netherlands  
(5) Department of Endocrinology, University of Groningen, University Medical Center Groningen, The Netherlands  
(6) Department of Internal Medicine, Division of Nephrology, University of Groningen, University Medical Center Groningen, The Netherlands  
(7) Interdisciplinary Center of Psychopathology of Emotion Regulation (ICPE), Department of Psychiatry, University of Groningen, University Medical Center Groningen, The Netherlands  
(8) Department of Pulmonology, University of Groningen, University Medical Center Groningen, The Netherlands  
(9) University Center for Geriatric Medicine, University of Groningen, University Medical Center Groningen, The Netherlands

The LifeLines Cohort Study, and generation and management of GWAS genotype data for the LifeLines Cohort Study is supported by the Netherlands Organization of Scientific Research NWO (grant 175.010.2007.006), the Economic Structure Enhancing Fund (FES) of

the Dutch government, the Ministry of Economic Affairs, the Ministry of Education, Culture and Science, the Ministry for Health, Welfare and Sports, the Northern Netherlands Collaboration of Provinces (SNN), the Province of Groningen, University Medical Center Groningen, the University of Groningen, Dutch Kidney Foundation and Dutch Diabetes Research Foundation. We thank Behrooz Z. Alizadeh, Annemieke Boesjes, Marcel Bruinenberg, Noortje Festen, Pim van der Harst, Ilja Nolte, Lude Franke, Mitra Valimohammadi for their help in creating the GWAS database, and Rob Bieringa, Joost Keers, René Oostergo, Rosalie Visser, Judith Vonk for their work related to data-collection and validation. The authors are grateful to the study participants, the staff from the LifeLines Cohort Study and the contributing research centers delivering data to LifeLines and the participating general practitioners and pharmacists. All data and samples collected by LifeLines are available to scientific researchers worldwide. It is also possible to prospectively collect additional data and samples in a selected group of LifeLines participants in an add-in study. Researchers can apply for data, samples or an add-on study by filling in the application form for research and submitting the completed form through our data catalogue, together with a selection of the requested data. Please contact dr. Salome Scholtens at [s.scholtens@umcg.nl](mailto:s.scholtens@umcg.nl), when you may need more specific information.

**MCTFR (The Minnesota Center for Twin and Family Research)** – MCTFR was supported in part by USPHS Grants from the National Institute on Alcohol Abuse and Alcoholism (AA09367 and AA11886), the National Institute on Drug Abuse (DA05147, DA13240, and DA024417), and the National Institute on Mental Health (MH066140). William Iacono was supported in part by a grant from the National Institute on Drug Abuse (DA 036216). GWAS and phenotypic data for MCTFR subjects who provided consent to place their data in a public repository are deposited into the database of Genotypes and Phenotypes (dbGaP, [www.ncbi.nlm.nih.gov/gap](http://www.ncbi.nlm.nih.gov/gap)) under phs000620. For further information, please contact Matt McGue ([mcgue001@umn.edu](mailto:mcgue001@umn.edu)).

**MGS (Molecular Genetics of Schizophrenia)** - We thank the study participants of the Molecular Genetics of Schizophrenia (MGS). MGS was mainly supported by R01MH059571, R01MH081800, and U01MH079469 (to P.V.G.); and other NIH grants for other MGS sites (R01MH067257 to N.G.B., R01MH059588 to B.J.M., R01MH059565 to R.F., R01MH059587 to F.A., R01MH060870 to W.F.B., R01MH059566 to D.W.B., R01MH059586 to J.M.S., R01MH061675 to D.F.L., R01MH060879 to C.R.C., U01MH046276 to C.R.C., and U01MH079470 to D.F.L.). GWAS and phenotypic data for all MGS subjects are deposited into the database of Genotypes and Phenotypes (dbGaP, [www.ncbi.nlm.nih.gov/gap](http://www.ncbi.nlm.nih.gov/gap)) under phs000021 and phs000167.

**MoBa (Mother and Child Cohort of NIPH)** - This work was supported by grants from the Norwegian Research Council (FUGE 183220/S10, FRIMEDKLI-05 ES236011), Swedish Medical Society (SLS 2008-21198), Jane and Dan Olsson Foundations and Swedish government grants to researchers in the public health service (ALFGBG-2863, ALFGBG-11522, ALFGBG-426411) Sahlgrenska University Hospital, Gothenburg, Sweden, and the European Community's Seventh Framework Programme (FP7/2007-2013), grant agreement HEALTH-F4-2007-201413. The Norwegian Mother and Child Cohort Study was also supported by the Norwegian Ministry of Health and the Ministry of Education and Research, NIH/NIEHS (contract no N01-ES-75558), NIH/NINDS (grant no.1 UO1 NS 047537-01 and grant no.2 UO1 NS 047537-06A1), and the Norwegian Research Council/FUGE (grant no. 151918/S10). We are grateful to all the participating families in Norway who take part in this



ongoing cohort study. For further information, contact the principal investigator of MoBa, Per Magnus ([per.magnus@fhi.no](mailto:per.magnus@fhi.no)).

**NESDA (Netherlands Study of Depression and Anxiety)** – We acknowledge financial support from the Geestkracht program of ZonMW (10-000-1002); matching funds from universities and mental health care institutes involved in NESDA; Center for Medical Systems Biology (NWO Genomics), Neuroscience Campus Amsterdam. Genotyping was funded by the Genetic Association Information Network (GAIN) of the Foundation for the US National Institutes of Health. Genotype data were obtained from dbGaP (<http://www.ncbi.nlm.nih.gov/dbgap>, accession number phs000020.v1.p1). Researchers interested in using the NESDA data must obtain approval from the NESDA study group. Researchers using the data are required to follow the signed terms of a research agreement between them and the NESDA investigators. Note that individual level data cannot be released to external investigators, only summary GWAS results. For further information contact B.W.J.H. Penninx ([b.penninx@vumc.nl](mailto:b.penninx@vumc.nl)).

**NFBC1966 (Northern Finland Birth Cohorts (1966 Cohort))** – We thank Professor Paula Rantakallio (launch of NFBC1966 and initial data collection), Ms Sarianna Vaara (data collection), Ms Tuula Ylitalo (administration), Mr Markku Koiranen (data management), Ms Outi Tornwall and Ms Minttu Jussila (DNA biobanking). This work was supported by the Academy of Finland [project grants 104781, 120315, 129418, Center of Excellence in Complex Disease Genetics and Public Health Challenges Research Program (SALVE)], University Hospital Oulu, Biocenter, University of Oulu, Finland (75617), the European Commission [EURO-BLCS, Framework 5 award QLG1-CT-2000-01643], The National Heart, Lung and Blood Institute [5R01HL087679-02] through the SNP Typing for Association with Multiple Phenotypes from Existing Epidemiologic Data (STAMPEED) program [1RL1MH083268-01], The National Institute of Health/The National Institute of Mental Health [5R01MH63706:02], European Network of Genomic and Genetic Epidemiology (ENGAGE) project and grant agreement [HEALTH-F4-2007-201413], and the Medical Research Council, UK [G0500539, G0600705, PrevMetSyn/ Public Health Challenges Research Program (SALVE)]. Researchers interested in using NFBC1966 data must obtain approval from the Ethical Committee of Northern Ostrobothnia Hospital District and from the Data and Publication Committee of the Northern Finland Birth Cohorts. Researchers using the data are required to follow The Declaration of Helsinki and rules of practice containing a number of clauses designed to ensure protection of privacy and compliance with relevant laws. For further information, contact Marjo-Riitta Jarvelin ([m.jarvelin@imperial.ac.uk](mailto:m.jarvelin@imperial.ac.uk)).

**NBS (The Nijmegen Biomedical Study)** – NBS is a population-based survey conducted at the Department for Health Evidence, and the Department of Laboratory Medicine of the Radboud university medical center. Principal investigators of the Nijmegen Biomedical Study are Lambertus Kiemeney, André Verbeek, Dorine Swinkels and Barbara Franke. The Nijmegen Biomedical Study (NBS) data are managed by the NBS project team and are available upon request; see [www.nijmegenbiomedischestudie.nl](http://www.nijmegenbiomedischestudie.nl) for an overview of the data available in this study. Current practical coordinator of the NBS is dr. T.E. Galesloot. Readers can contact her to request the data ([Tessel.Galesloot@radboudumc.nl](mailto:Tessel.Galesloot@radboudumc.nl)).

**NTR (Netherlands Twin Register)** – We would like to thank all the twins and family members for their participation. This work was supported by the Netherlands Organization for Scientific Research (NWO: MagW/ZonMW grants 904-61-090, 985-10-002, 904-61-

193,480-04-004, 400-05-717, Addiction-31160008 Middelgroot-911-09-032, Spinozapremie 56-464-14192), Biobanking and Biomolecular Resources Research Infrastructure (BBMRI – NL, 184.021.007), the VU University's Institute for Health and Care Research (EMGO+ ) and Neuroscience Campus Amsterdam (NCA), the European Science Council (ERC Advanced, 230374), the Avera Institute for Human Genetics, Sioux Falls, South Dakota (USA) and the National Institutes of Health (NIH, R01D0042157-01A). Part of the genotyping was funded by the Genetic Association Information Network (GAIN) of the Foundation for the US National Institutes of Health (NIMH, MH081802) and by the Grand Opportunity grants 1RC2MH089951-01 and 1RC2 MH089995-01 from the NIMH. Part of the analyses were carried out on the Genetic Cluster Computer (<http://www.geneticcluster.org>), which is financially supported by the Netherlands Scientific Organization (NWO 480-05-003), the Dutch Brain Foundation, and the department of Psychology and Education of the VU University Amsterdam. For access to NTR results, please contact Abdel Abdellaoui at [a.abdellaoui@vu.nl](mailto:a.abdellaoui@vu.nl) or Dorret I. Boomsma at [di.boomsma@vu.nl](mailto:di.boomsma@vu.nl).

**OGP (Ogliastra Genetic Park)** – We thank the Ogliastra population and all the individuals who participated in this study. We are very grateful to the municipal administrators for their collaboration to the project and for economic and logistic support. This research was supported by grant from the Italian Ministry of Education, University and Research (MERIT RBNE08NKH7\_007). For more information and for access to results please contact Mario Pirastu at [pirastu@igp.cnr.it](mailto:pirastu@igp.cnr.it) or Maria Pina Concas at [m.p.concas@irgb.cnr.it](mailto:m.p.concas@irgb.cnr.it).

**ORCADES (The Orkney Complex Disease Study)** – ORCADES was supported by the Chief Scientist Office of the Scottish Government, the Royal Society, the MRC Human Genetics Unit, Arthritis Research UK and the European Union framework program 6 EUROSPAN project (contract no. LSHG-CT-2006-018947). DNA extractions were performed at the Wellcome Trust Clinical Research Facility in Edinburgh. We would like to acknowledge the invaluable contributions of Lorraine Anderson and the research nurses in Orkney, the administrative team in Edinburgh and the people of Orkney. Further information and association summary statistics are available from [orkney@ed.ac.uk](mailto:orkney@ed.ac.uk).

**PREVEND (Prevention of Renal and Vascular Endstage Disease)** – PREVEND genetics is supported by the Dutch Kidney Foundation (Grant E033), the EU project grant GENEURE (FP-6 LSHM CT 2006 037697), the National Institutes of Health (grant 2R01LM010098), The Netherlands organisation for health research and development (NWO-Groot grant 175.010.2007.006, NWO VENI grant 916.761.70, ZonMw grant 90.700.441), and the Dutch Inter University Cardiology Institute Netherlands (ICIN). For more information, contact PREVEND's PI Pim van der Harst [p.van.der.harst@umcg.nl](mailto:p.van.der.harst@umcg.nl).

**QIMR (Queensland Institute of Medical Research)** – Funding was provided by the Australian National Health and Medical Research Council (241944, 339462, 389927, 389875, 389891, 389892, 389938, 442915, 442981, 496739, 552485, 552498), the Australian Research Council (A7960034, A79906588, A79801419, DP0770096, DP0212016, DP0343921), the FP-5 GenomEUtwin Project (QLG2-CT-2002-01254), and the U.S. National Institutes of Health (NIH grants AA07535, AA10248, AA13320, AA13321, AA13326, AA14041, DA12854, MH66206). A portion of the genotyping on which the QIMR study was based (Illumina 370K scans) was carried out at the Center for Inherited Disease Research, Baltimore (CIDR), through an access award to the authors' late colleague Dr. Richard Todd (Psychiatry, Washington University School of Medicine, St Louis).

Imputation was carried out on the Genetic Cluster Computer, which is financially supported by the Netherlands Scientific Organization (NWO 480-05-003). N.W.H.M was supported by a PhD scholarship from the ANZ trust. S.E.M., is supported by the Australian Research Council (ARC) Fellowship Scheme. Dale R. Nyholt is supported by the Australian Research Council (ARC) Future Fellowship (FT0991022) and National Health and Medical Research Council (NHMRC) Research Fellowship (APP0613674) Schemes. The funders had no role in study design, data collection and analysis, decision to publish, or preparation of the manuscript. Researchers interested in using QIMR data can contact Nick Martin ([Nick.Martin@qimrberghofer.edu.au](mailto:Nick.Martin@qimrberghofer.edu.au)) and Sarah Medland ([medlandse@gmail.com](mailto:medlandse@gmail.com)).

**RS (Rotterdam Study)** – The generation and management of GWAS genotype data for the Rotterdam Study is supported by the Netherlands Organisation of Scientific Research NWO Investments (nr. 175.010.2005.011, 911-03-012). This study is funded by the Research Institute for Diseases in the Elderly (014-93-015; RIDE2), the Netherlands Genomics Initiative (NGI)/Netherlands Organisation for Scientific Research (NWO) project nr. 050-060-810. We thank Pascal Arp, Mila Jhamai, Marijn Verkerk, Lizbeth Herrera and Marjolein Peters for their help in creating the GWAS database, and Karol Estrada and Maksim V. Struchalin for their support in creation and analysis of imputed data. The Rotterdam Study is funded by Erasmus Medical Center and Erasmus University, Rotterdam, Netherlands Organization for the Health Research and Development (ZonMw), the Research Institute for Diseases in the Elderly (RIDE), the Ministry of Education, Culture and Science, the Ministry for Health, Welfare and Sports, the European Commission (DG XII), and the Municipality of Rotterdam. The authors are grateful to the study participants, the staff from the Rotterdam Study and the participating general practitioners and pharmacists. Some of the statistical analyses were carried out on the Genetic Cluster Computer (<http://www.geneticcluster.org>) which is financially supported by the Netherlands Scientific Organization (NWO 480-05-003 PI: Posthuma) along with a supplement from the Dutch Brain Foundation and the VU University Amsterdam. Researchers who wish to use data of the Rotterdam Study must obtain approval from the Rotterdam Study Management Team. They are advised to contact the PI of the Rotterdam Study, Dr Albert Hofman ([a.hofman@erasmusmc.nl](mailto:a.hofman@erasmusmc.nl)).

**RUSH (The Rush Memory and Aging Project, and Religious Orders Study)** is supported by NIA Grants R01AG15819, R01AG17917, R01AG33678, and the Translational Genomics Research Institute. The Rush Religious Orders Study is supported by NIA Grants P30AG10161, R01AG15819 and R01AG30146, and the Translational Genomics Research Institute. We thank the study participants and the staff of the Rush Alzheimer's Disease Center. To obtain data from the Rush Alzheimer's Disease Center (RADC), please submit a request through the RADC research website: <https://www.radc.rush.edu/res/ext/home.htm>.

**SardiNia (SardinNIA Study of Aging)** - The SardiNIA study thanks the many individuals who generously participated in this study, the Mayors and citizens of the Sardinian towns involved, the head of the Public Health Unit ASL4, and the province of Ogliastra for their volunteerism and cooperation. In addition, we are grateful to the Mayor and the administration in Lanusei for providing and furnishing the clinic site. This work was supported by the Intramural Research Program of the National Institute on Aging (NIA), National Institutes of Health (NIH), with contracts NO1-AG-1-2109 and HHSN271201100005C. For more information, contact Francesca Cucca ([francesco.cucca@irgb.cnr.it](mailto:francesco.cucca@irgb.cnr.it)) or David Schlessinger ([SchlessingerD@grc.nia.nih.gov](mailto:SchlessingerD@grc.nia.nih.gov)).



**SHIP (Study of Health in Pomerania)** – SHIP is part of the Community Medicine Research net of the University of Greifswald, Germany, which is funded by the Federal Ministry of Education and Research (grants no. 01ZZ9603, 01ZZ0103, and 01ZZ0403), the Ministry of Cultural Affairs as well as the Social Ministry of the Federal State of Mecklenburg-West Pomerania, and the network ‘Greifswald Approach to Individualized Medicine (GANI\_MED)’ funded by the Federal Ministry of Education and Research (grant 03IS2061A). Genome-wide data have been supported by the Federal Ministry of Education and Research (grant no. 03ZIK012) and a joint grant from Siemens Healthcare, Erlangen, Germany and the Federal State of Mecklenburg- West Pomerania. The University of Greifswald is a member of the Caché Campus program of the InterSystems GmbH. The SHIP and SHIP-TREND data and results may be accessed via a data transfer application online at: [https://fvcm.med.uni-greifswald.de/cm\\_antrag/](https://fvcm.med.uni-greifswald.de/cm_antrag/) (support by email: [transfer@uni-greifswald.de](mailto:transfer@uni-greifswald.de)).

**STR (Swedish Twin Registry)** – The Jan Wallander and Tom Hedelius Foundation (P2012-0002:1), the Ragnar Söderberg Foundation (E9/11), The Swedish Research Council (421-2013-1061), the Ministry for Higher Education, The Swedish Research Council (M-2205-1112), GenomeUtwinn (EU/QLRT-2001-01254; QLG2-CT-2002-01254), NIH DK U01-066134, The Swedish Foundation for Strategic Research (SSF). Researchers interested in using STR data must obtain approval from the Swedish Ethical Review Board and from the Steering Committee of the Swedish Twin Registry. Researchers using the data are required to follow the terms of an Assistance Agreement containing a number of clauses designed to ensure protection of privacy and compliance with relevant laws. For Further information, contact Patrik Magnusson ([Patrik.magnusson@ki.se](mailto:Patrik.magnusson@ki.se)).

**THISEAS (The Hellenic study of Interactions between SNPs & Eating in Atherosclerosis Susceptibility)** – Recruitment for THISEAS was partially funded by a research grant (PENED 2003) from the Greek General Secretary of Research and Technology; we thank all the dieticians and clinicians for their contribution to the project. The genotyping was funded by the Wellcome Trust. We like to thank the members of the WTSI Genotyping Facility in particular Sarah Edkins and Cordelia Langford. Researchers interested in using the THISEAS data must obtain approval from the THISEAS study group. Researchers using the data are required to follow the terms of a research agreement between them and the THISEAS investigators. Note that individual level data cannot be released to external investigators, only summary GWAS results. For further information contact George Dedoussis ([dedousi@hua.gr](mailto:dedousi@hua.gr)).

**TwinsUK (St. Thomas' UK Adult Twin Registry)** – The study was funded by the Wellcome Trust; European Community's Seventh Framework Programme (FP7/2007-2013). The study also receives support from the National Institute for Health Research (NIHR) BioResource Clinical Research Facility and Biomedical Research Centre based at Guy's and St Thomas' NHS Foundation Trust and King's College London. Tim Spector is an ERC Advanced Researcher. SNP Genotyping was performed by The Wellcome Trust Sanger Institute and National Eye Institute via NIH/CIDR. To obtain access to TwinsUK data please follow our data access policy (<http://www.twinsuk.ac.uk/data-access/submission-procedure/>). TwinsUK EA2.0 summary results are available on request to the corresponding author of the paper.

**WTCCC-58BC and DIL (The Wellcome Trust Case Control Consortium (1958 Birth Cohort) and Diabetes and Inflammation Laboratory)** – DNA collection was funded by

MRC grant G0000934 and cell-line creation by Wellcome Trust grant 068545/Z/02. This research used resources provided by the Type 1 Diabetes Genetics, a collaborative clinical study sponsored by the National Institute of Diabetes and Digestive and Kidney Diseases (NIDDK), National Institute of Allergy and Infectious Diseases, National Human Genome Research Institute, National Institute of Child Health and Human Development, and Juvenile Diabetes Research Foundation International (JDRF) and supported by U01 DK062418. This study makes use of data generated by the Wellcome Trust Case-Control Consortium. A full list of investigators who contributed to generation of the data is available from the Wellcome Trust Case-Control Consortium website. Funding for the project was provided by the Wellcome Trust under the award 076113. Great Ormond Street Hospital/University College London, Institute of Child Health receives a proportion of funding from the Department of Health's National Institute for Health Research (NIHR) ('Biomedical Research Centres' funding). Written consent was obtained from participants for the use of information in medical studies. The 45-year biomedical survey and genetic studies were approved by the South-East Multi-Centre Research Ethics Committee (ref: 01/1/44) and the joint UCL/UCLH Committees on the Ethics of Human Research (Ref: 08/H0714/40). The individual-level genotype and phenotype data for WTCCC-58BC and DIL (T1DGC) can be applied for through the data access committee at <http://www2.le.ac.uk/projects/birthcohort/1958bc/available-resources>.

**YFS (The Cardiovascular Risk in Young Finns Study)** – The Young Finns Study has been financially supported by the Academy of Finland: grants 134309 (Eye), 126925, 121584, 124282, 129378 (Salve), 117787 (Gendi), and 41071 (Skidi); the Social Insurance Institution of Finland; Kuopio, Tampere and Turku University Hospital Medical Funds (grant X51001 for T.L.); Juho Vainio Foundation; Paavo Nurmi Foundation; Finnish Foundation of Cardiovascular Research (T.L.); Finnish Cultural Foundation; Tampere Tuberculosis Foundation (T.L.); Emil Aaltonen Foundation (T.L.); and Yrjö Jahnsson Foundation (T.L.). The expert technical assistance in the statistical analyses by Irina Lisinen, Ville Aalto and Mika Helminen are gratefully acknowledged. Researchers interested in using the YFS data must obtain approval from the YFS study group. Researchers using the data are required to follow the terms of a research agreement between them and the YFS investigators. For further information contact Olli Raitakari ([olli.raitakari@utu.fi](mailto:olli.raitakari@utu.fi)).

**23andMe, Inc.** – We would like to thank the customers and employees of 23andMe for making this work possible. This work was supported by the National Human Genome Research Institute of the National Institutes of Health (grant number R44HG006981).

**Individual acknowledgments** - Valur Emilsson acknowledges the Icelandic Research Fund (130547-051) for financial support. Danielle Posthuma and Christian de Leeuw acknowledge financial support from The Netherlands Organization for Scientific Research (NWO VICI 453-14-005, NWO Complexity 645-000-003). Antony Payton acknowledges financial support from the Central Manchester Foundation Trust for genotype imputation. Niels Rietveld gratefully acknowledges funding from the Netherlands Organization for Scientific Research (NWO Veni grant 016.165.004). Philipp Koellinger gratefully acknowledges funding from the European Research Council (ERC consolidator grant 647648 EdGe).
